# Supplementary material for: Enhanced mechanical properties of acrylate and 5-vinyl-2-norbornene-based ethylene terpolymers: rational design and synthesis using remotely modulated phosphine–sulfonate palladium complexes
Source: Royal Society of Chemistry journal article supplement (doi:10.1039/d4py00722k), 2024-01-01
Supplement: d4py00722k1.pdf [file d4py00722k1.pdf]

# Enhanced mechanical properties of acrylate and 5-vinyl-2-norbornene based ethylene terpolymers: rational design and synthesis using remotely modulated phosphine-sulfonate palladium complexes

*Yong-Qing Li<sup>a,b</sup>, Gui-Ping Cao<sup>a,\*</sup>, Yu-Cai Cao<sup>b,\*</sup>*

<sup>a</sup>UNILAB State Key Laboratory of Chemical Engineering, East China University of Science and Technology, Shanghai, 200237, P. R. China

<sup>b</sup>State Key Laboratory of Polyolefins and Catalysis, Shanghai Key Laboratory of Catalysis Technology for Polyolefins, Shanghai Research Institute of Chemical Industry Co., Ltd, Shanghai, 200062, P. R. China

## Supporting Information

### Experimental

#### General

Nitrogen was purified by passage through columns containing activated molecular sieves. Toluene, THF, CH<sub>2</sub>Cl<sub>2</sub> and diethyl ether were purified by a MBraun SPS system. Deuterated solvents used for NMR spectroscopy were dried and distilled prior to use. Butyl acrylate (BA) was dried over calcium hydride (CaH<sub>2</sub>), distilled under reduced pressure, and stored at -25°C. Other chemicals and reagents were obtained from commercial sources and used without further purification.

<sup>1</sup>H NMR and <sup>13</sup>C NMR spectra were recorded on a JEOL JNM-ECZR 500 MHz spectrometer at ambient temperature unless otherwise indicated. The chemical shifts for protons and carbons were referenced to the residual proton and carbon resonance of chloroform-*d* ( $\delta$ : 7.26 and 77.16, respectively). <sup>1</sup>H NMR analyses of polymers were performed using 5 wt% solutions of the polymers in an NMR tube in CDCl<sub>2</sub>CDCl<sub>2</sub> at 120°C using a 30° pulse of 50.0  $\mu$ s, a spectral width of 10 kHz, a relaxation time of 5.0 s, an acquisition time of 3.2 s. Quantitative <sup>13</sup>C NMR analyses of polymers were performed using 10 wt% solutions of the polymers in an NMR tube in 1,2,4-trichlorobenzene at 125°C using a 30° pulse of 16.8  $\mu$ s, a spectral width of 20 kHz, a relaxation time of 2.0 s, an acquisition time of 0.65 s, and inverse gated decoupling. Samples were preheated for at least 30 min before acquiring data. The molecular weights and molecular weight distributions of the polymers were determined using gel permeation chromatography (GPC) with a PL-220 equipped with two Agilent PLgel Olexis columns at 150 °C using 1,2,4-trichlorobenzene as a solvent. The calibration curve was constructed from polystyrene standard and was corrected for linear polyethylene by universal calibration using the Mark-Houwink parameters of Rudin:

$K = 5.90 \times 10^{-2} \text{ cm}^3/\text{g}$  and  $\alpha = 0.69$  for polyethylene. Melting points of polymers were measured on a TA Instruments DSC Q100 at heating and cooling rates of  $10 \text{ }^\circ\text{C}/\text{min}$  with a temperature range of  $30\text{-}160^\circ\text{C}$ .

A standard test method, ASTM 638, was followed to measure the tensile properties of the polyethylene samples. Polymers were melt-pressed at  $30$  to  $35^\circ\text{C}$  above their melting point to obtain the dog-bone-shaped tensile-test specimens. The test specimens showed  $25\text{-mm}$  gauge length,  $2\text{-mm}$  width, and thickness of  $0.4 \text{ mm}$ . Stress/strain experiments were performed at  $10 \text{ m}/\text{min}$  using a Universal Test Machine at room temperature.

The water contact angles on polymer films were measured using the dynamic sessile drop method. Samples for water contact angle measurements were prepared via evaporation of  $3$  to  $5 \%$  (w/w) solutions in toluene onto glass slides under ambient conditions. The solvent was evaporated on top of a glass slide for  $10$  minutes, and a second layer of the polymer solution was then applied to increase thickness.

**Preparation of sulfur vulcanized crosslinked polymer.** A total amount of  $3.0 \text{ g}$  polymer sample was dissolved in  $100 \text{ mL}$  of toluene at  $80 \text{ }^\circ\text{C}$  under nitrogen. After  $30 \text{ min}$  of reaction, add sulfuric acid (ie  $150 \text{ mg ZnO}$ ,  $30 \text{ mg stearic acid}$ ,  $15 \text{ mg accelerator MBT}$ , accelerator  $20 \text{ mg TMTD}$ ,  $30 \text{ mg sulfur}$ ), the solvent was drained and dried under vacuum at  $45 \text{ }^\circ\text{C}$  for  $24$  hours. The rubber mixture was thermoformed using a hydraulic press at  $10 \text{ MPa}$ ,  $160 \text{ }^\circ\text{C}$ , and cured for  $20$  minutes to produce a  $1 \text{ mm}$  thick sheet for subsequent use.

### Synthesis of Pd and Ni complexes

#### (TMEDA)PdMe<sub>2</sub><sup>[1-3]</sup>

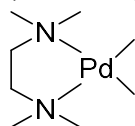

$\text{PdCl}_2$  ( $10 \text{ g}$ ,  $56.39 \text{ mmol}$ ) was added to  $\text{CH}_3\text{CN}$  ( $300 \text{ mL}$ ) and refluxed for  $2 \text{ h}$ . After  $\text{PdCl}_2$  was dissolved completely, the mixture was cooled to room temperature. TMEDA ( $9.9 \text{ g}$ ,  $93.22 \text{ mmol}$ ) was added and the mixture was stirred overnight. The yellow slurry was filtrated and washed by  $\text{Et}_2\text{O}$  ( $60 \text{ mL}$ ), then dried in vacuo to obtain (TMEDA) $\text{PdCl}_2$   $15.88 \text{ g}$ .

(TMEDA) $\text{PdCl}_2$  ( $4.62 \text{ g}$ ,  $15.66 \text{ mmol}$ ) was added to  $\text{Et}_2\text{O}$  ( $49.3 \text{ mL}$ ), stirred for  $10 \text{ min}$ , then  $\text{MeLi}$  ( $19.6 \text{ mL}$ ,  $1.6 \text{ M}$  in  $\text{Et}_2\text{O}$ ,  $31.36 \text{ mmol}$ ) was added dropwise at  $-10 \text{ }^\circ\text{C}$ . The mixture was stirred at  $0 \text{ }^\circ\text{C}$  for  $0.5 \text{ h}$  and at room temperature for  $1 \text{ h}$ , then cold water ( $20 \text{ mL}$ ) was added to the mixture to form a transparent organic layer and a black aqueous layer. The aqueous layer was extracted with  $\text{Et}_2\text{O}$  ( $20 \text{ mL} \times 2$ ). All the organic phase was combined and dried over anhydrous sodium sulfate. The solvent was removed under vacuum to obtain the white solid ( $2.3 \text{ g}$ , yield  $52.8\%$ ).

$^1\text{H NMR}$  ( $500 \text{ MHz}$ , Chloroform- $d$ )  $\delta$   $2.51$  (s,  $4\text{H}$ ),  $2.45$  (s,  $12\text{H}$ ),  $-0.16$  (s,  $6\text{H}$ ).

### *ortho*-(Bis(2-methoxyphenyl)phosphino)toluenesulfonic acid (**L3**)<sup>[4]</sup>

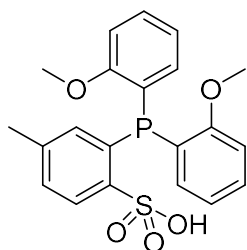

A flask was charged with *p*-toluenesulfonic acid (4.20 g, 24.4 mmol, dehydrated) and THF (50 mL), cooled to 0 °C, stirred for 10 min, and *n*BuLi (19.6 mL of a 2.5 M solution in hexane, 48.8 mmol) was added dropwise. The mixture was warmed to 25°C and stirred for 2 h. A second flask was charged with THF (25 mL) and  $\text{PCl}_3$  (3.35 g, 24.4 mmol), cooled to -30°C, and the solution of dilithiated *p*-toluenesulfonic acid was added and then stirred at room temperature for 1 h. A third flask was charged with THF (50 mL) and anisole (5.28 g, 48.8 mmol), cooled to 0 °C, and *n*BuLi (19.6 mL of a 2.5 M solution in hexane, 48.8 mmol) was added dropwise. The mixture was warmed to 25 °C and stirred for 4h, then transferred to the second flask at 0°C. The mixture was warmed to room temperature and stirred over night. The volatiles were removed under vacuum and the residue was taken up in water (50 mL). The aqueous mixture was acidified with dilute HCl to pH~2. The mixture was extracted with  $\text{CH}_2\text{Cl}_2$  (3 × 25 mL) and the extracts were combined, dried over  $\text{Na}_2\text{SO}_4$ , and evaporated under vacuum to yield a solid. The solid was recrystallized with 8 mL DCM and 5 mL  $\text{Et}_2\text{O}$  at -25 °C, filtrated and dried to afford a white powder **L3**·0.5  $\text{CH}_2\text{Cl}_2$ . Yield 12.6 g, 24.8%.

$^1\text{H}$  NMR (500 MHz, Chloroform-*d*)  $\delta$  8.25 (dd,  $J = 8.0, 5.4$  Hz, 1H), 7.68 (td,  $J = 8.2, 1.6$  Hz, 2H), 7.54 (dt,  $J = 8.0, 1.8$  Hz, 1H), 7.12 – 6.97 (m, 6H), 6.87 (dd,  $J = 15.2, 1.7$  Hz, 1H), 5.29 (s, 1H,  $\text{CH}_2\text{Cl}_2$ ), 3.78 (s, 6H), 2.29 (s, 3H).  $^{13}\text{C}$  NMR (126 MHz, CHLOROFORM-*D*)  $\delta$  161.20, 149.67, 140.48, 139.87, 137.55, 135.20, 134.51, 134.45, 129.34, 129.26, 123.15, 121.19, 113.01, 112.22, 111.92, 107.64, 105.85, 55.57, 53.55, 18.72.  $^{31}\text{P}$  NMR (202 MHz, CHLOROFORM-*D*)  $\delta$  -10.98. HRMS (AP-MALDI):  $m/z$  calcd for  $\text{C}_{21}\text{H}_{21}\text{O}_5\text{PS}$ : 417.0920 [ $\text{M}+\text{H}$ ]; found: 417.0918.

### (**P(2-OMe-Ph)**)<sub>2</sub>(**2-SO<sub>3</sub>-5-Me-Ph**))Pd(Me)(Py) (**Pd3**)

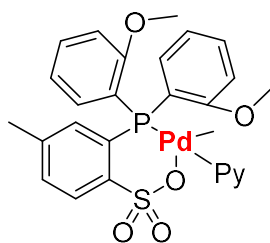

A flask was charged with **L3**·0.5  $\text{CH}_2\text{Cl}_2$  (458.9 mg, 1.0 mmol), (**TMEDA**) $\text{PdMe}_2$  (252.7 mg, 1.0 mmol) and THF (10 mL). The mixture was stirred at room temperature for 1 h, then pyridine (395.5 mg, 5 mmol) was added and stirred for 1 h.  $\text{Et}_2\text{O}$  (30 mL) was added to precipitate the solid. The solid was filtrated, washed with  $\text{Et}_2\text{O}$  and dried under vacuum to afford a white powder. Yield: 0.35 g, 56.8%.

$^1\text{H}$  NMR (500 MHz, Chloroform-*d*)  $\delta$  8.79 (d,  $J = 6.6$  Hz, 2H), 8.09 (dd,  $J = 8.0$ , 4.9 Hz, 1H), 7.85 – 7.77 (m, 1H), 7.62 (s, 2H), 7.53 – 7.47 (m, 2H), 7.44 – 7.37 (m, 2H), 7.24 (d,  $J = 8.2$  Hz, 1H), 7.08 – 6.98 (m, 3H), 6.92 (dd,  $J = 8.3$ , 4.7 Hz, 2H), 3.64 (s, 6H), 2.24 (s, 3H), 0.24 (d,  $J = 2.8$  Hz, 3H).  $^{13}\text{C}$  NMR (126 MHz, CHLOROFORM-*D*)  $\delta$  159.94, 150.58, 150.44, 145.96, 145.40, 139.60, 138.29, 138.21, 137.66, 135.73, 134.82, 133.27, 133.17, 131.43, 130.57, 128.06, 127.55, 127.16, 125.59, 125.04, 124.93, 120.86, 120.76, 120.66, 120.57, 116.72, 116.27, 111.56, 111.39, 55.46, 55.40, 21.37, 0.45.

### 2'-bromo-2,6-dimethoxybiphenyl<sup>[5]</sup>

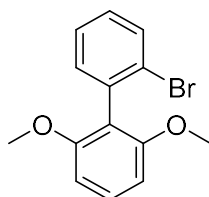

A flask was charged with 1,3-Dimethoxy benzene (70 g, 0.5 mol) and THF (1000 mL). *n*BuLi (2.5 M solution in hexane, 200 mL, 0.5 mmol) was added to the mixture at room temperature and stirred for 1 h. Then 1,2-dibromobenzene (100 g, 0.42 mol) was added dropwise at room temperature and stirred for 3 h. The solvent was removed under vacuum and water (200 mL) was added. The aqueous layer was extracted with  $\text{Et}_2\text{O}$  ( $3 \times 200$  mL) and the extracts were combined, dried over  $\text{Na}_2\text{SO}_4$ , filtrated and dried under vacuum to afford a white powder. Yield: 108 g, 87.7%.

$^1\text{H}$  NMR (500 MHz, Chloroform-*d*)  $\delta$  7.66 (dd,  $J = 8.0$ , 1.3 Hz, 1H), 7.38 – 7.32 (m, 2H), 7.25 – 7.18 (m, 2H), 6.66 (d,  $J = 8.4$  Hz, 2H), 3.74 (s, 6H).  $^{13}\text{C}$  NMR (126 MHz, CHLOROFORM-*D*)  $\delta$  157.74, 136.18, 132.42, 132.39, 129.56, 128.67, 127.01, 125.32, 118.89, 104.10, 56.07.

### *ortho*-(Bis(2,6-dimethoxybiphenyl)phosphino)toluenesulfonic acid (L4)<sup>[6,7]</sup>

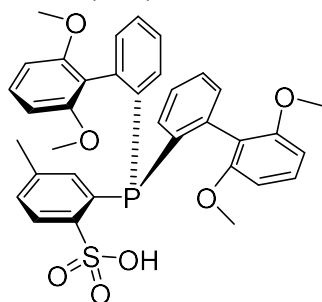

A flask was charged with *p*-toluenesulfonic acid (4.14 g, 24.0 mmol, dehydrated) and THF (50 mL), cooled to 0 °C, stirred for 10 min, and *n*BuLi (19.2 mL of a 2.5 M solution in hexane, 48.0 mmol) was added dropwise. The mixture was warmed to 25 °C and stirred for 2 h. A second flask was charged with THF (60 mL) and  $\text{PCl}_3$  (3.3 g, 24.0 mmol), cooled to -78 °C, and the solution of dilithiated *p*-toluenesulfonic acid was added and then stirred at 0 °C for 1.5 h. A third flask was charged with THF (300 mL) and 2'-bromo-2,6-dimethoxybiphenyl (14.0 g, 48.0 mmol), cooled to -78 °C, and *n*BuLi

(20.0 mL of a 2.5 M solution in hexane, 50.0 mmol) was added dropwise. The mixture was kept at  $-78^{\circ}\text{C}$  for 1 h and then transferred to the second flask at  $-78^{\circ}\text{C}$ . The mixture was warmed to room temperature and stirred over night. The volatiles were removed under vacuum and the residue was taken up in water (200 mL). The aqueous mixture was acidified with dilute HCl to pH~2. The mixture was extracted with  $\text{CH}_2\text{Cl}_2$  ( $3 \times 50$  mL) and the extracts were combined, dried over  $\text{Na}_2\text{SO}_4$ , and evaporated under vacuum to yield a solid. The solid was slurried with 10 mL DCM and 20 mL  $\text{Et}_2\text{O}$ , filtrated and dried to afford a white powder **L4**. Yield 7.45 g, 49.7%.

$^1\text{H}$  NMR (500 MHz, Chloroform-*d*)  $\delta$  8.03 (dd,  $J = 7.9, 5.3$  Hz, 1H), 7.68 – 7.57 (m, 2H), 7.45 – 7.13 (m, 9H), 6.83 (d,  $J = 13.0$  Hz, 1H), 6.33 (d,  $J = 91.4$  Hz, 4H), 3.46 (q,  $J = 7.0$  Hz, 12H), 2.26 (s, 3H). HRMS (AP-MALDI):  $m/z$  calcd for  $\text{C}_{35}\text{H}_{33}\text{O}_7\text{PS}$ : 629.1757 [M+H]; found: 629.1756.

**(P(2,6-diOMePh-Ph)<sub>2</sub>(2-SO<sub>3</sub>-5-Me-Ph))Pd(Me)(Py) (Pd4)**

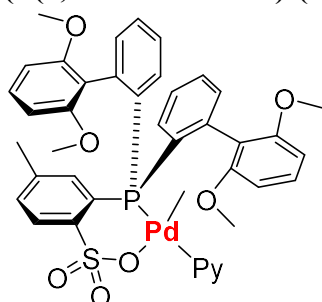

A flask was charged with **L4** (628.9 mg, 1.0 mmol), **(TMEDA)PdMe<sub>2</sub>** (252.7 mg, 1.0 mmol) and THF (10 mL). The mixture was stirred at room temperature for 1 h, then pyridine (395.5 mg, 5 mmol) was added and stirred for 1 h.  $\text{Et}_2\text{O}$  (30 mL) was added to precipitate the solid at  $-25^{\circ}\text{C}$ . The solid was filtrated, washed with  $\text{Et}_2\text{O}$  and dried under vacuum to afford a white powder. Yield: 0.71 g, 85.7%.

$^1\text{H}$  NMR (500 MHz, Chloroform-*d*)  $\delta$  8.57 (dd,  $J = 4.7, 1.8$  Hz, 2H), 7.85 – 7.67 (m, 4H), 7.43 (t,  $J = 8.6$  Hz, 3H), 7.37 – 7.29 (m, 4H), 7.13 (ddd,  $J = 7.7, 4.4, 1.5$  Hz, 2H), 6.95 (t,  $J = 8.3$  Hz, 3H), 6.41 (d,  $J = 9.2$  Hz, 2H), 6.25 (d,  $J = 8.4$  Hz, 2H), 3.68 (s, 6H), 3.41 (s, 6H), 2.16 (s, 3H), 0.18 (d,  $J = 2.3$  Hz, 3H).  $^{13}\text{C}$  NMR (126 MHz, Methylene Chloride-*d*<sub>2</sub>)  $\delta$  157.93, 157.66, 150.82, 138.19, 136.77, 135.79, 134.38, 134.31, 131.15, 129.91, 129.29, 128.22, 126.25, 124.80, 119.15, 103.72, 103.62, 55.51, 21.54, 3.54. Anal. Calcd. for  $\text{C}_{41}\text{H}_{40}\text{NO}_7\text{PPdS}$ : C, 59.46; H, 4.87. Found: C, 58.07; H, 4.95.

**(P(2,6-diOMePh-Ph)<sub>2</sub>(2-SO<sub>3</sub>-Ph))Pd(Me)(Py) (Pd5)**

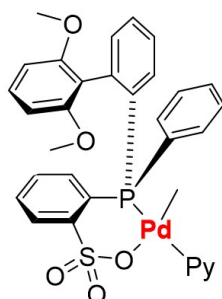

A flask was charged with benzenesulfonic acid (3.8 g, 24.0 mmol, dehydrated) and THF (60 mL), cooled to 0 °C, stirred for 10 min, and nBuLi (19.2 mL of a 2.5 M solution in hexane, 48.0 mmol) was added dropwise. The mixture was warmed to 25°C and stirred for 2 h. A second flask was charged with THF (60 mL) and PPhCl<sub>2</sub> (3.25 mL, 24 mmol), cooled to -78°C, and the solution of dilithiated p-toluenesulfonic acid was added and then stirred at -78°C for 1.5 h. A third flask was charged with THF (300 mL) and 2'-bromo-2,6-dimethoxybiphenyl (7.0 g, 24.0 mmol), cooled to -78°C, and nBuLi (11.2 mL of a 2.5 M solution in hexane, 28.0 mmol) was added dropwise. The mixture was kept at -78°C for 1 h and then transferred to the second flask at -78°C. The mixture was warmed to room temperature and stirred over night. The volatiles were removed under vacuum and the residue was taken up in water (200 mL). The aqueous mixture was acidified with dilute HCl to pH~2. The mixture was extracted with CH<sub>2</sub>Cl<sub>2</sub> (3 × 50 mL) and the extracts were combined, dried over Na<sub>2</sub>SO<sub>4</sub>, and evaporated under vacuum to yield a solid. The solid was slurried with 10 mL DCM and 20 mL Et<sub>2</sub>O, filtrated and dried to afford a white powder 4.9 g.

A flask was charged with white powder (520.0 mg), (TMEDA)PdMe<sub>2</sub> (252.7 mg, 1.0 mmol) and THF (10 mL). The mixture was stirred at room temperature for 1 h, then pyridine (395.5 mg, 5 mmol) was added and stirred for 1 h. Et<sub>2</sub>O (30 mL) was added to precipitate the solid at -25°C. The solid was filtrated, washed with Et<sub>2</sub>O and dried under vacuum to afford a white powder. Yield: 0.53 g, 78.2%.

<sup>1</sup>H NMR (500 MHz, Chloroform-*d*) δ 8.36 (s, 3H), 7.74 (t, *J* = 7.7 Hz, 1H), 7.60 (q, *J* = 8.1, 7.2 Hz, 2H), 7.52 (t, *J* = 7.4 Hz, 1H), 7.45 – 7.37 (m, 4H), 7.35 – 7.25 (m, 7H), 7.20 (t, *J* = 8.3 Hz, 1H), 6.50 (dd, *J* = 8.3, 4.6 Hz, 2H), 3.66 (s, 3H), 2.73 (s, 3H), 0.32 (d, *J* = 2.5 Hz, 3H). <sup>13</sup>C NMR (126 MHz, CHLOROFORM-D) δ 158.16, 157.28, 151.08, 149.22, 141.83, 137.63, 136.18, 134.76, 134.26, 133.24, 131.48, 130.22, 129.76, 129.48, 129.05, 128.68, 128.35, 128.12, 126.46, 124.63, 117.05, 104.11, 103.04, 56.39, 54.17, 0.24. Anal. Calcd. for C<sub>32</sub>H<sub>30</sub>NO<sub>5</sub>PPdS: C, 56.69; H, 4.46. Found: C, 55.46; H, 4.63.

***ortho*-((2,6-dimethoxybiphenyl)(phenyl)phosphino)toluenesulfonic acid (L1) [8]**  
**2-[(2',6'-dimethoxy[1,1'-biphenyl]-2-yl)phenylphosphino]-4-methyl**  
**benzenesulfonic acid**

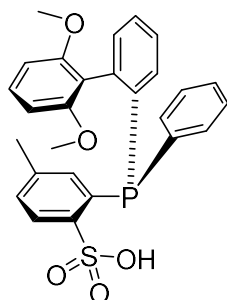

A flask was charged with p-toluenesulfonic acid (4.14 g, 24.0 mmol, dehydrated) and THF (60 mL), cooled to 0 °C, stirred for 10 min, and nBuLi (19.2 mL of a 2.5 M

solution in hexane, 48.0 mmol) was added dropwise. The mixture was warmed to 25°C and stirred for 2 h. A second flask was charged with THF (60 mL) and PPhCl<sub>2</sub> (3.25 mL, 24 mmol), cooled to -78°C, and the solution of dilithiated p-toluenesulfonic acid was added and then stirred at -78°C for 1.5 h. A third flask was charged with THF (300 mL) and 2'-bromo-2,6-dimethoxybiphenyl (7.0 g, 24.0 mmol), cooled to -78°C, and nBuLi (11.2 mL of a 2.5 M solution in hexane, 28.0 mmol) was added dropwise. The mixture was kept at -78°C for 1 h and then transferred to the second flask at -78°C. The mixture was warmed to room temperature and stirred over night. The volatiles were removed under vacuum and the residue was taken up in water (200 mL). The aqueous mixture was acidified with dilute HCl to pH~2. The mixture was extracted with CH<sub>2</sub>Cl<sub>2</sub> (3 × 50 mL) and the extracts were combined, dried over Na<sub>2</sub>SO<sub>4</sub>, and evaporated under vacuum to yield a solid. The solid was slurried with 10 mL DCM and 20 mL Et<sub>2</sub>O, filtrated and dried to afford a white powder **L1·0.5 CH<sub>2</sub>Cl<sub>2</sub>**. Yield 9.1 g, 77%.

<sup>1</sup>H NMR (500 MHz, Chloroform-*d*) δ 8.19 (dd, *J* = 7.9, 5.2 Hz, 1H), 7.73 (t, *J* = 7.7 Hz, 1H), 7.60 – 7.54 (m, 1H), 7.53 – 7.30 (m, 8H), 7.23 (t, *J* = 8.4 Hz, 1H), 7.07 – 7.01 (m, 1H), 6.47 (d, *J* = 8.3 Hz, 1H), 6.39 (d, *J* = 8.4 Hz, 1H), 5.28 (s, 1H), 3.60 (s, 3H), 3.42 (s, 3H), 2.31 (s, 3H). <sup>13</sup>C NMR (126 MHz, CHLOROFORM-*D*) δ 156.97, 156.57, 149.89, 149.82, 140.93, 140.85, 139.80, 139.70, 135.05, 134.05, 133.48, 132.66, 131.69, 131.54, 131.39, 129.22, 128.78, 127.96, 120.30, 119.57, 119.47, 118.74, 113.88, 113.83, 113.15, 112.40, 103.82, 103.73, 55.48, 55.41, 55.35, 55.33, 21.29, 21.24. <sup>31</sup>P NMR (202 MHz, CHLOROFORM-*D*) δ 1.53. HRMS (AP-MALDI): *m/z* calcd for C<sub>27</sub>H<sub>25</sub>O<sub>5</sub>PS: 493.1233 [M+H]; found: 493.1232.

#### (P(2,6-diOMePh-Ph)<sub>2</sub>(2-SO<sub>3</sub>-5-Me-Ph))Pd(Me)(Py) (Pd1)

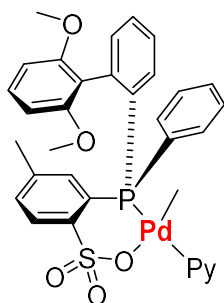

A flask was charged with **L1·0.5 CH<sub>2</sub>Cl<sub>2</sub>** (535.0 mg, 1.0 mmol), **(TMEDA)PdMe<sub>2</sub>** (252.7 mg, 1.0 mmol) and THF (10 mL). The mixture was stirred at room temperature for 1 h, then pyridine (395.5 mg, 5 mmol) was added and stirred for 1 h. Et<sub>2</sub>O (30 mL) was added to precipitate the solid at -25°C. The solid was filtrated, washed with Et<sub>2</sub>O and dried under vacuum to afford a white powder. Yield: 0.41 g, 59.2%.

<sup>1</sup>H NMR (500 MHz, Chloroform-*d*) δ 8.38 (dd, *J* = 4.7, 1.9 Hz, 2H), 8.25 (dd, *J* = 8.0, 4.7 Hz, 1H), 7.77 – 7.71 (m, 1H), 7.69 – 7.56 (m, 2H), 7.48 – 7.40 (m, 2H), 7.34 – 7.27 (m, 8H), 7.23 – 7.19 (m, 2H), 6.52 (d, *J* = 8.4 Hz, 2H), 3.67 (s, 3H), 2.77 (s, 3H), 2.26 (s, 3H), 0.30 (d, *J* = 2.5 Hz, 3H). <sup>13</sup>C NMR (126 MHz, CHLOROFORM-*D*) δ

158.16, 157.23, 150.38, 150.29, 150.18, 146.81, 146.27, 142.70, 141.73, 140.64, 140.21, 137.91, 136.22, 134.75, 134.09, 133.98, 133.76, 133.35, 133.22, 130.94, 130.17, 129.67, 129.51, 129.08, 128.45, 128.37, 128.11, 126.27, 124.62, 124.52, 118.25, 118.20, 103.64, 103.60, 103.02, 102.97, 55.45, 55.40, 54.35, 54.27, 21.59, 0.34. Anal. Calcd. for C<sub>33</sub>H<sub>32</sub>NO<sub>5</sub>PPdS: C, 57.27; H, 4.66. Found: C, 57.05; H, 4.91.

#### 4-phenylbenzenesulfonic Acid

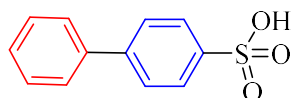

A flask was charged with biphenyl (10 g, 0.067 mol) and CHCl<sub>3</sub> (50 mL). Sulfurochloridic acid (9.6 g, 0.083 mol) in CHCl<sub>3</sub> (10 mL) was added dropwise for 1 h. The mixture was stirred for 0.5 h, filtrated, and washed by CHCl<sub>3</sub>. The solid was dried under vacuum to afford a white powder. Yied: 10.7 g, 68.2%.

<sup>1</sup>H NMR (500 MHz, THF-*d*<sub>8</sub>) δ 8.85 (d, *J* = 9.6 Hz, 2H), 8.28 – 7.59 (m, 5H), 7.41 (ddd, *J* = 35.6, 7.4, 3.5 Hz, 2H).

#### 2-((2,6-dimethoxybiphenyl)(phenyl)phosphino)-4-phenylbenzenesulfonic acid (L2)

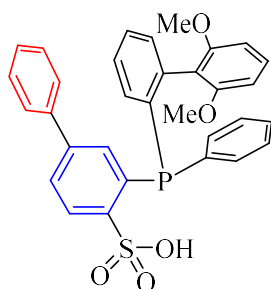

A flask was charged with 4-phenylbenzenesulfonic acid (5.62 g, 24.0 mmol, dehydrated) and THF (60 mL), cooled to 0 °C, stirred for 10 min, and nBuLi (19.2 mL of a 2.5 M solution in hexane, 48.0 mmol) was added dropwise. The mixture was warmed to 25°C and stirred for 2 h. A second flask was charged with THF (60 mL) and PPhCl<sub>2</sub> (3.25 mL, 24 mmol), cooled to -78°C, and the solution of dilithiated p-toluenesulfonic acid was added and then stirred at -78°C for 1.5 h. A third flask was charged with THF (300 mL) and 2'-bromo-2,6-dimethoxybiphenyl (7.0 g, 24.0 mmol), cooled to -78°C, and nBuLi (11.2 mL of a 2.5 M solution in hexane, 28.0 mmol) was added dropwise. The mixture was kept at -78°C for 1 h and then transferred to the second flask at -78°C. The mixture was warmed to room temperature and stirred over night. The volatiles were removed under vacuum and the residue was taken up in water (200 mL). The aqueous mixture was acidified with dilute HCl to pH~2. The mixture was extracted with CH<sub>2</sub>Cl<sub>2</sub> (3 × 50 mL) and the extracts were combined, dried over Na<sub>2</sub>SO<sub>4</sub>, and evaporated under vacuum to yield a solid. The solid was slurried with 10 mL DCM and 20 mL Et<sub>2</sub>O, filtrated and dried to afford a white powder L2·0.5 CH<sub>2</sub>Cl<sub>2</sub>. Yield 7.2 g, 54.2%.



$^1\text{H}$  NMR (500 MHz, Chloroform-*d*)  $\delta$  8.45 – 8.29 (m, 1H), 7.94 (d,  $J = 8.1$  Hz, 1H), 7.77 (s, 1H), 7.61 (s, 1H), 7.43 (d,  $J = 41.5$  Hz, 14H), 6.47 (t,  $J = 7.0$  Hz, 2H), 5.30 (s, 1H), 3.66 (s, 3H), 3.33 (s, 3H).

HRMS (AP-MALDI):  $m/z$  calcd for  $\text{C}_{32}\text{H}_{27}\text{O}_5\text{PS}$ : 555.1390 [M+H]; found: 555.1386.

### (P(2,6-diOMePh-Ph)<sub>2</sub>(2-SO<sub>3</sub>-5-Ph-Ph))Pd(Me)(Py) (Pd2)

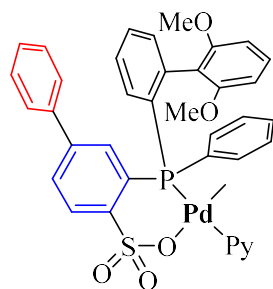

A flask was charged with **L2** (554.60 mg, 1.0 mmol), (TMEDA)PdMe<sub>2</sub> (252.7 mg, 1.0 mmol) and THF (10 mL). The mixture was stirred at room temperature for 1 h, then pyridine (395.5 mg, 5 mmol) was added and stirred for 1 h. Et<sub>2</sub>O (30 mL) was added to precipitate the solid at  $-25^\circ\text{C}$ . The solid was filtrated, washed with Et<sub>2</sub>O and dried under vacuum to afford a white powder. Yield: 0.59 g, 78.4%.

$^1\text{H}$  NMR (500 MHz, Methylene Chloride-*d*<sub>2</sub>)  $\delta$  8.38 (s, 2H), 8.27 (dd,  $J = 8.1, 4.5$  Hz, 1H), 7.87 – 7.75 (m, 2H), 7.63 (s, 3H), 7.46 – 7.30 (m, 14H), 7.26 (s, 1H), 6.58 – 6.44 (m, 2H), 3.62 (s, 3H), 2.76 (s, 3H), 0.39 (s, 3H).

$^{13}\text{C}$  NMR (126 MHz, Methylene Chloride-*d*<sub>2</sub>)  $\delta$  158.46, 157.69, 150.93, 148.42, 148.31, 142.73, 142.26, 142.13, 139.55, 138.51, 136.31, 135.04, 133.76, 133.44, 133.11, 131.33, 130.27, 130.16, 129.78, 129.36, 128.84, 128.50, 127.23, 126.71, 125.12, 118.35, 104.59, 102.74, 56.32, 54.41, -1.59.

Anal. Calcd. for  $\text{C}_{38}\text{H}_{33}\text{NO}_5\text{PPdS}$ : C, 60.6; H, 4.42 Found: C, 58.82; H, 4.60.

### General procedure for homopolymerization

A 1000 mL stainless steel reactor was charged with toluene (400 mL) and desired amount of Pd complex in 2 mL CH<sub>2</sub>Cl<sub>2</sub>. The pressure vessel was connected to a high pressure line and the solution was degassed. The reactor was warmed to the desired temperature using an water bath. The reactor was pressurized and maintained at the desired pressure of ethylene. After desired amount of time, the reactor was vented and the polymer was precipitated in ethanol (400 mL), filtrated and dried at 80 °C for 24 h under vacuum.

### General procedure for copolymerization and terpolymerization

A 1000 mL stainless steel reactor was charged with toluene (200 mL), polar monomer, BHT (2 mg) in toluene (2 mL) and desired amount of Pd complex in 2 mL CH<sub>2</sub>Cl<sub>2</sub>. The pressure vessel was connected to a high pressure line and the solution was degassed. The reactor was warmed to the desired temperature using an water bath. The

reactor was pressurized and maintained at the desired pressure of ethylene. After desired amount of time, the reactor was vented and the polymer was precipitated in ethanol (400 mL), filtrated and dried at 80 °C for 24 h under vacuum.

### **Computational Methods**

Density functional theory (DFT) calculations were performed using the Gaussian 09 Program, revision E.01.<sup>[9]</sup> DFT calculations for structure optimizations were performed with the B3LYP functional<sup>[10]</sup> with empirical dispersion correction, DFT-D3<sup>[11]</sup>, the Lanl2dz basis set<sup>[12]</sup> for palladium, and the 6-31G(d) basis set<sup>[13]</sup> for the light atoms (C, H, O, N, P and S). Single point calculations were performed with the B3LYP functional with empirical dispersion correction, DFT-D3, the SDD basis set<sup>[14]</sup> for palladium, and the 6-311G(d,p) basis sets<sup>[15]</sup> for the light atoms. The solvation effect of toluene ( $\epsilon = 2.37$ ) was considered through the SMD model<sup>[16]</sup> in single-point calculations. Electrostatic potential (ESP) maps were performed by Multiwfn<sup>[17]</sup> and VMD<sup>[18]</sup>. Steric maps were drawn by Sambvca 2.1<sup>[19]</sup> based on the DFT optimized structures or molecular structures from X-ray diffraction analysis of single crystals.

Equations to calculate comonomer incorporation ratio,  $U_{\text{int}}$ , and number of branches

For PE<sup>[20-25]</sup>:

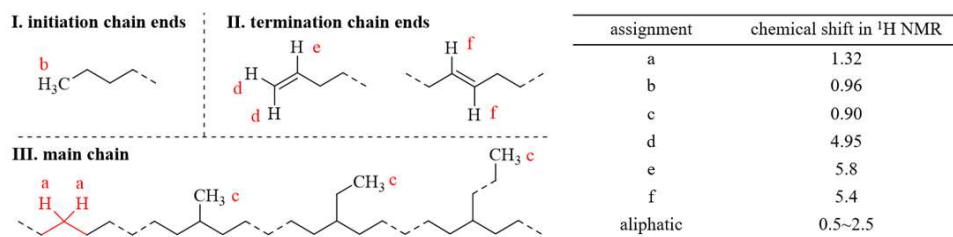

$$B = \frac{\frac{I_b + I_c}{3} - \frac{I_d + I_f}{2}}{\frac{I_b + I_c}{3} + \frac{I_a}{2}} \times 1000$$

number of branches<sup>[26]</sup>

$$\text{internal unsaturation}^{[27]} U_{\text{int}} = \frac{I_f}{I_d + I_f} \times 100\%$$

For copolymers and terpolymers:

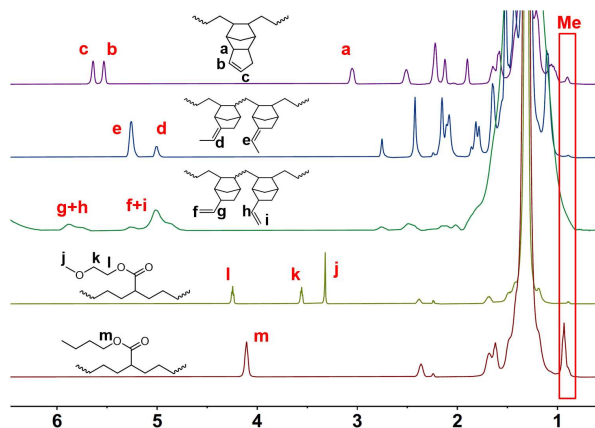

$$\text{EBA: Incorporation ratio of BA } x = \frac{\frac{I_m}{2}}{\frac{I_{\text{aliphatic}}}{4} - \frac{I_m}{2} \times 10 + \frac{I_m}{2}} \times 100\%$$

$$\text{E-EGMA: Incorporation ratio of EGMA } x_{\text{EGMA}} = \frac{\frac{I_l}{2}}{\frac{I_{\text{aliphatic}}}{4} - \frac{I_l}{2} \times 3 + \frac{I_l}{2}} \times 100\%$$

$$\text{E-ENB: Incorporation ratio of ENB } x_{\text{ENB}} = \frac{I_{\text{e+d}}}{\frac{I_{\text{aliphatic}} - I_{\text{e+d}} \times 11}{4} + I_{\text{e+d}}} \times 100\%$$

$$\text{E-VNB: Incorporation ratio of VNB } x_{\text{VNB}} = \frac{\frac{I_{\text{f+g+h+i}}}{3}}{\frac{I_{\text{aliphatic}} - \frac{I_{\text{f+g+h+i}}}{3} \times 9}{4} + \frac{I_{\text{f+g+h+i}}}{3}} \times 100\%$$

$$\text{E-DCPD: Incorporation ratio of DCPD } x_{\text{DCPD}} = \frac{I_{\text{a}}}{\frac{I_{\text{aliphatic}} - I_{\text{a}} \times 9}{4} + I_{\text{a}}} \times 100\%$$

$$\text{E-BA-EGMA: Incorporation ratio of BA } x_{\text{BA}} = \frac{\frac{I_{\text{m}}}{2}}{\frac{I_{\text{aliphatic}} - \frac{I_{\text{m}}}{2} \times 10 - \frac{I_{\text{l}}}{2} \times 3}{4} + \frac{I_{\text{m}}}{2} + \frac{I_{\text{l}}}{2}} \times 100\%$$

$$\text{Incorporation ratio of EGMA } x_{\text{EGMA}} = \frac{\frac{I_{\text{l}}}{2}}{\frac{I_{\text{aliphatic}} - \frac{I_{\text{m}}}{2} \times 10 - \frac{I_{\text{l}}}{2} \times 3}{4} + \frac{I_{\text{m}}}{2} + \frac{I_{\text{l}}}{2}} \times 100\%$$

$$\text{E-BA-VNB: Incorporation ratio of BA } x_{\text{BA}} = \frac{\frac{I_{\text{m}}}{2}}{\frac{I_{\text{aliphatic}} - \frac{I_{\text{m}}}{2} \times 10 - \frac{I_{\text{f+g+h+i}}}{3} \times 9}{4} + \frac{I_{\text{m}}}{2} + \frac{I_{\text{f+g+h+i}}}{3}} \times 100\%$$

$$\text{Incorporation ratio of VNB } x_{\text{VNB}} = \frac{\frac{I_{\text{f+g+h+i}}}{3}}{\frac{I_{\text{aliphatic}} - \frac{I_{\text{m}}}{2} \times 10 - \frac{I_{\text{f+g+h+i}}}{3} \times 9}{4} + \frac{I_{\text{m}}}{2} + \frac{I_{\text{f+g+h+i}}}{3}} \times 100\%$$

$$\text{E-BA-ENB: Incorporation ratio of BA } x_{\text{BA}} = \frac{\frac{I_{\text{m}}}{2}}{\frac{I_{\text{aliphatic}} - \frac{I_{\text{m}}}{2} \times 10 - I_{\text{e+d}} \times 11}{4} + \frac{I_{\text{m}}}{2} + I_{\text{e+d}}} \times 100\%$$

$$\text{Incorporation ratio of ENB } x_{\text{ENB}} = \frac{I_{\text{e+d}}}{\frac{I_{\text{aliphatic}} - \frac{I_{\text{m}}}{2} \times 10 - I_{\text{e+d}} \times 11}{4} + \frac{I_{\text{m}}}{2} + I_{\text{e+d}}} \times 100\%$$

$$\text{E-BA-DCPD: Incorporation ratio of BA } x_{\text{BA}} = \frac{\frac{I_{\text{m}}}{2}}{\frac{I_{\text{aliphatic}} - \frac{I_{\text{m}}}{2} \times 10 - I_{\text{a}} \times 9}{4} + \frac{I_{\text{m}}}{2} + I_{\text{a}}} \times 100\%$$

$$\text{Incorporation ratio of DCPD } x_{\text{DCPD}} = \frac{I_{\text{a}}}{\frac{I_{\text{aliphatic}} - \frac{I_{\text{m}}}{2} \times 10 - I_{\text{a}} \times 9}{4} + \frac{I_{\text{m}}}{2} + I_{\text{a}}} \times 100\%$$

# NMR spectra of prepared compounds

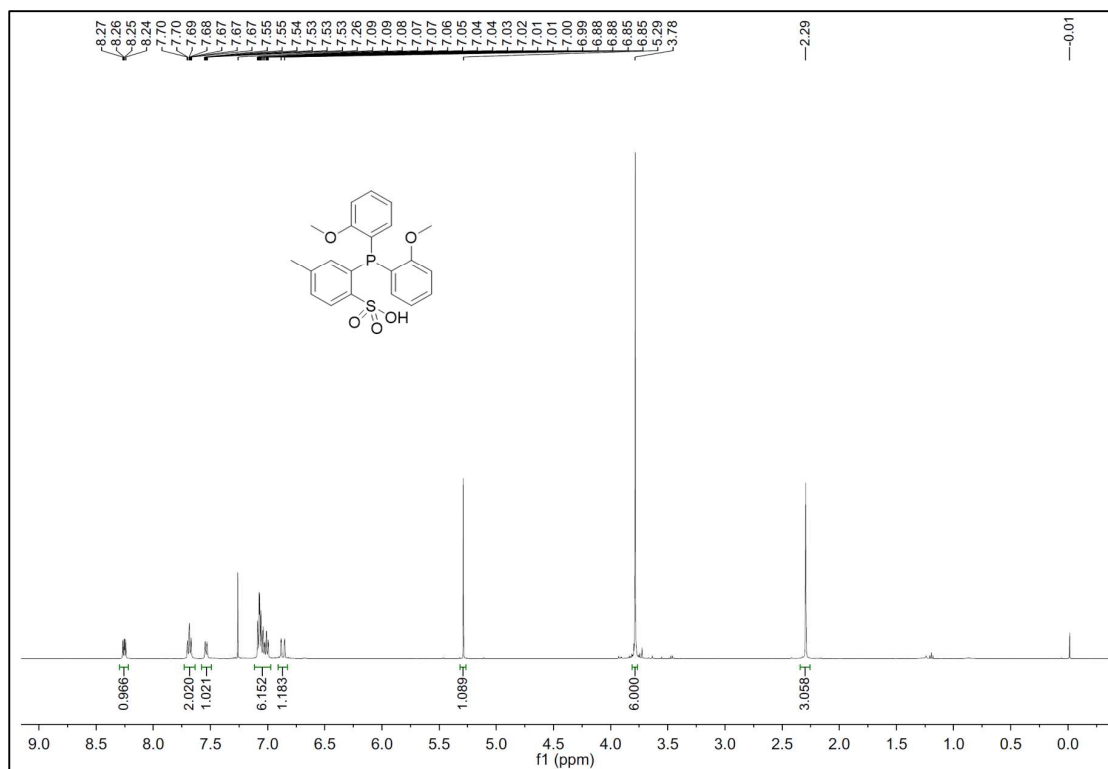

**<sup>1</sup>H NMR spectrum of L3·0.5CH<sub>2</sub>Cl<sub>2</sub> (in CDCl<sub>3</sub>)**

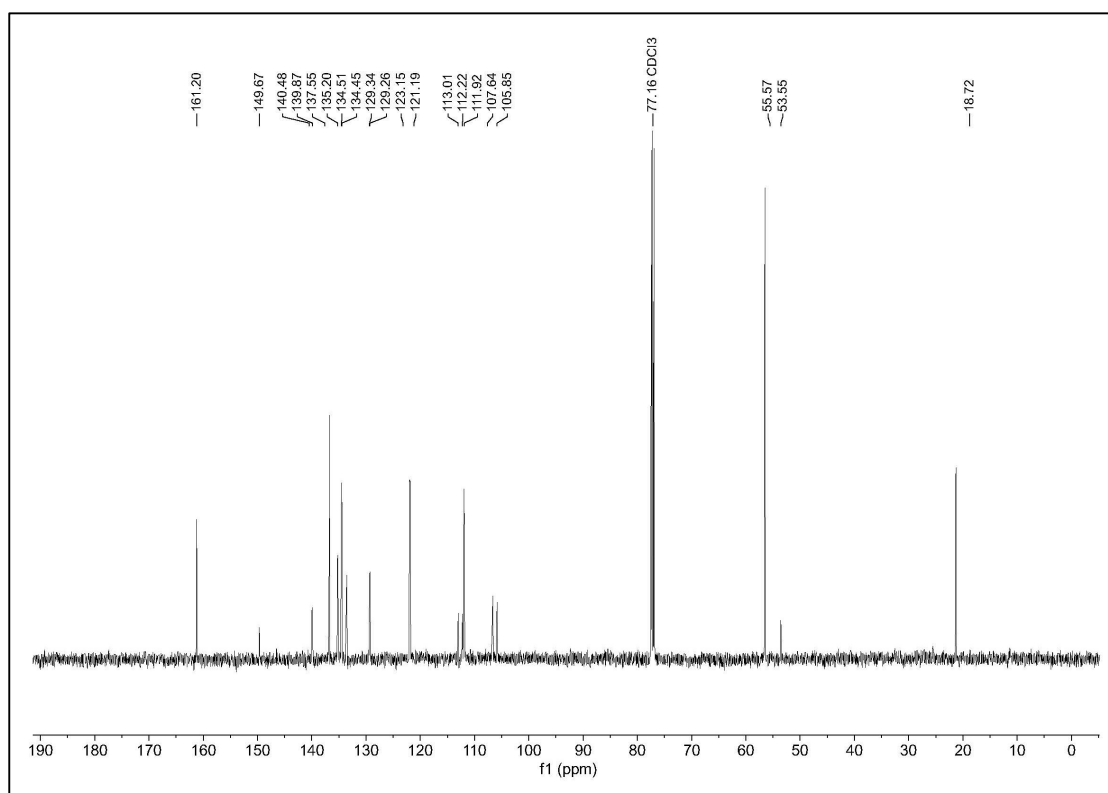

**<sup>13</sup>C NMR spectrum of L3·0.5CH<sub>2</sub>Cl<sub>2</sub> (in CDCl<sub>3</sub>)**

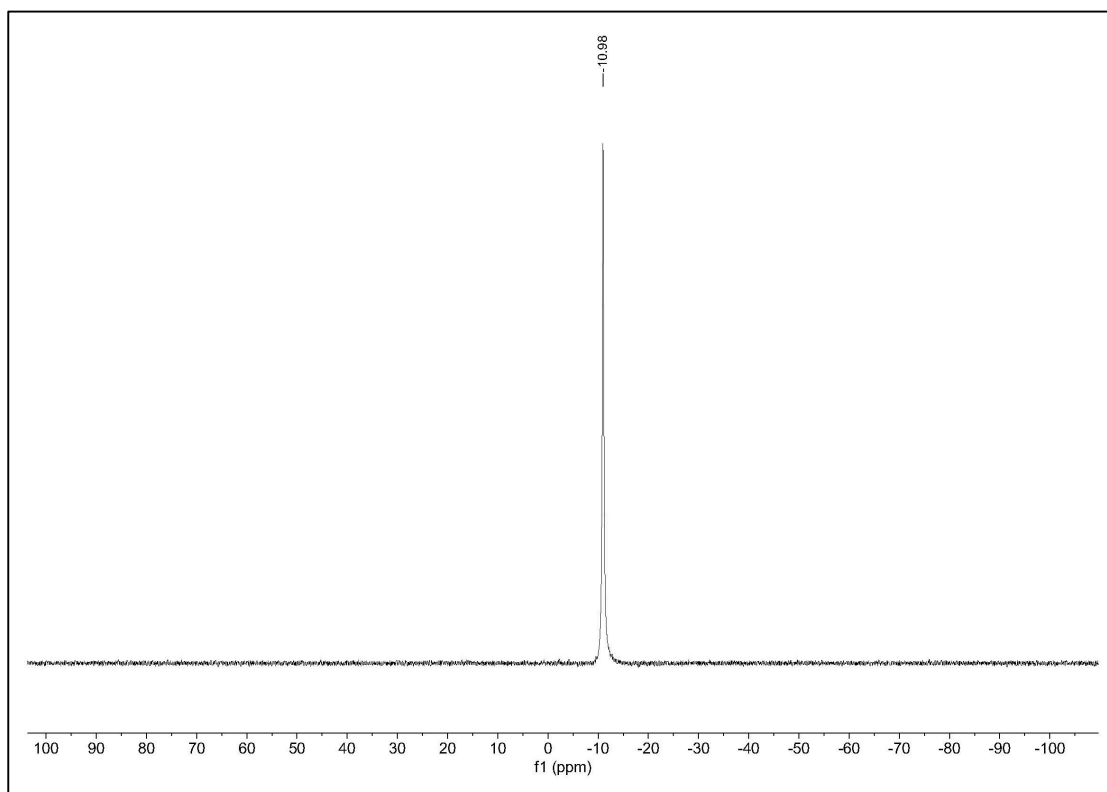

$^{31}\text{P}$  NMR spectrum of  $\text{L3} \cdot 0.5\text{CH}_2\text{Cl}_2$  (in  $\text{CDCl}_3$ )

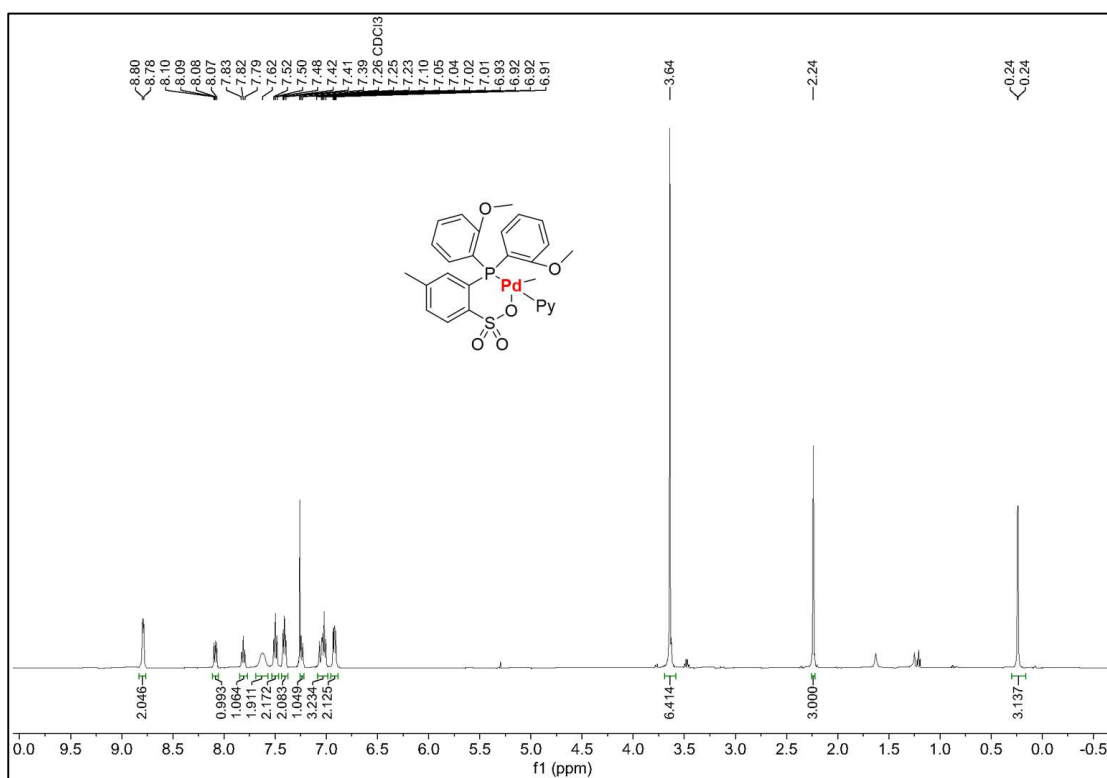

$^1\text{H}$  NMR spectrum of  $\text{Pd3}$  (in  $\text{CDCl}_3$ )

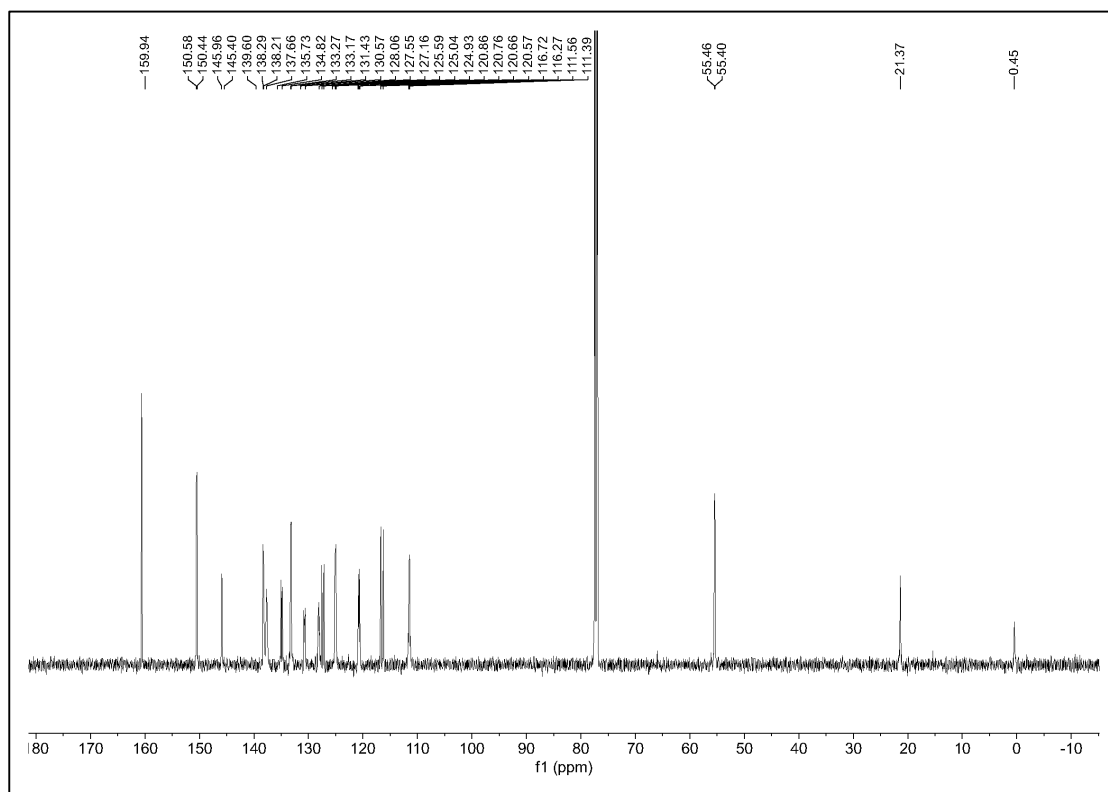

**<sup>13</sup>C NMR spectrum of Pd3 (in CDCl<sub>3</sub>)**

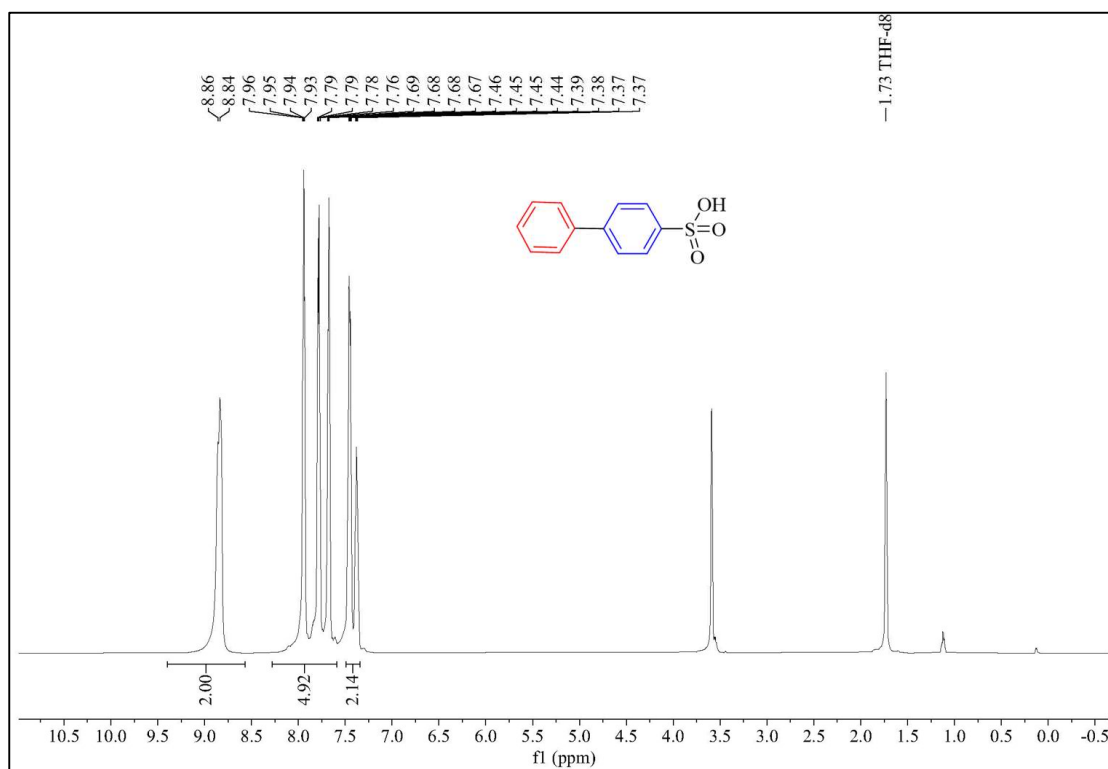

**<sup>1</sup>H NMR spectrum of L2 (in THF-*d*<sub>8</sub>)**

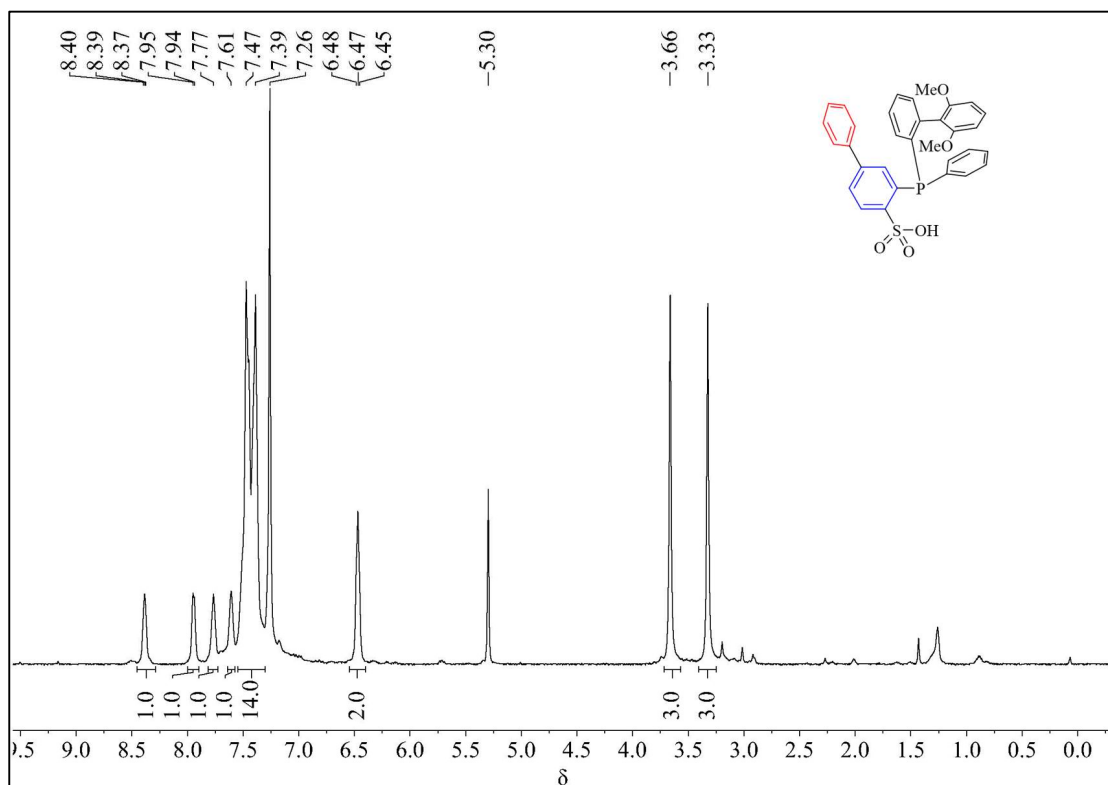

**<sup>1</sup>H NMR spectrum of L2 (in CDCl<sub>3</sub>)**

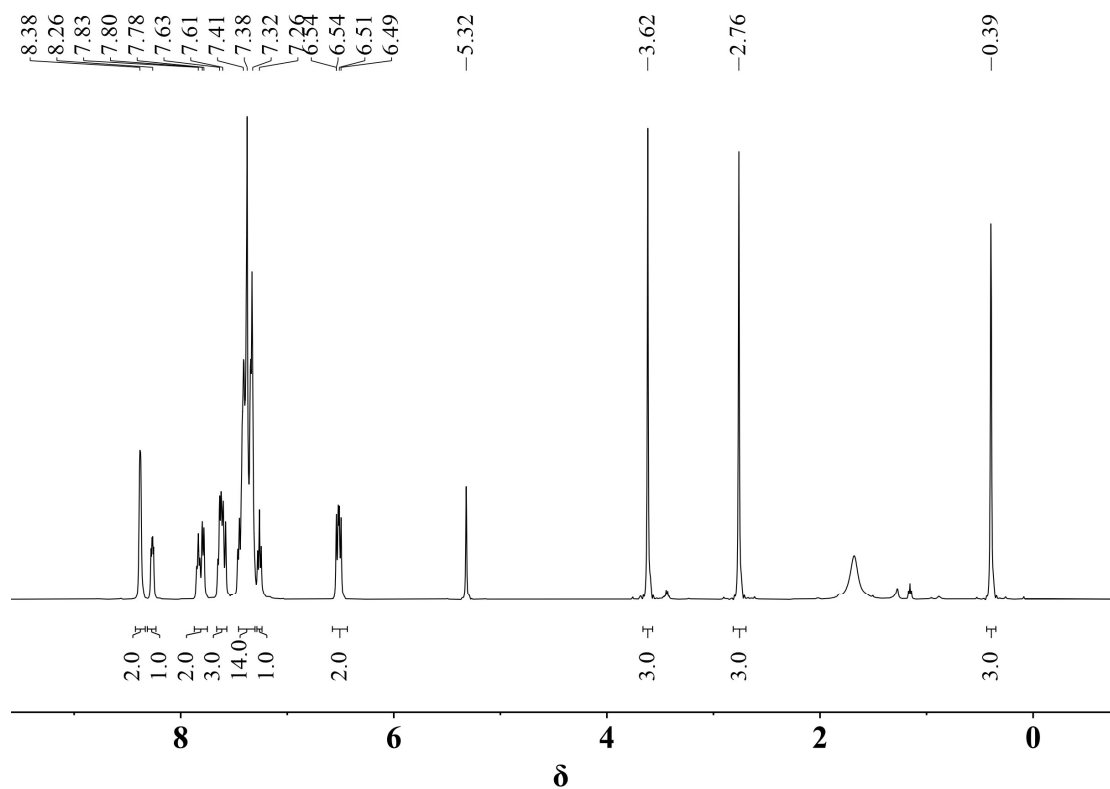

**<sup>1</sup>H NMR spectrum of Pd2 (in CD<sub>2</sub>Cl<sub>2</sub>)**



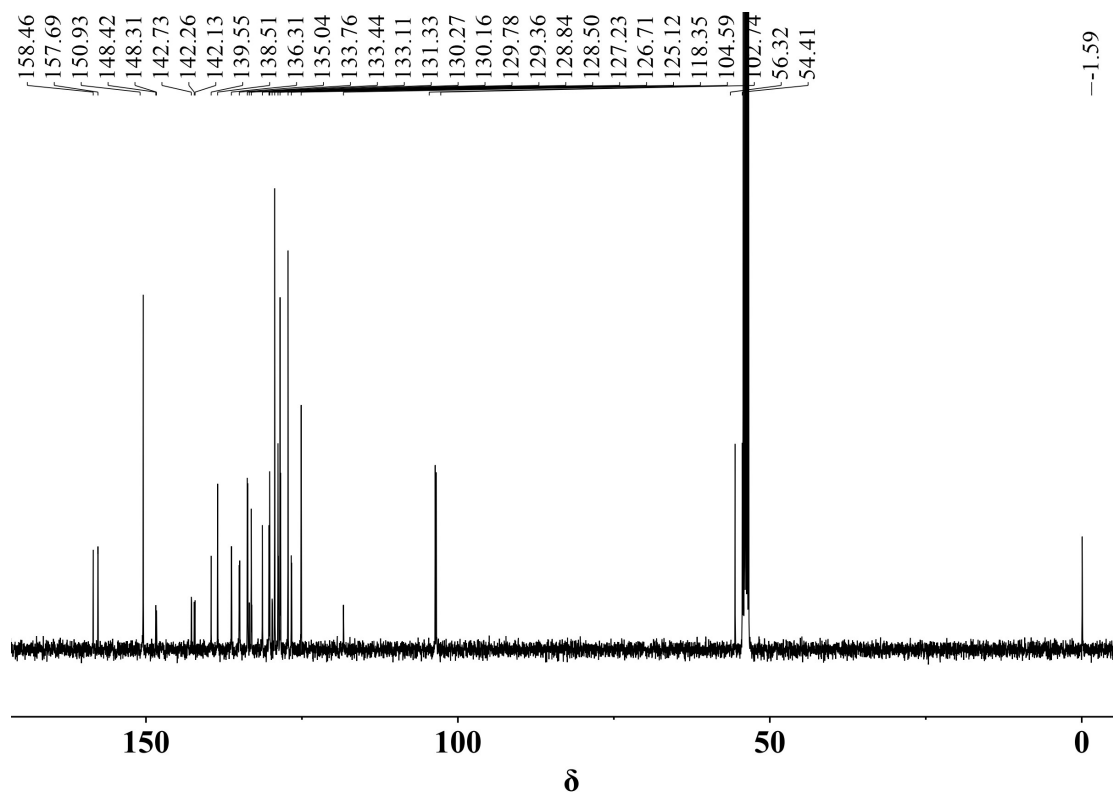

<sup>13</sup>C NMR spectrum of Pd2 (in CD<sub>2</sub>Cl<sub>2</sub>)

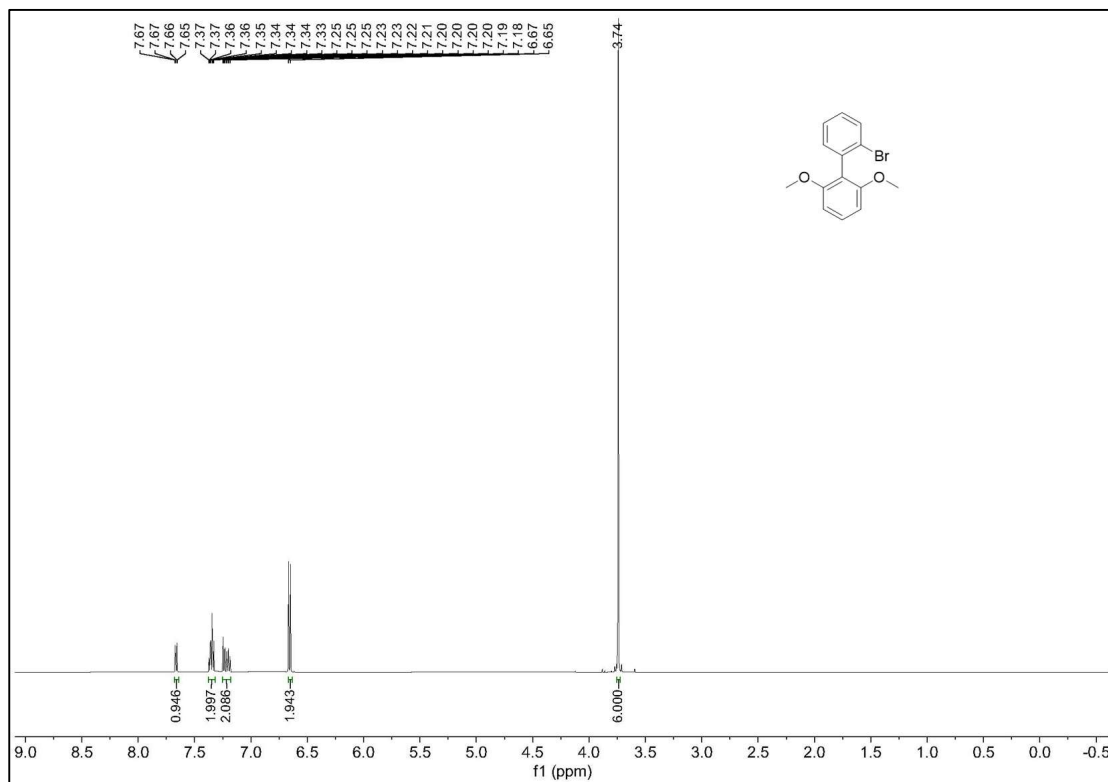

<sup>1</sup>H NMR spectrum of 2'-bromo-2,6-dimethoxybiphenyl (in CDCl<sub>3</sub>)

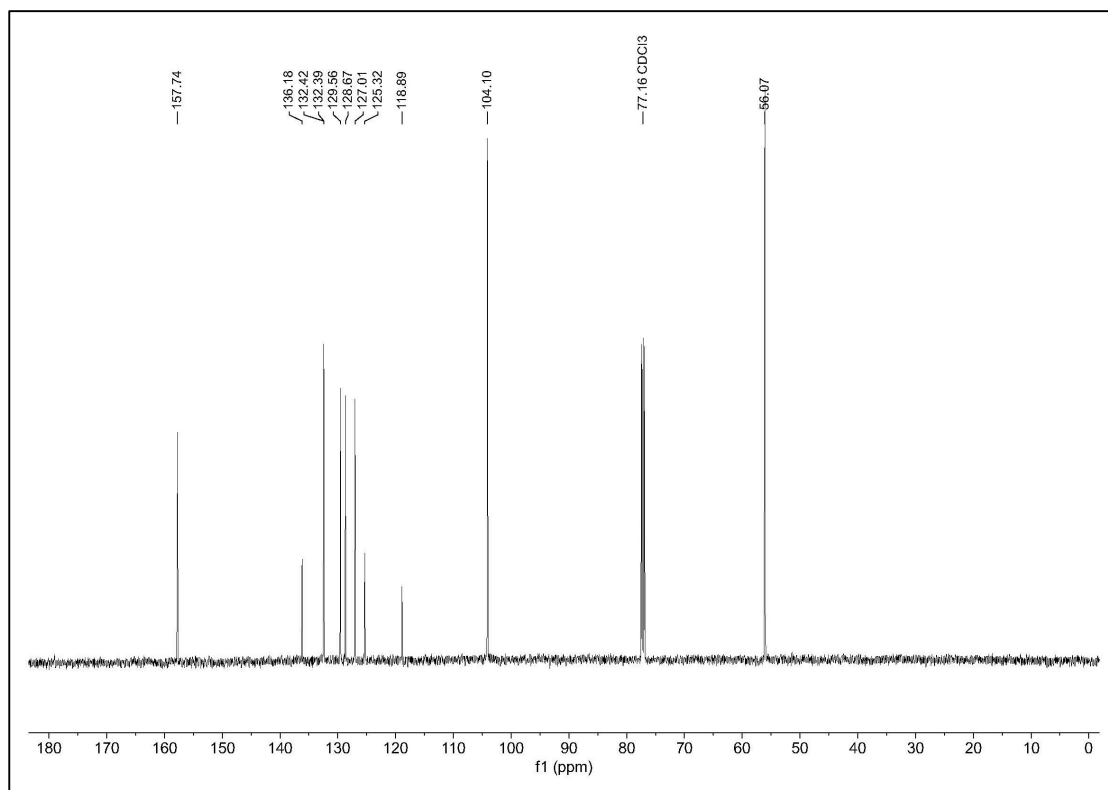

<sup>13</sup>C NMR spectrum of 2'-bromo-2,6-dimethoxybiphenyl (in CDCl<sub>3</sub>)

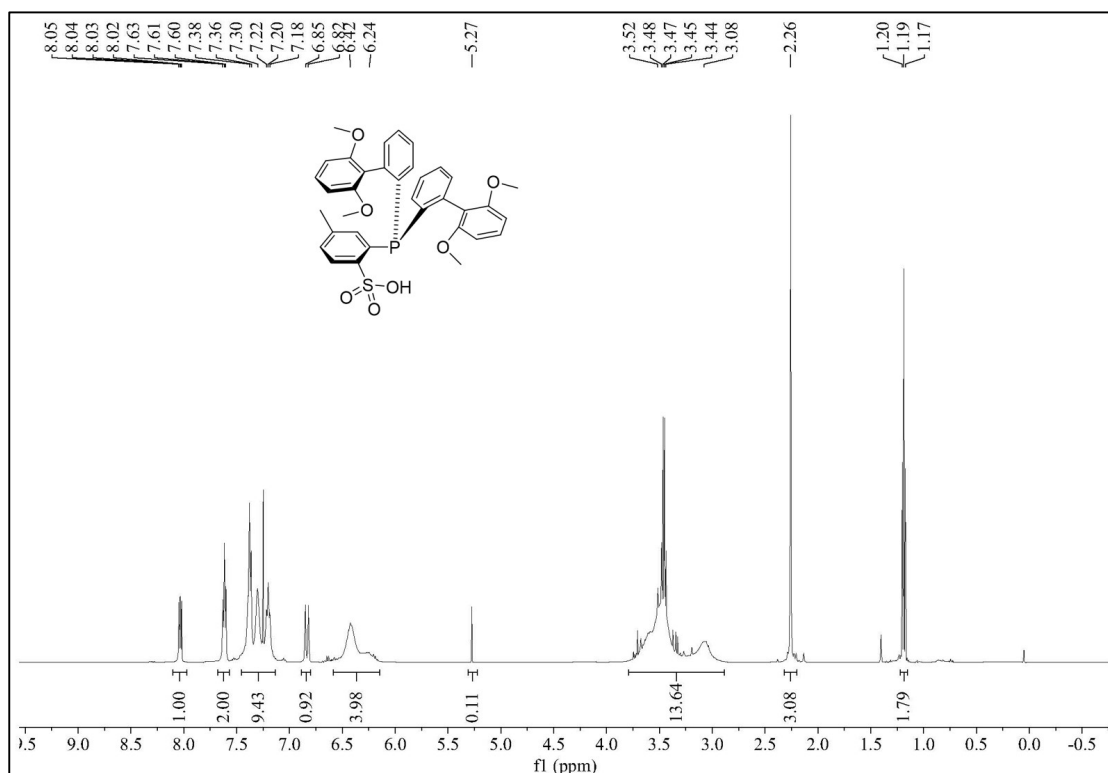

<sup>1</sup>H NMR spectrum of L4 (in CDCl<sub>3</sub>)

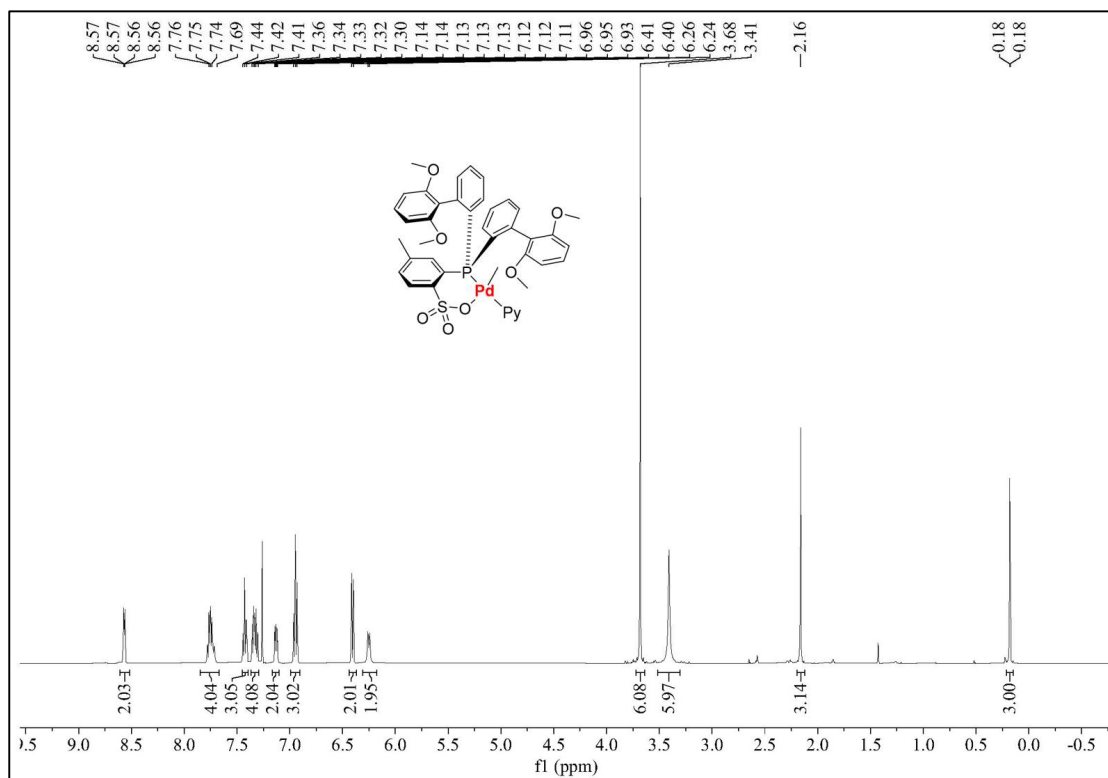

**<sup>1</sup>H NMR spectrum of Pd4 (in CDCl<sub>3</sub>)**

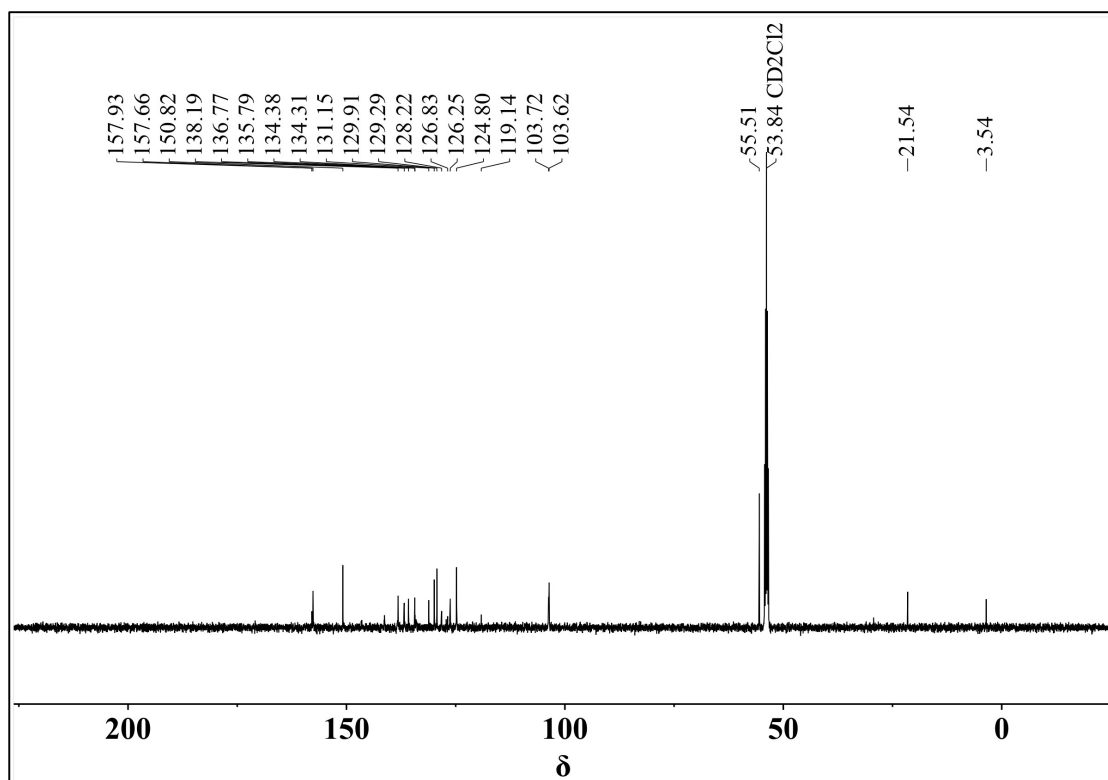

**<sup>13</sup>C NMR spectrum of Pd4 (in CD<sub>2</sub>Cl<sub>2</sub>)**

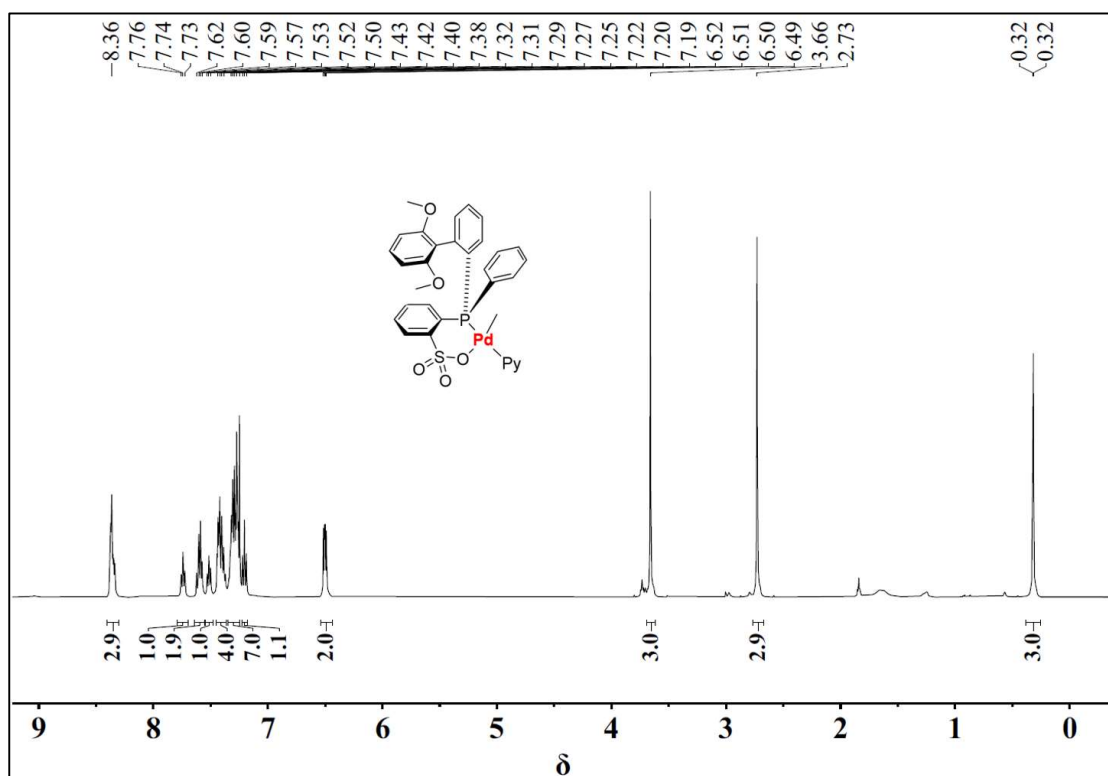

<sup>1</sup>H NMR spectrum of Pd5 (in CDCl<sub>3</sub>)

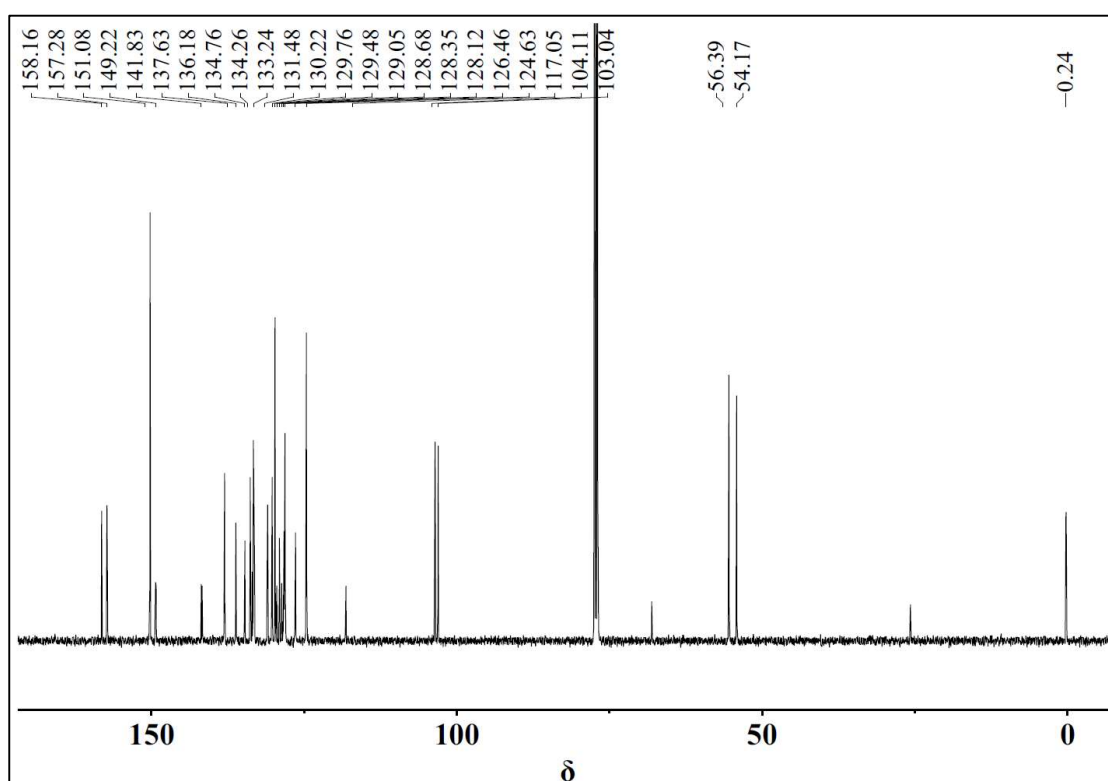

<sup>13</sup>C NMR spectrum of Pd5 (in CDCl<sub>3</sub>)

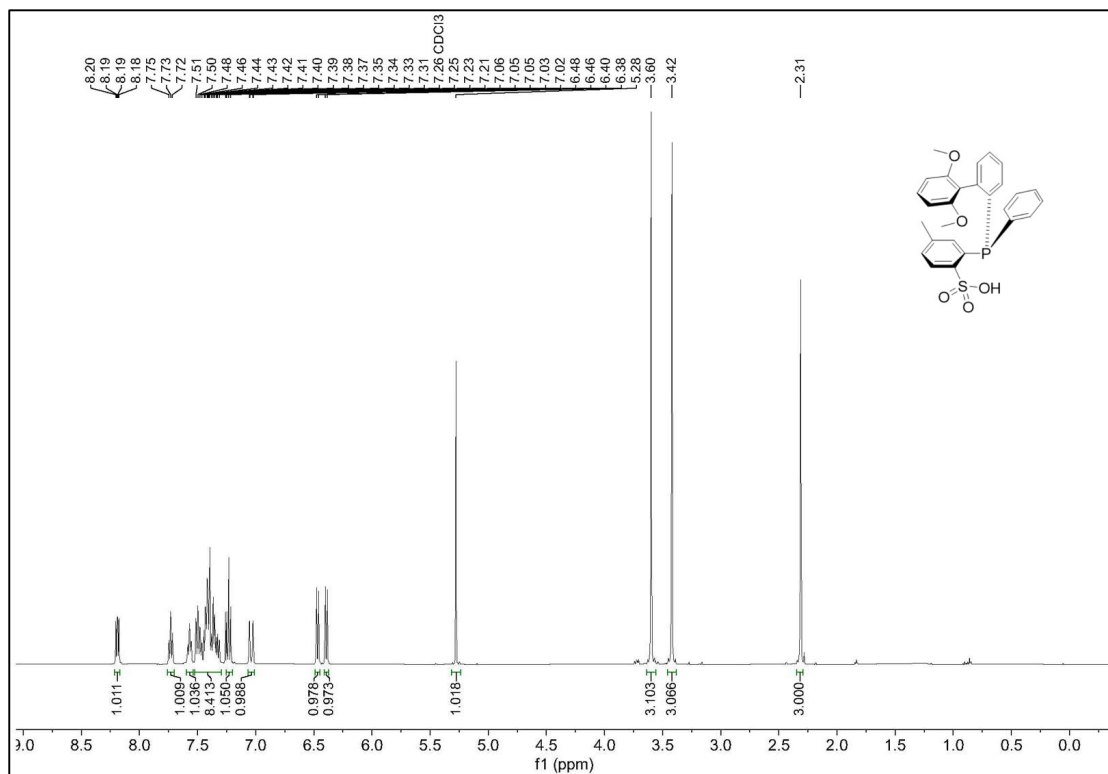

**<sup>1</sup>H NMR spectrum of L1 (in CDCl<sub>3</sub>)**

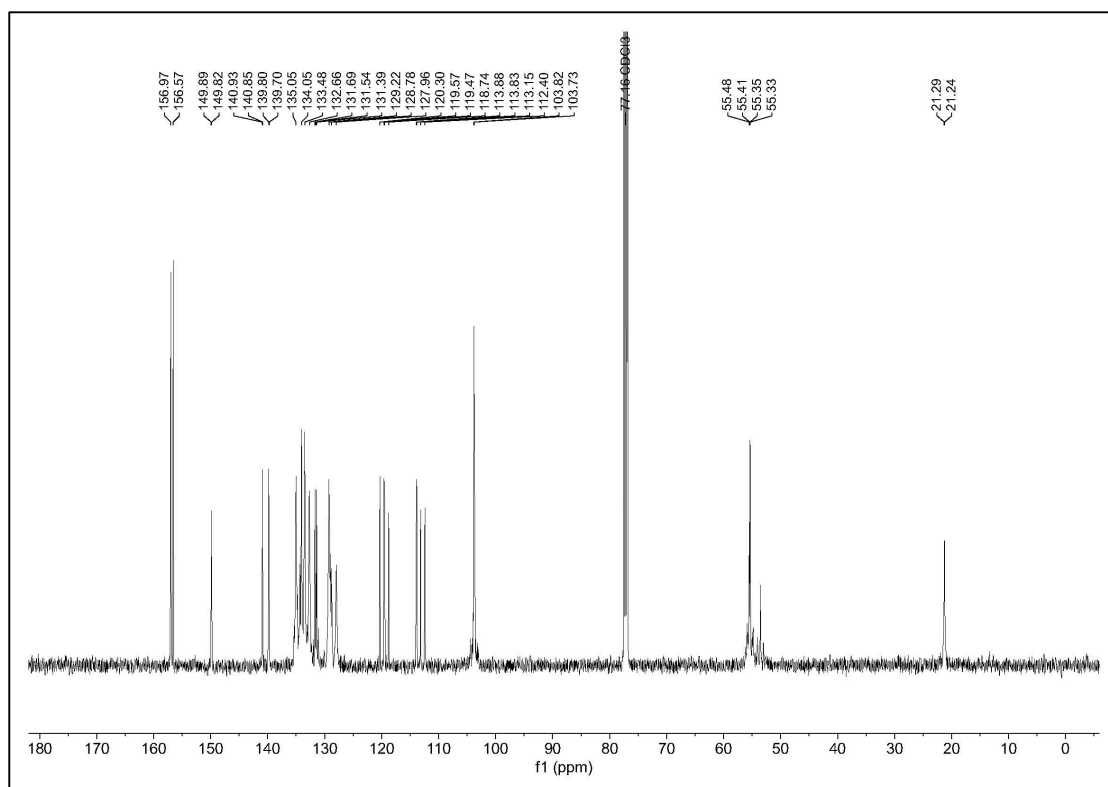

**<sup>13</sup>C NMR spectrum of L1 (in CDCl<sub>3</sub>)**

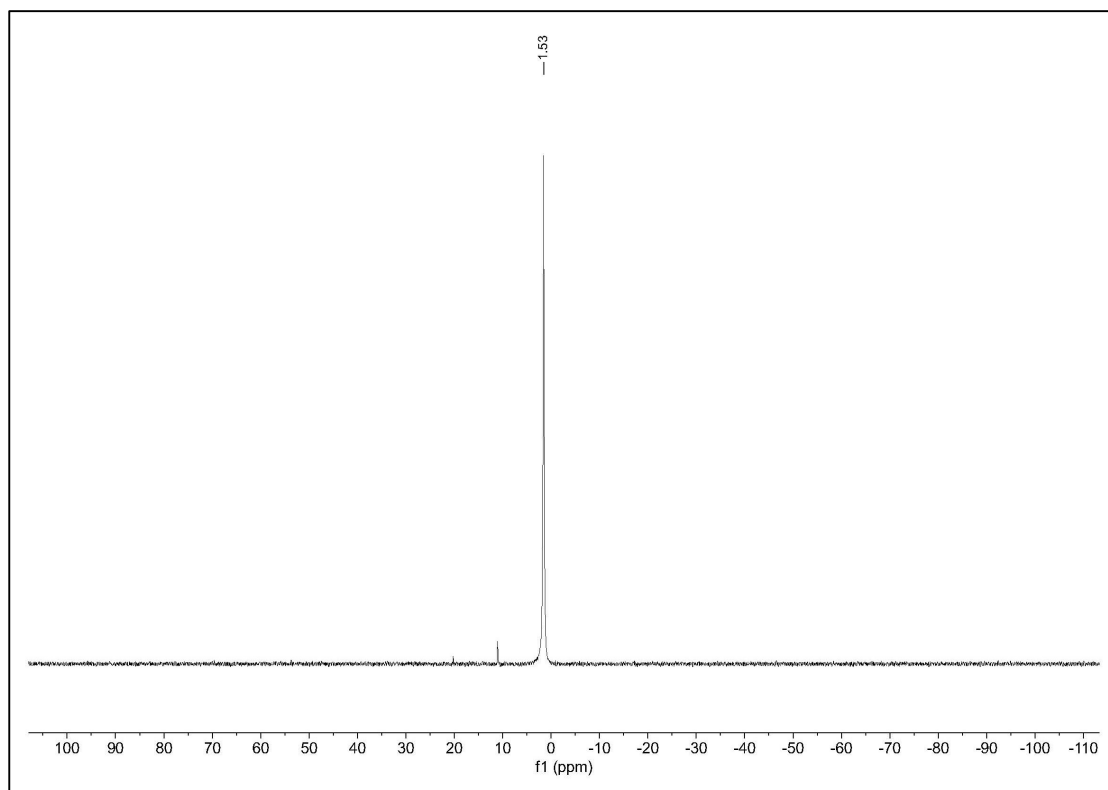

$^{31}\text{P}$  NMR spectrum of L1 (in  $\text{CDCl}_3$ )

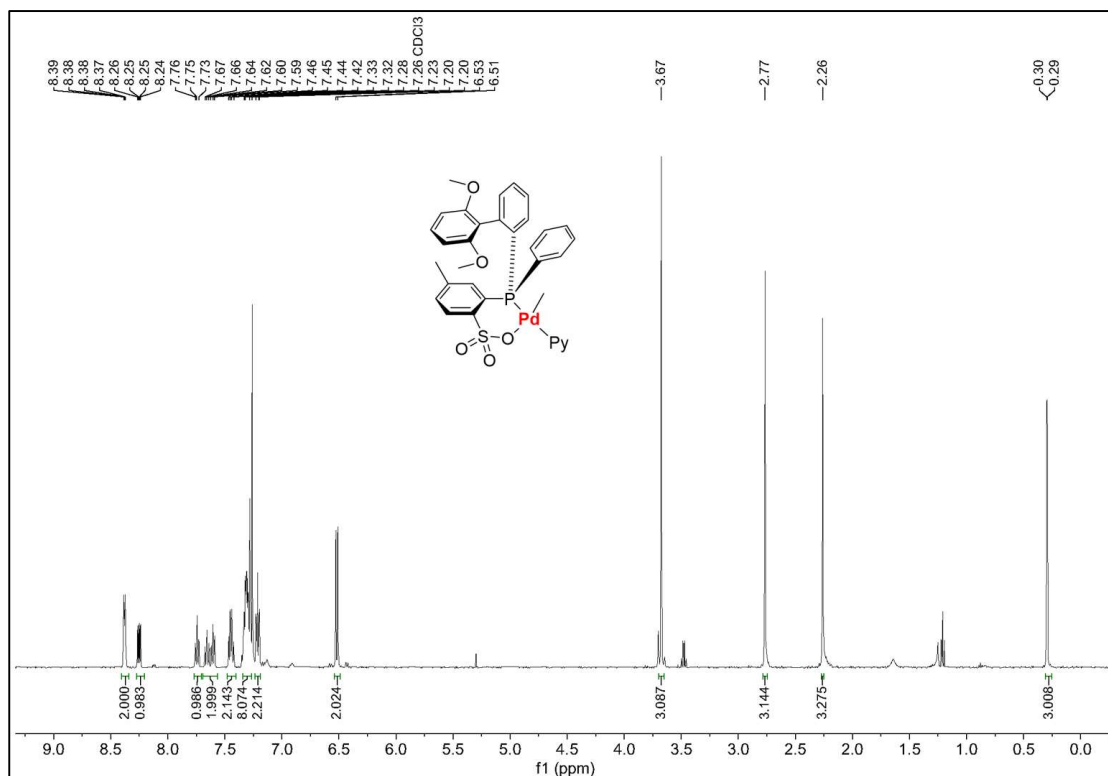

$^1\text{H}$  NMR spectrum of Pd1 (in  $\text{CDCl}_3$ )

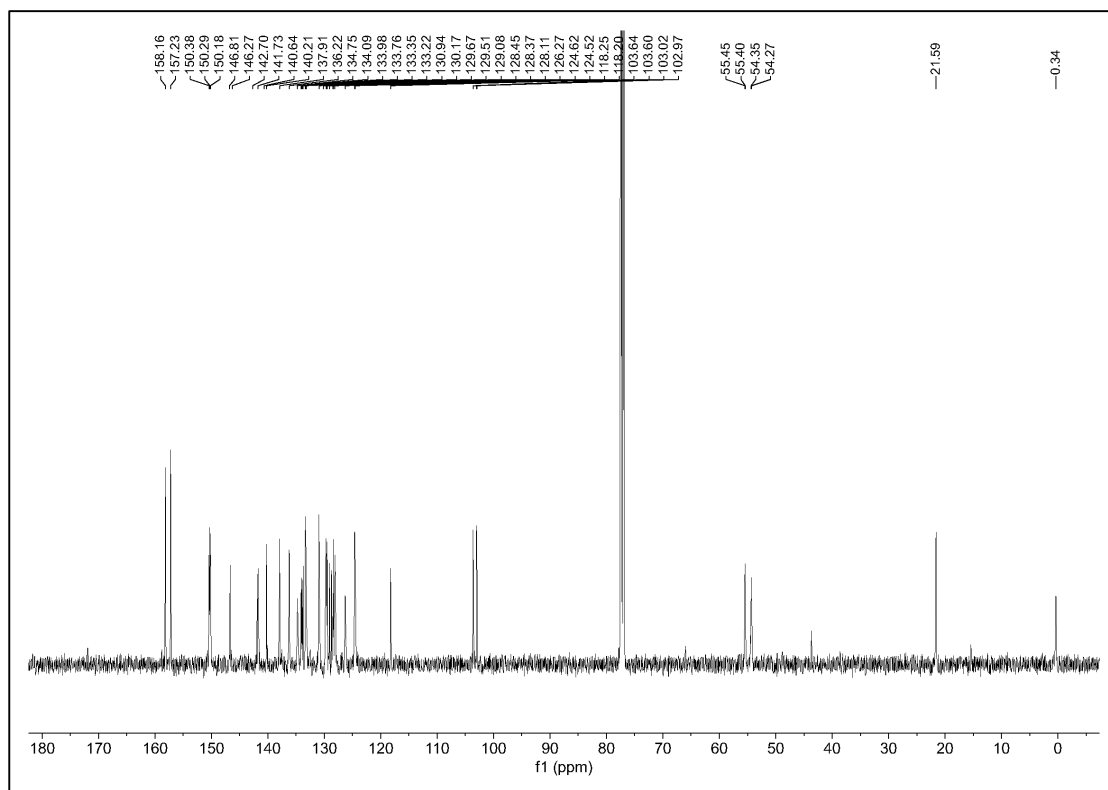

**$^{13}\text{C}$  NMR spectrum of Pd1 (in  $\text{CDCl}_3$ )**

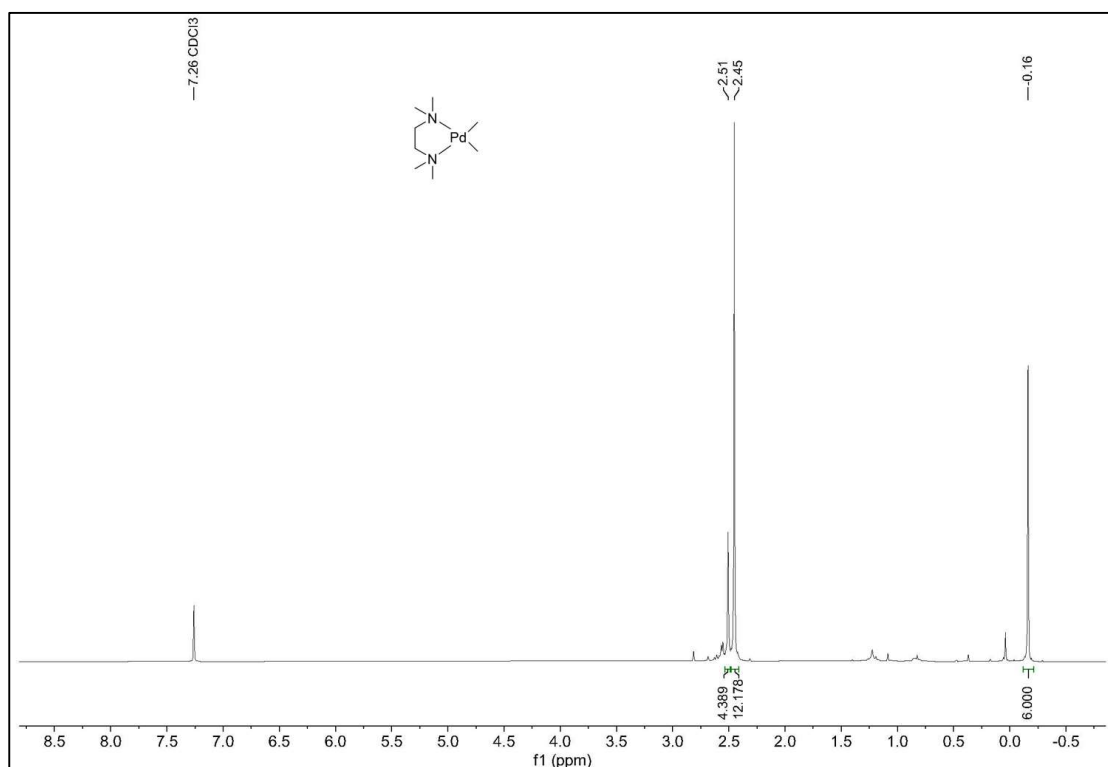

**$^1\text{H}$  NMR spectrum of (TMEDA)PdMe<sub>2</sub> (in  $\text{CDCl}_3$ )**

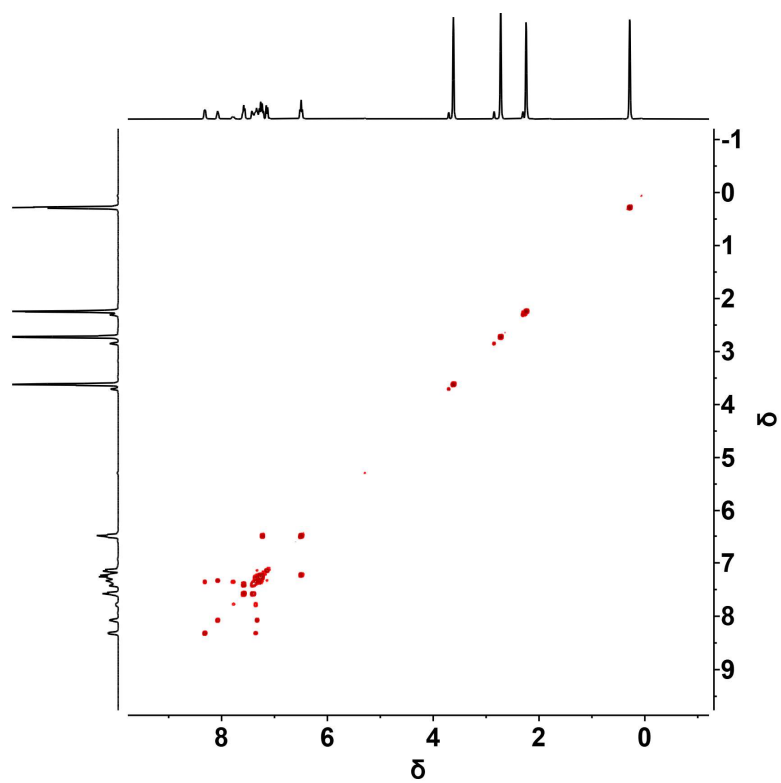

$^1\text{H}$ - $^1\text{H}$  COSY NMR spectrum of **Pd1** in  $\text{CD}_2\text{Cl}_2$  solution

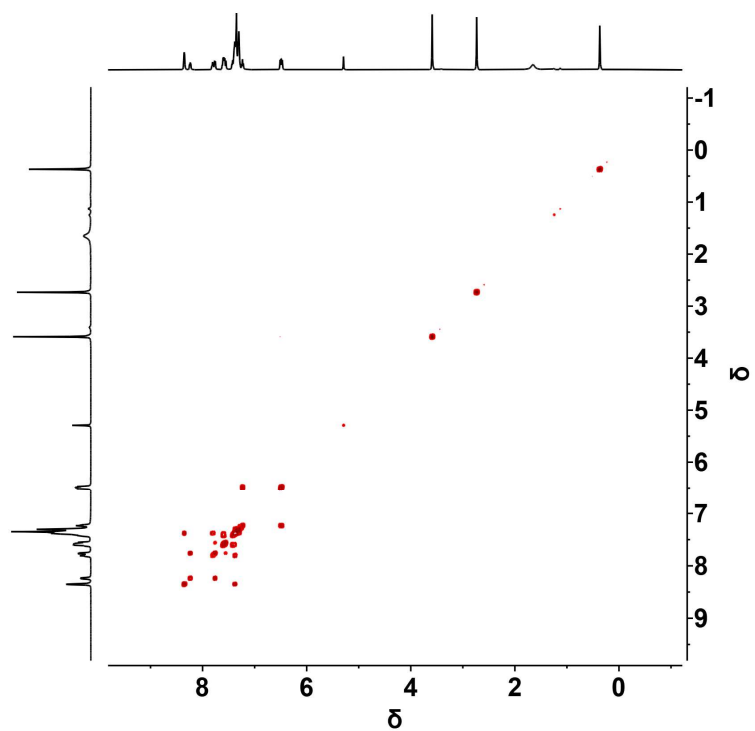

$^1\text{H}$ - $^1\text{H}$  COSY NMR spectrum of **Pd2** in  $\text{CD}_2\text{Cl}_2$  solution



# Topographic steric maps

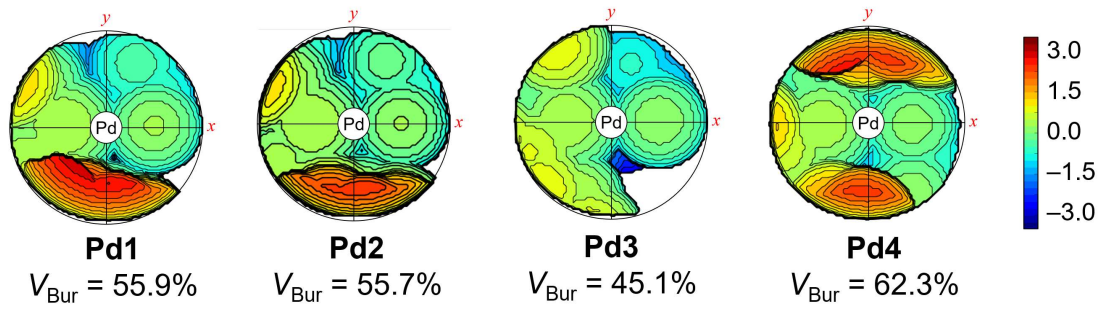

Topographic steric maps of Pd1, Pd2, Pd3, and Pd4.

# NMR spectra of polymers

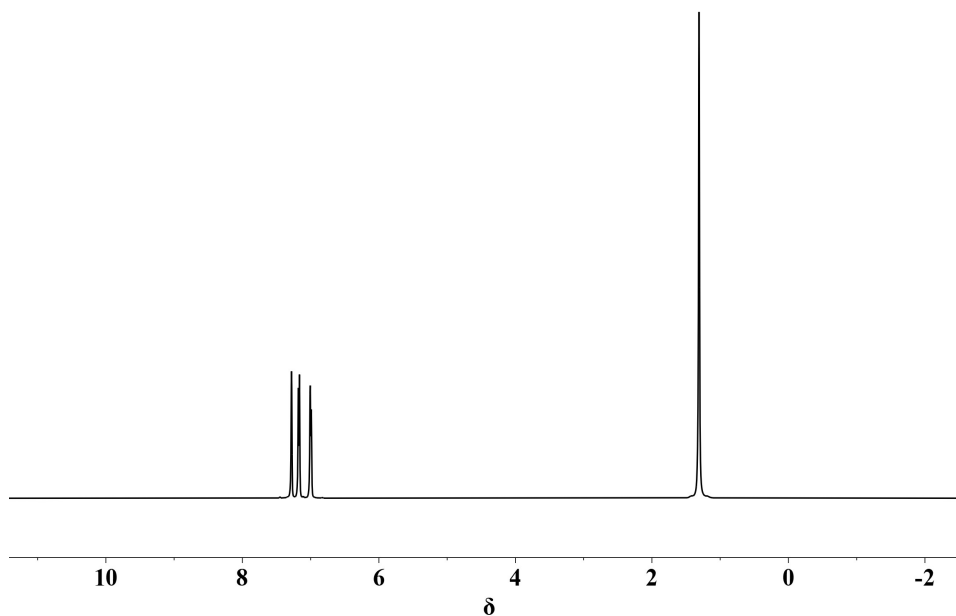

**$^1\text{H}$  NMR spectrum of highly linear PE in Table 1, Entry 11**

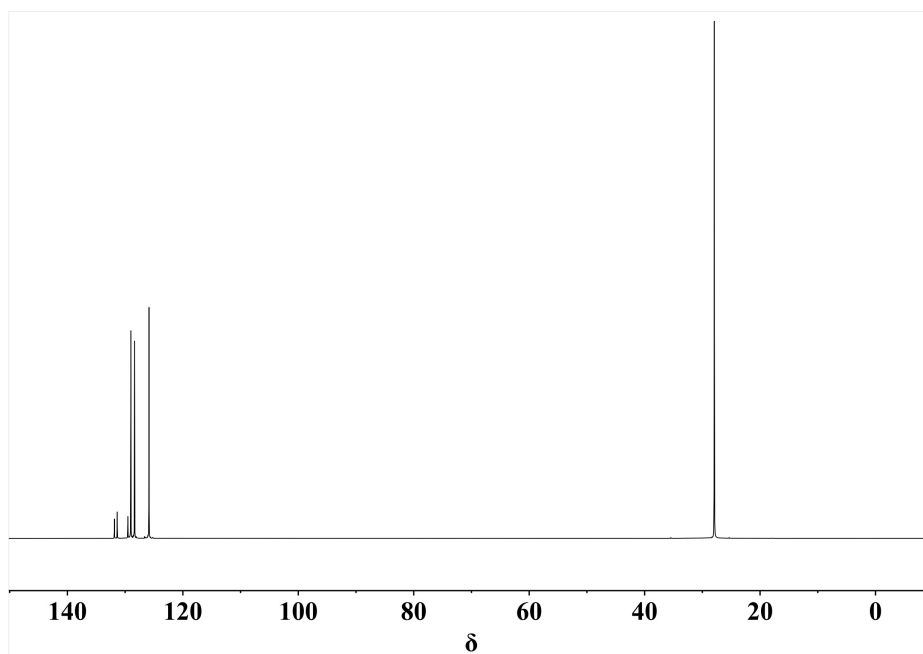

**$^{13}\text{C}$  NMR spectrum of highly linear PE in Table 1, Entry 11**

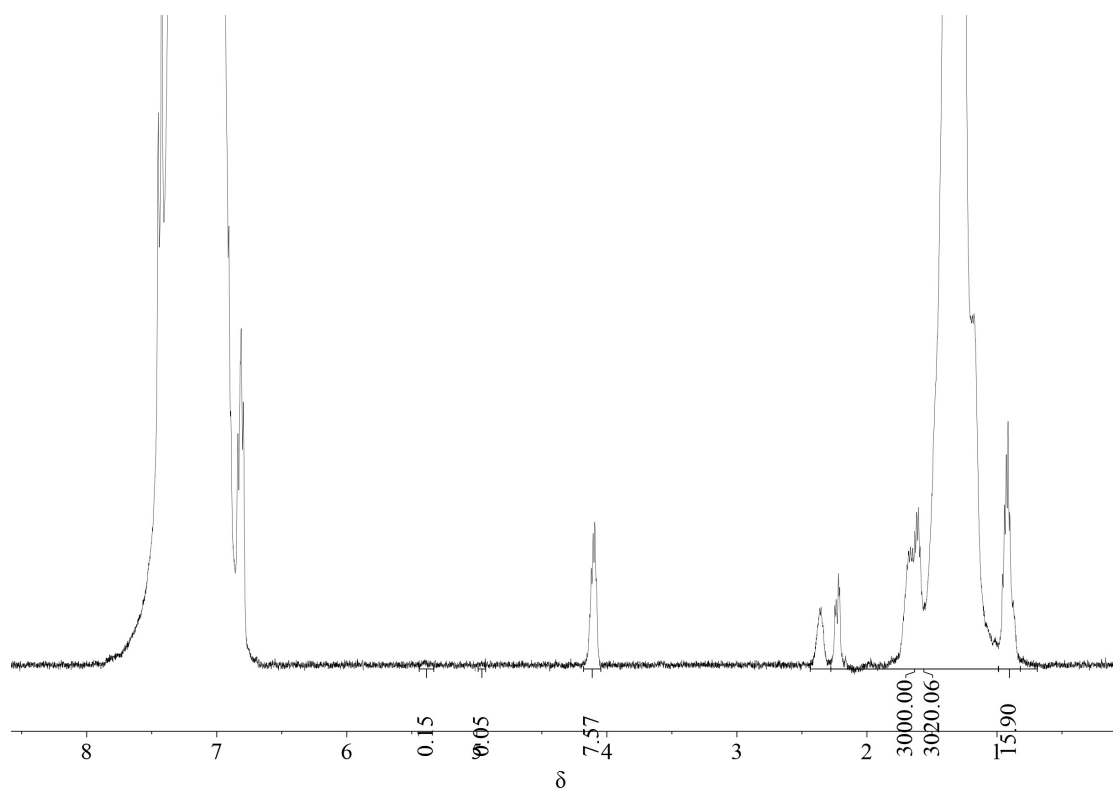

**$^1\text{H}$  NMR spectrum of polymer in Entry 1, Table 2**

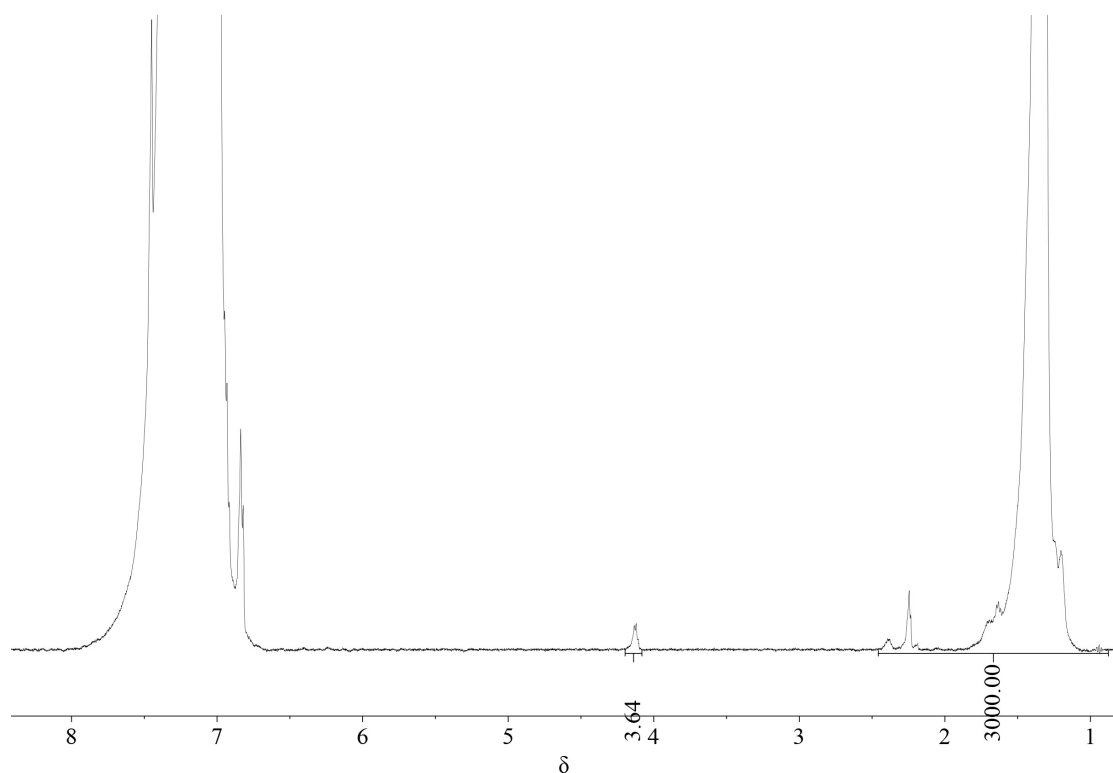

**$^1\text{H}$  NMR spectrum of polymer in Entry 2, Table 2**

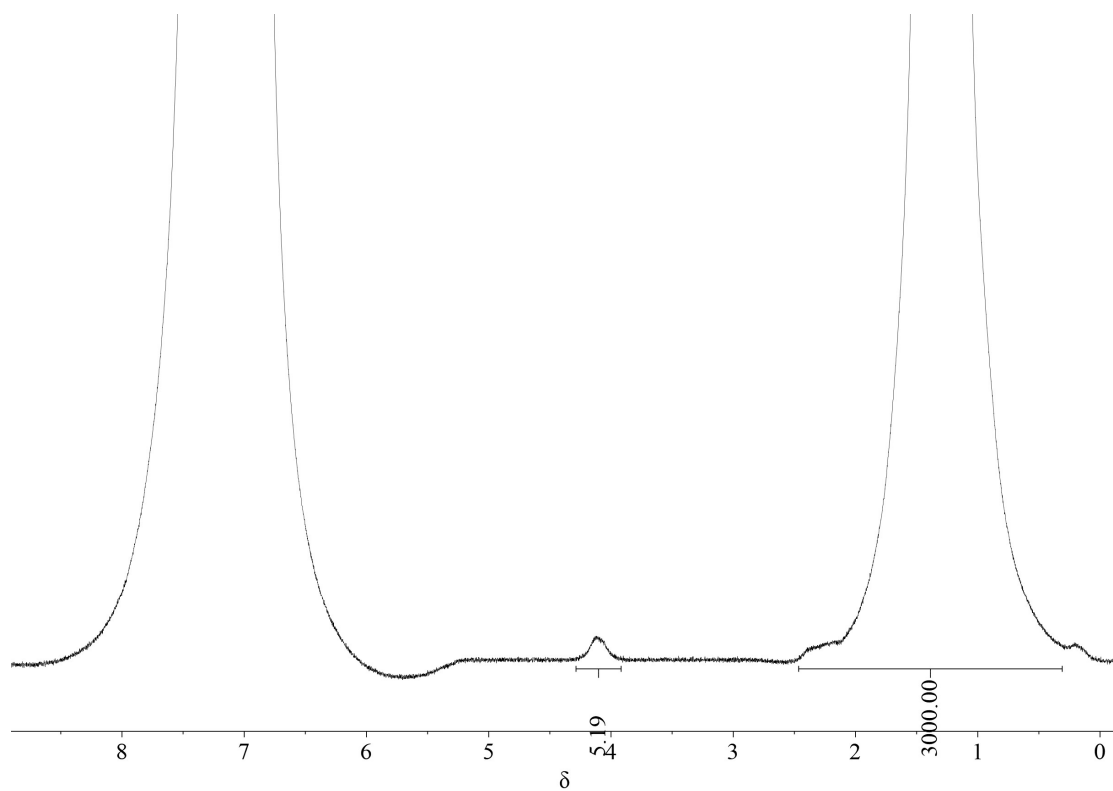

**<sup>1</sup>H NMR spectrum of polymer in Entry 3, Table 2**

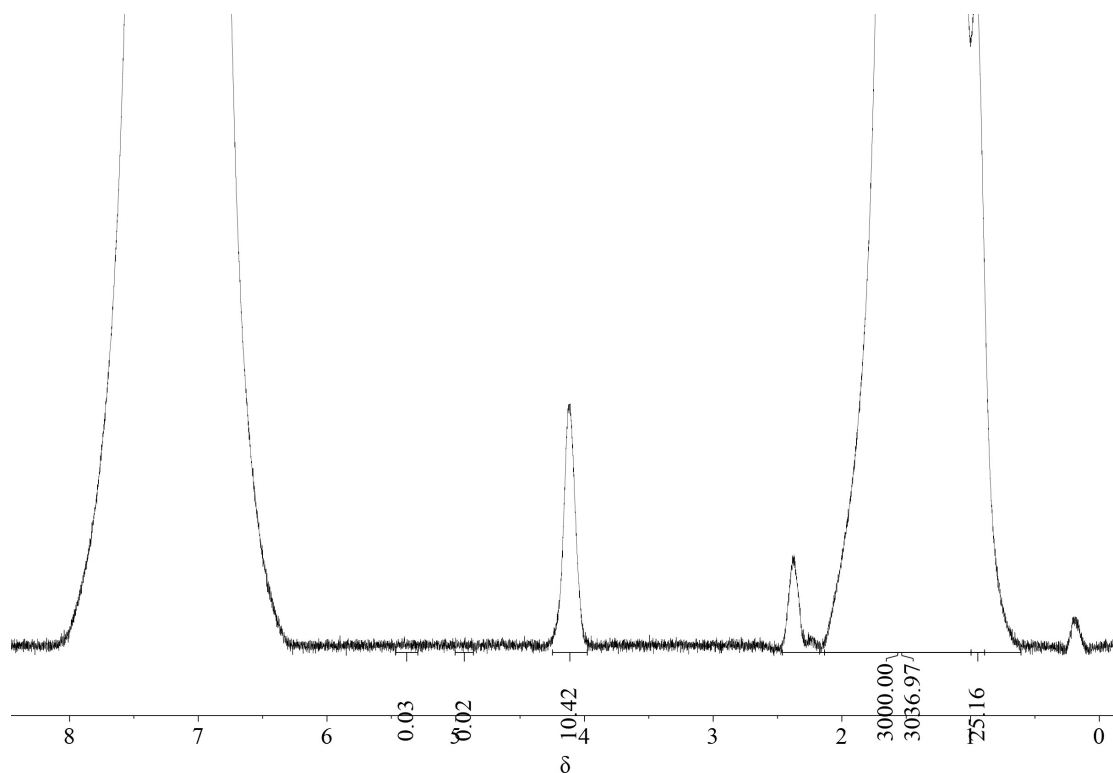

**<sup>1</sup>H NMR spectrum of polymer in Entry 4, Table 2**

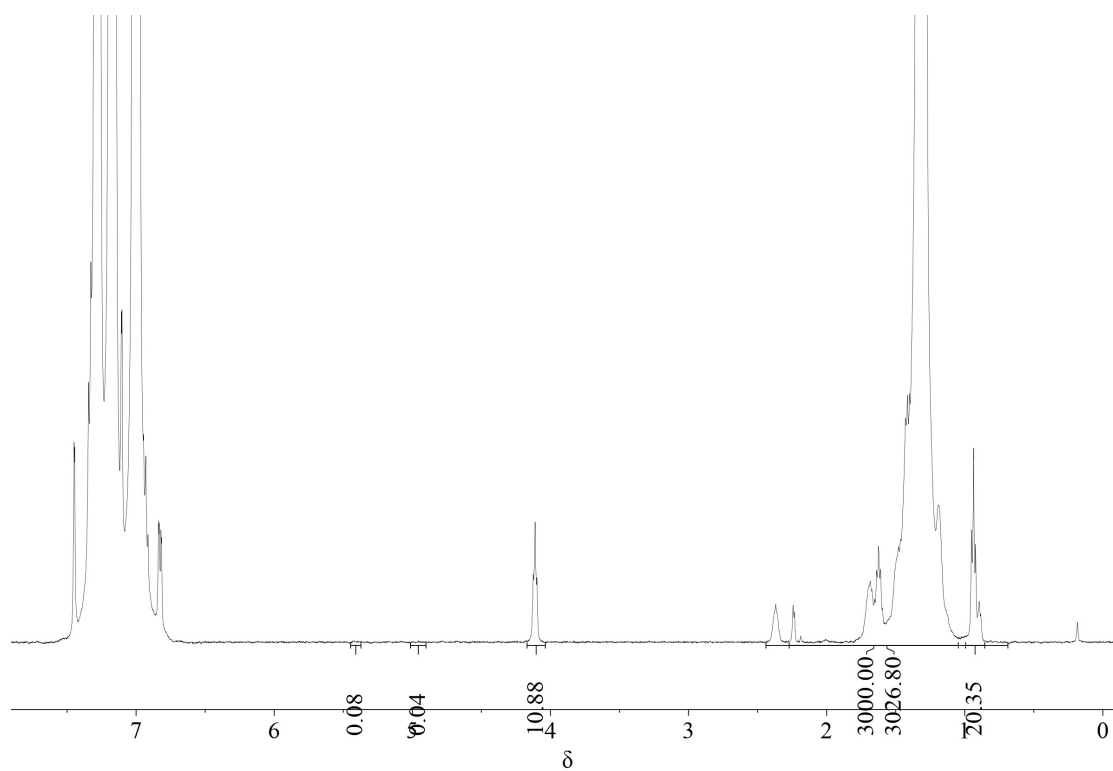

**<sup>1</sup>H NMR spectrum of polymer in Entry 5, Table 2**

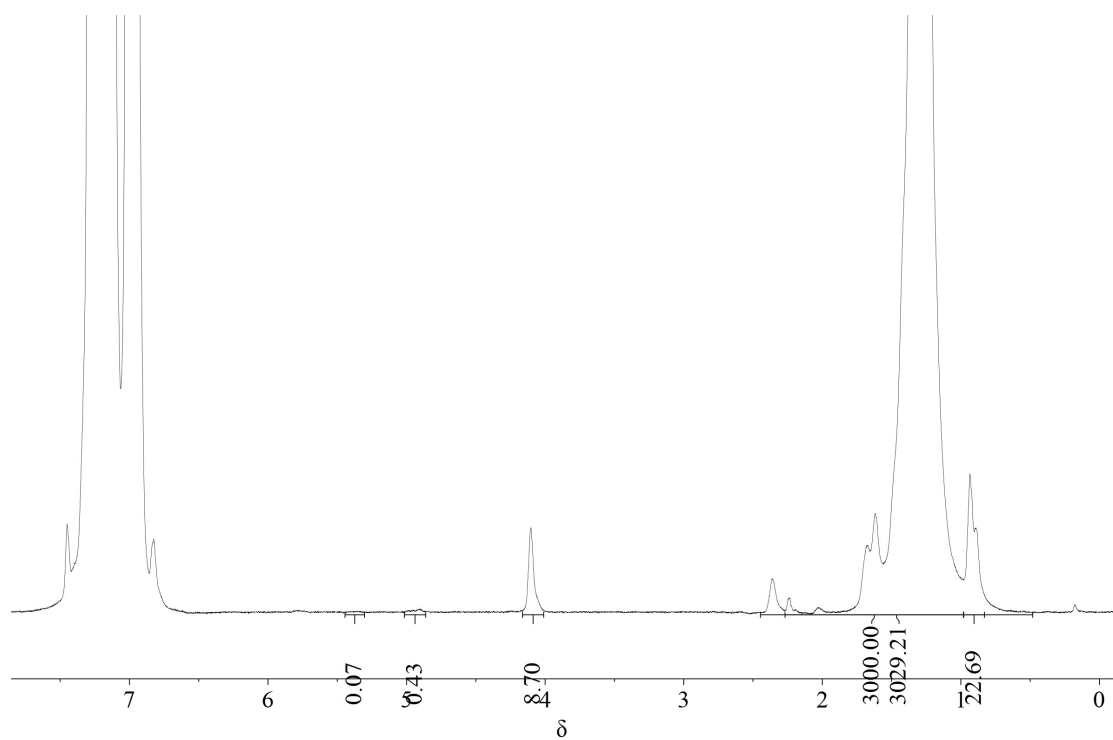

**<sup>1</sup>H NMR spectrum of polymer in Entry 6, Table 2**

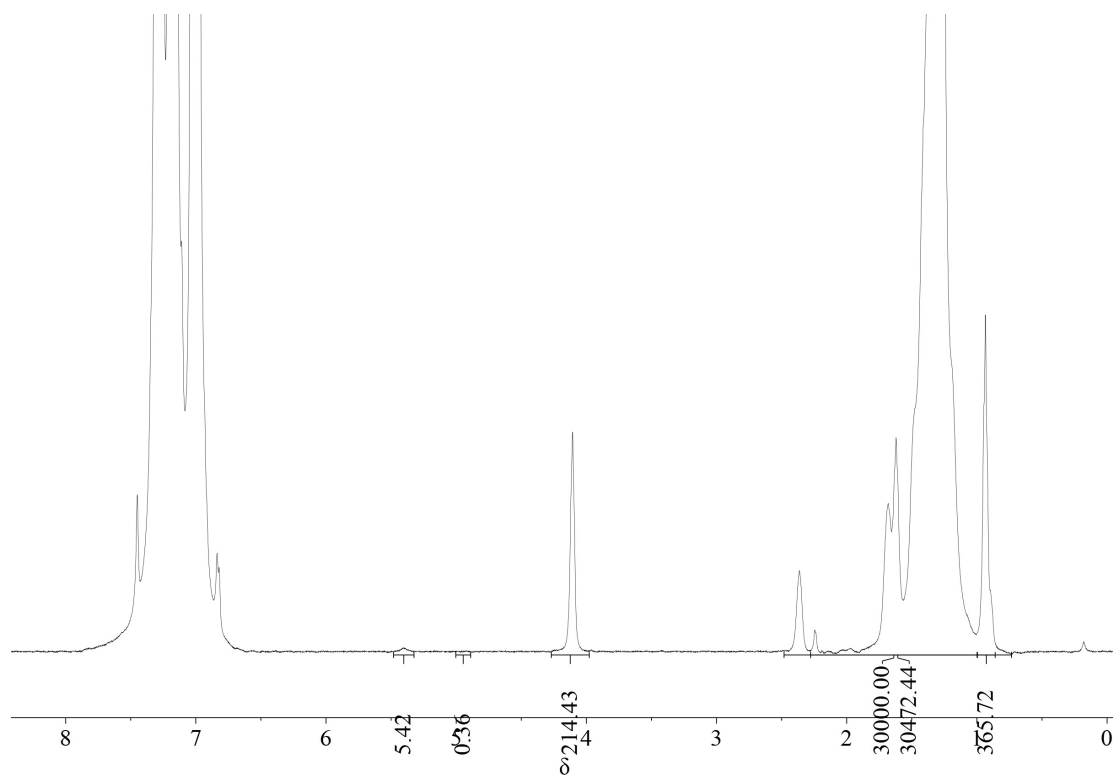

**<sup>1</sup>H NMR spectrum of polymer in Entry 7, Table 2**

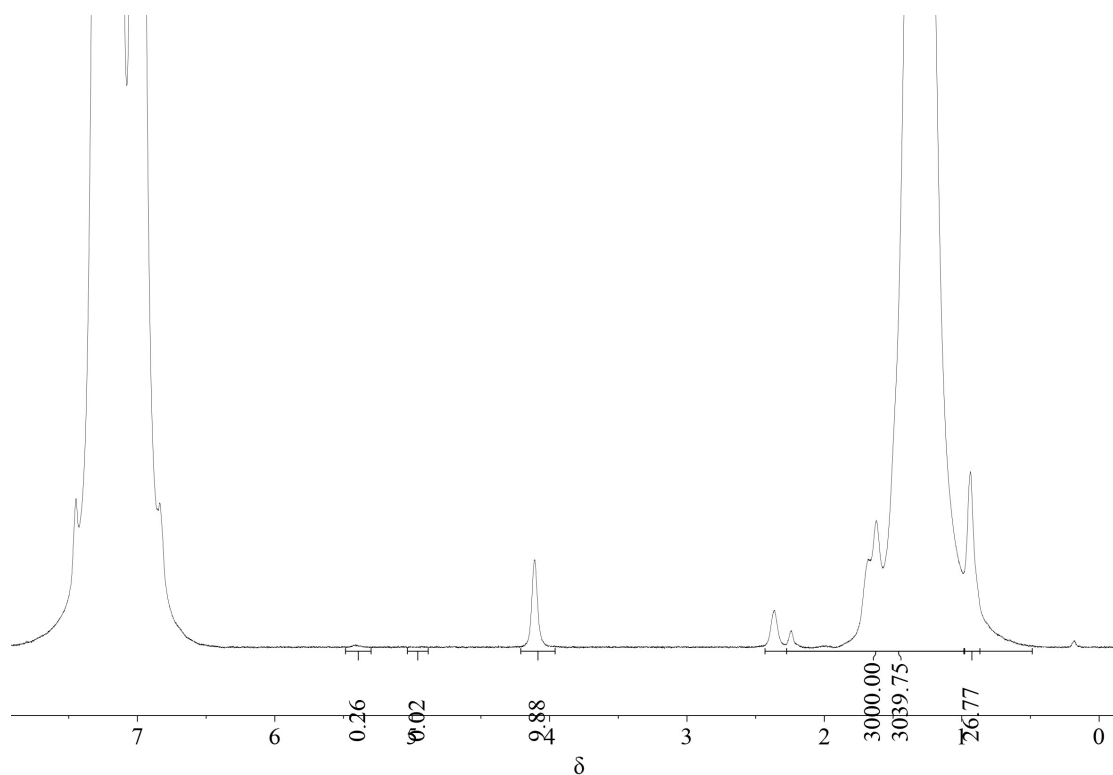

**<sup>1</sup>H NMR spectrum of polymer in Entry 8, Table 2**

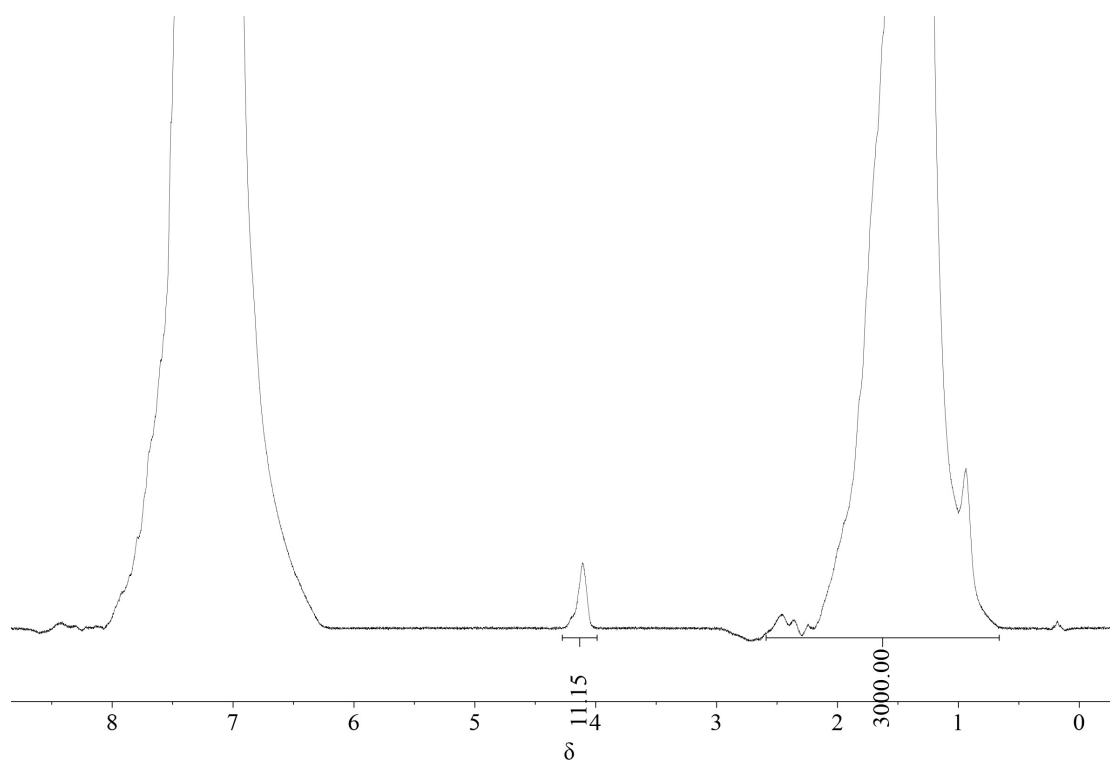

**$^1\text{H}$  NMR spectrum of polymer in Entry 10, Table 2**

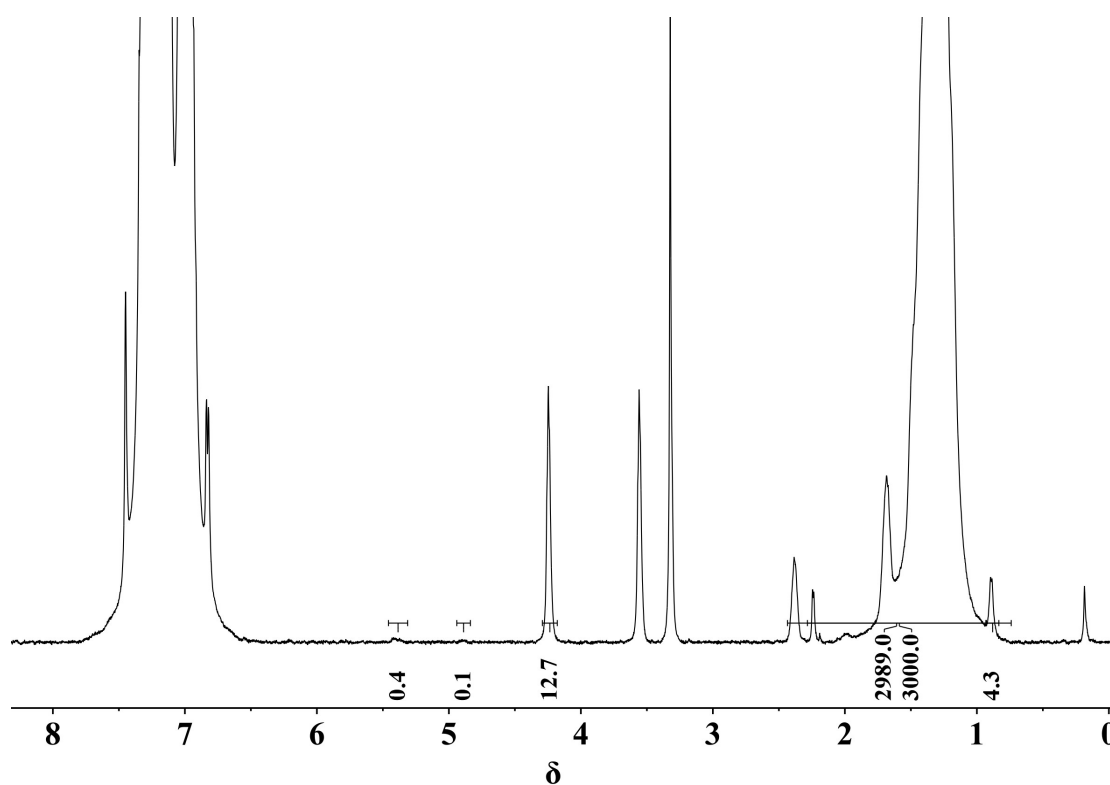

**$^1\text{H}$  NMR spectrum of polymer in Entry 11, Table 2**

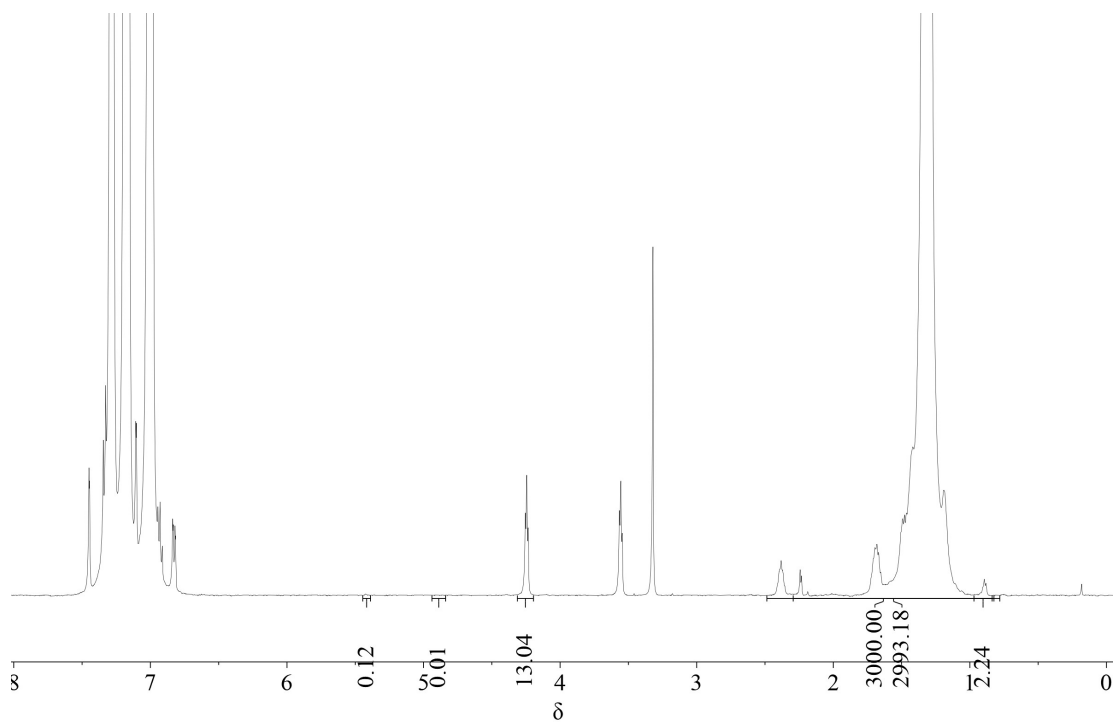

**1H NMR spectrum of polymer in Entry 12, Table 2**

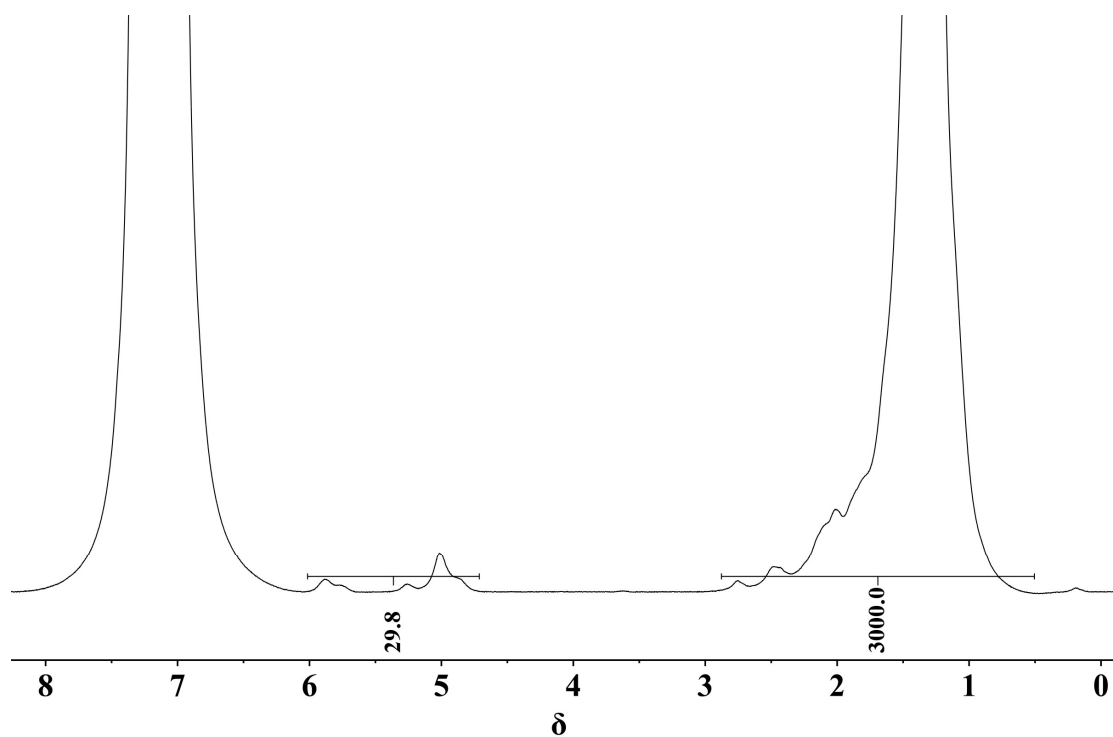

**1H NMR spectrum of polymer in Entry 13, Table 2**



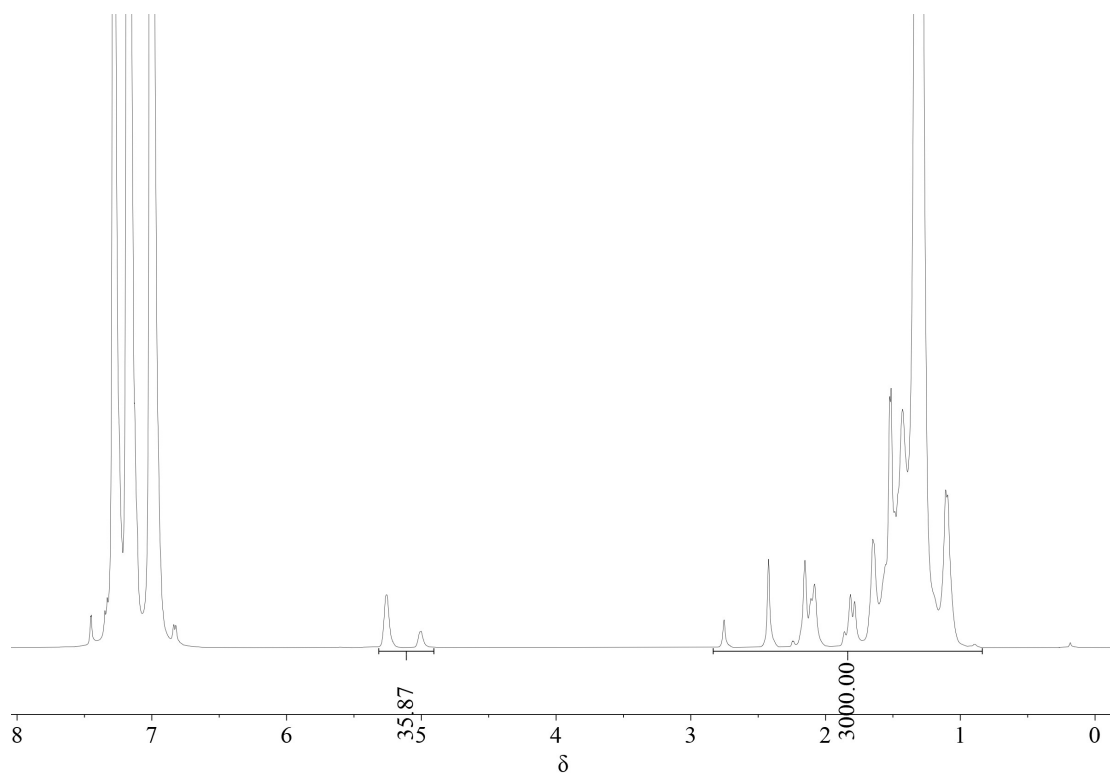

**$^1\text{H}$  NMR spectrum of polymer in Entry 14, Table 2**

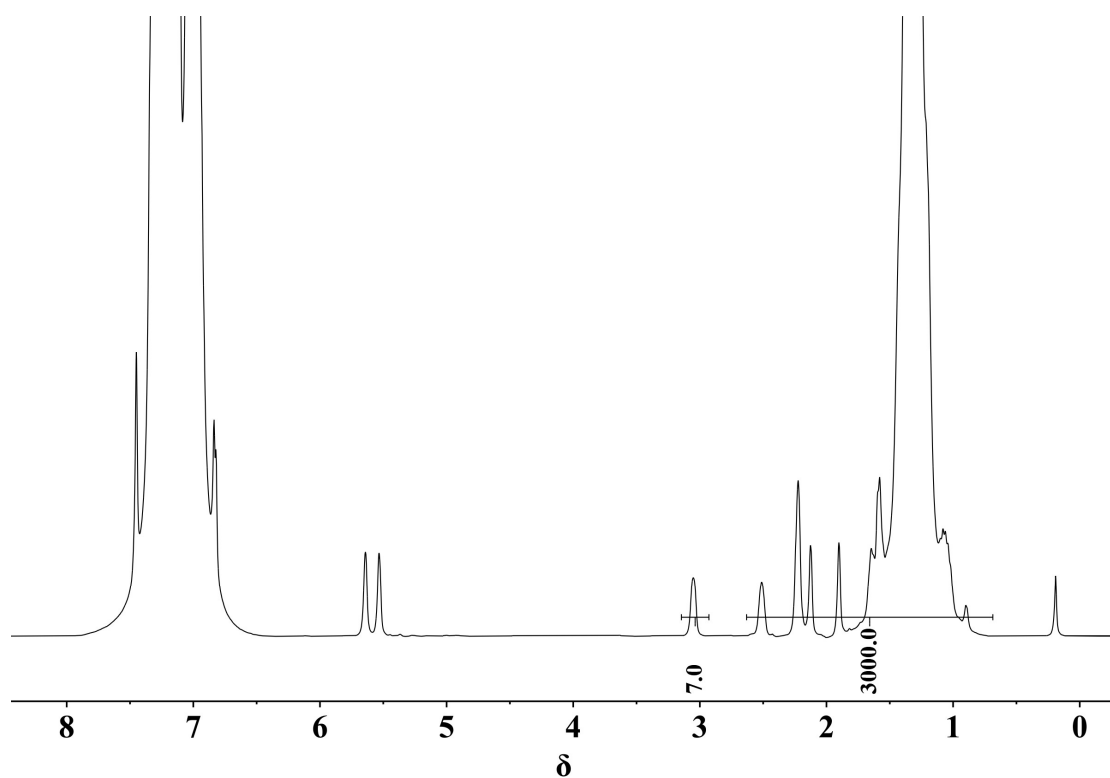

**$^1\text{H}$  NMR spectrum of polymer in Entry 15, Table 2**

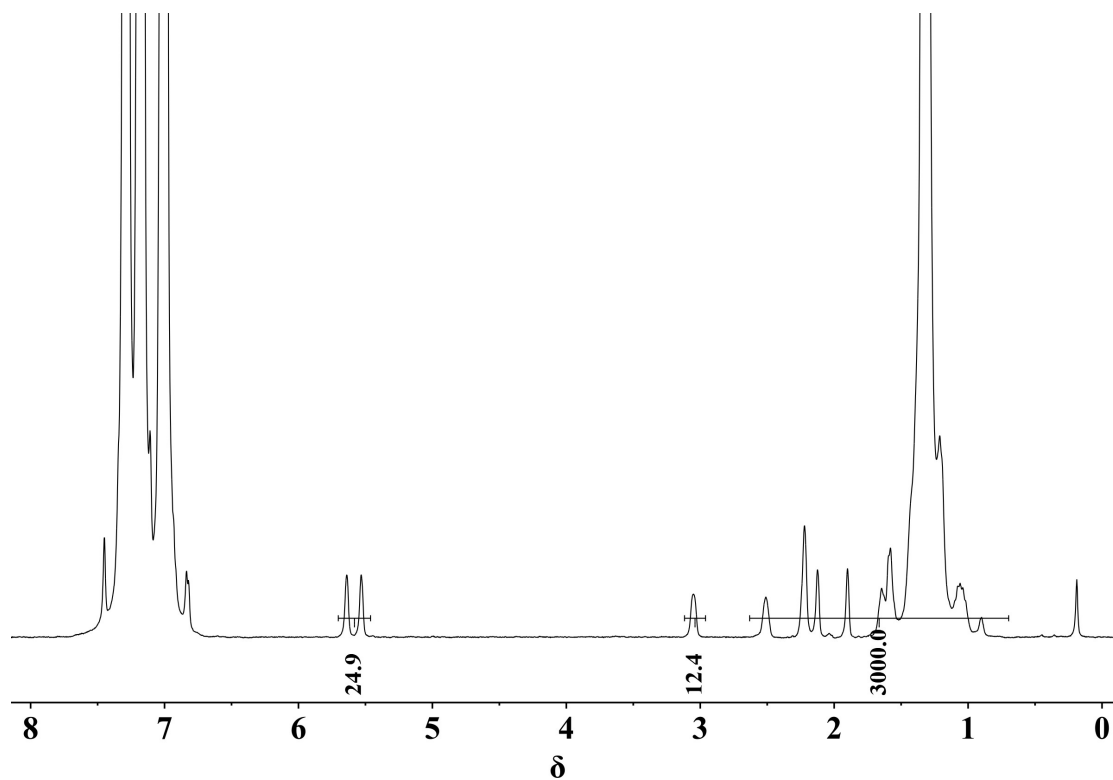

**<sup>1</sup>H NMR spectrum of polymer in Entry 16, Table 2**

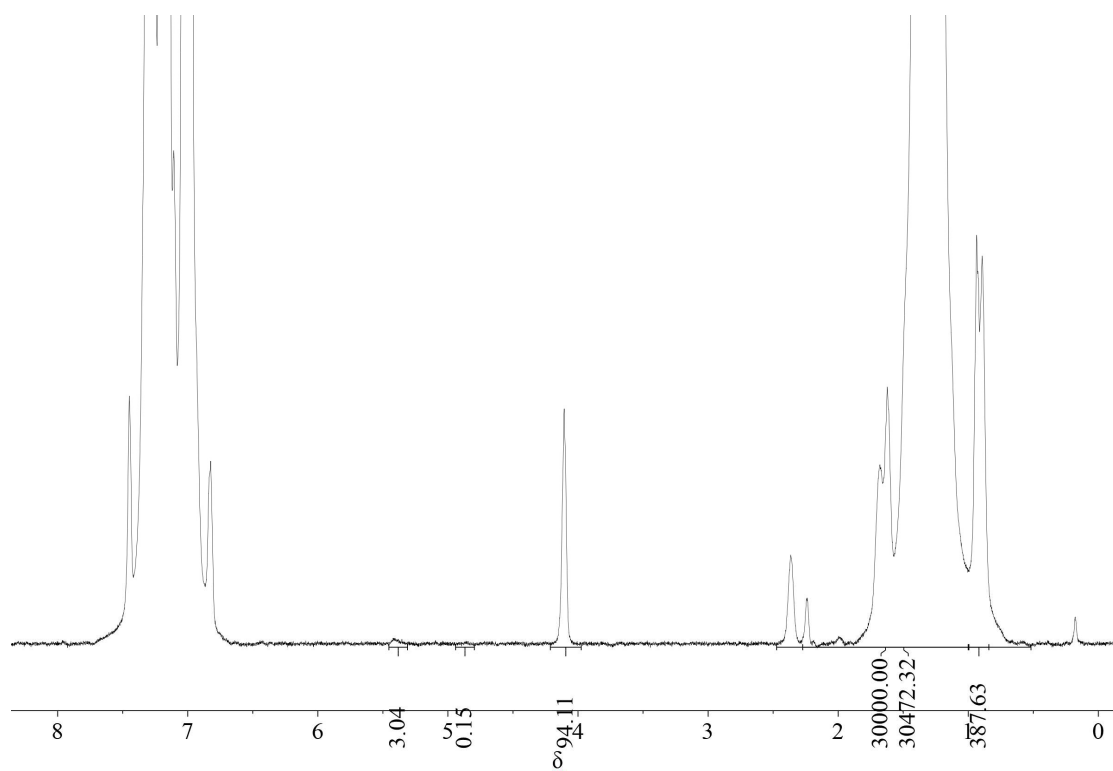

**<sup>1</sup>H NMR spectrum of polymer in Entry 17, Table 2**

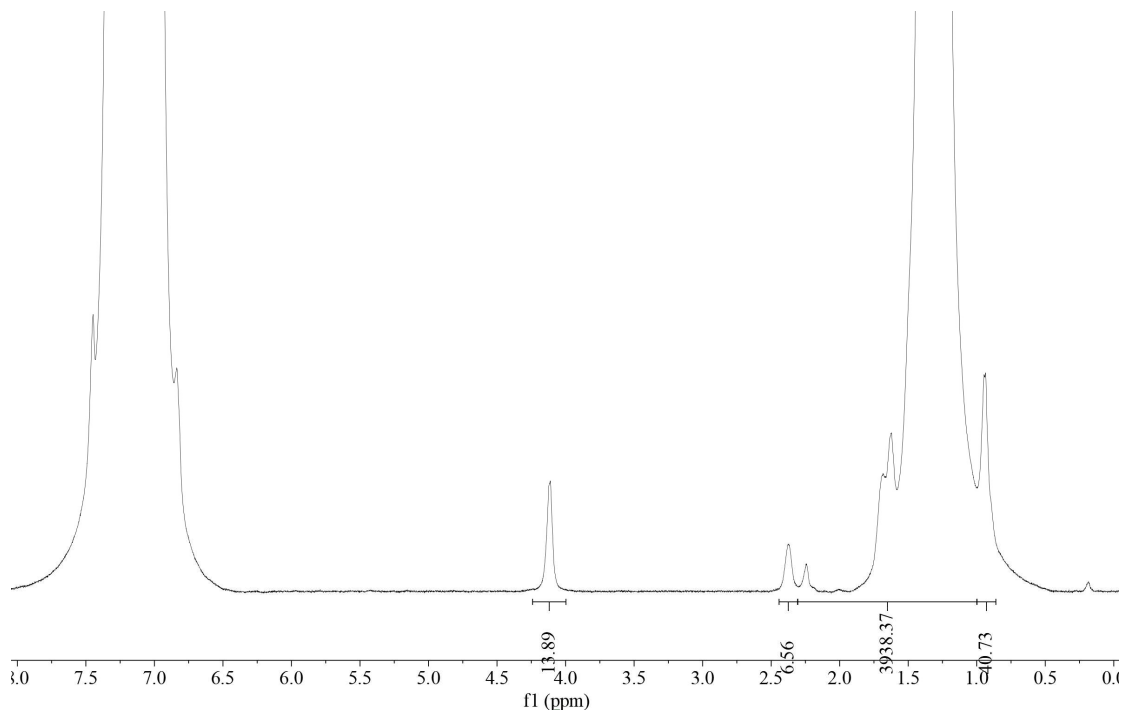

**1H NMR spectrum of polymer in Entry 18, Table 2**

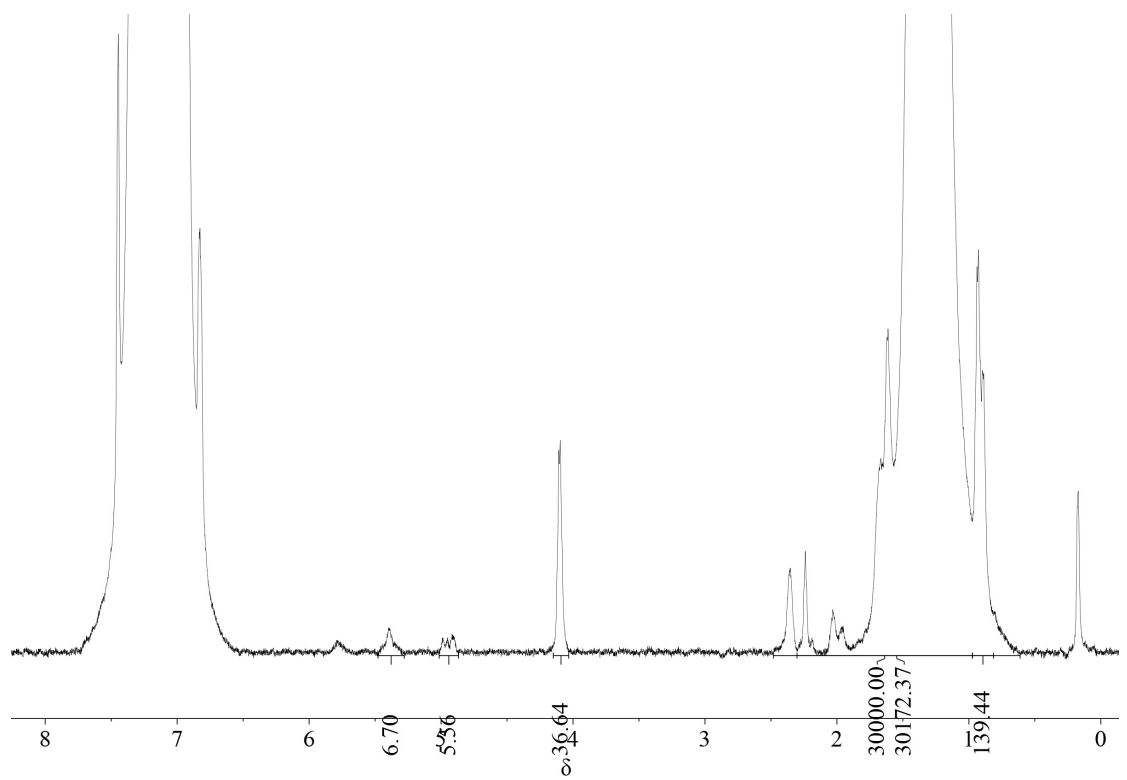

**1H NMR spectrum of polymer in Entry 19, Table 2**

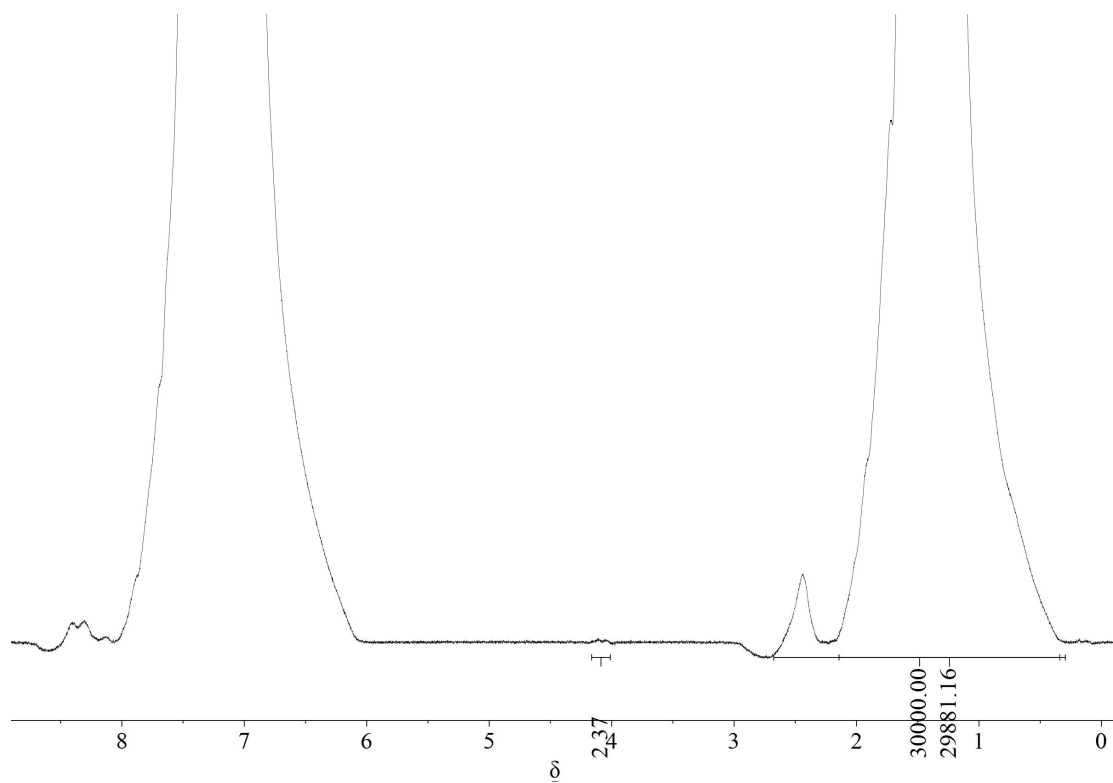

**<sup>1</sup>H NMR spectrum of polymer in Entry 20, Table 2**

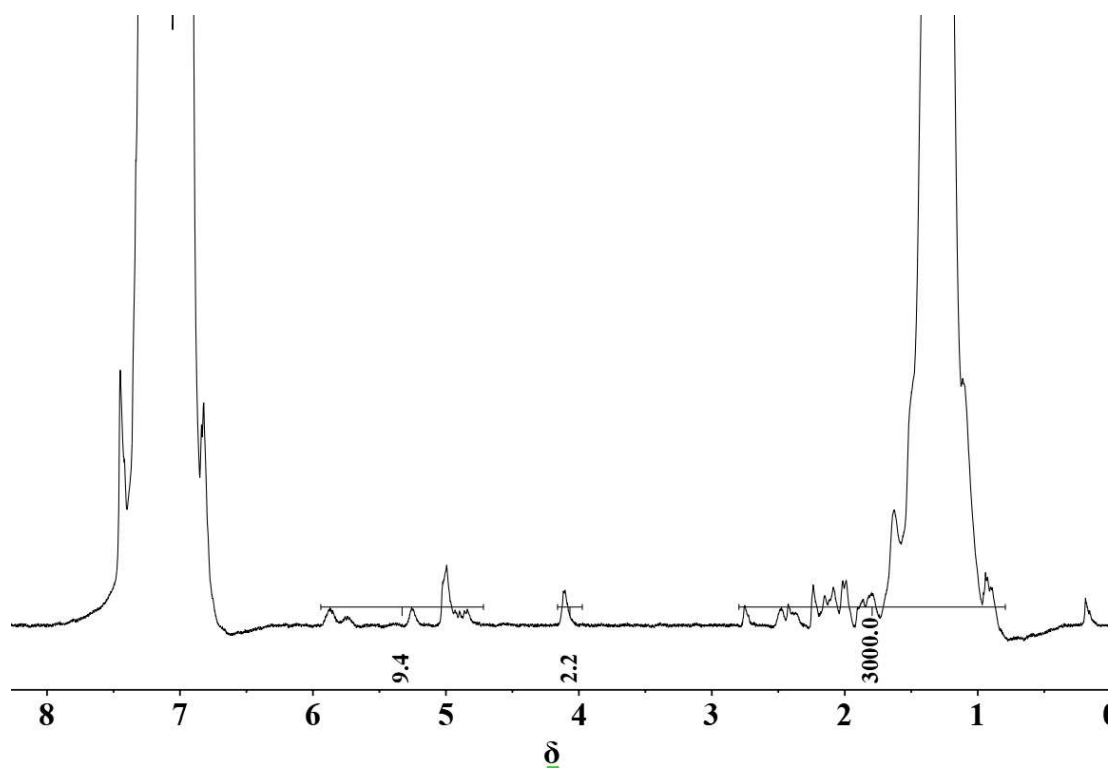

**<sup>1</sup>H NMR spectrum of polymer in Entry 1, Table 3**

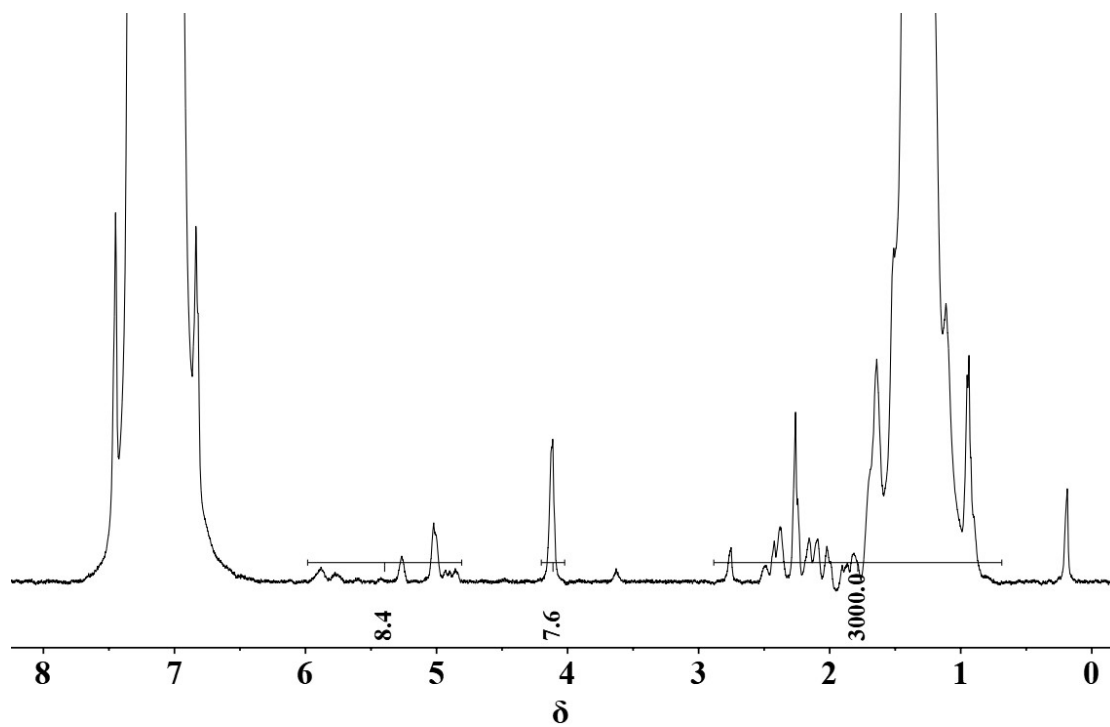

**<sup>1</sup>H NMR spectrum of polymer in Entry 2, Table3**

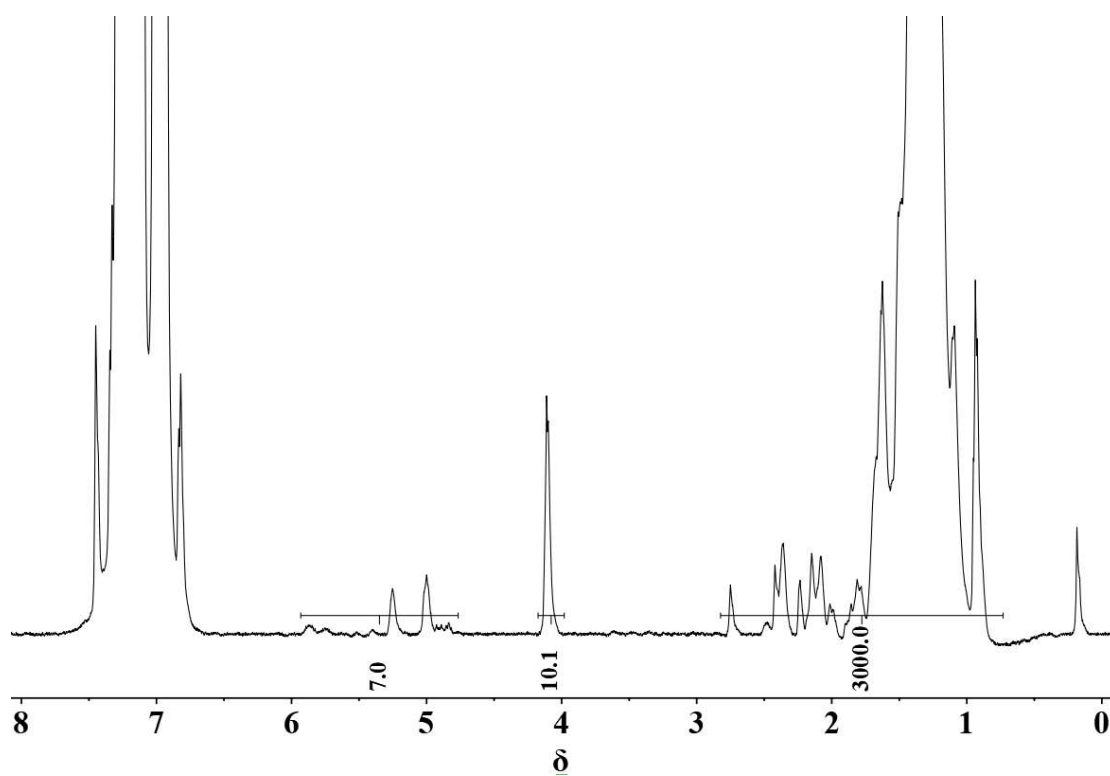

**<sup>1</sup>H NMR spectrum of polymer in Entry 3, Table3**

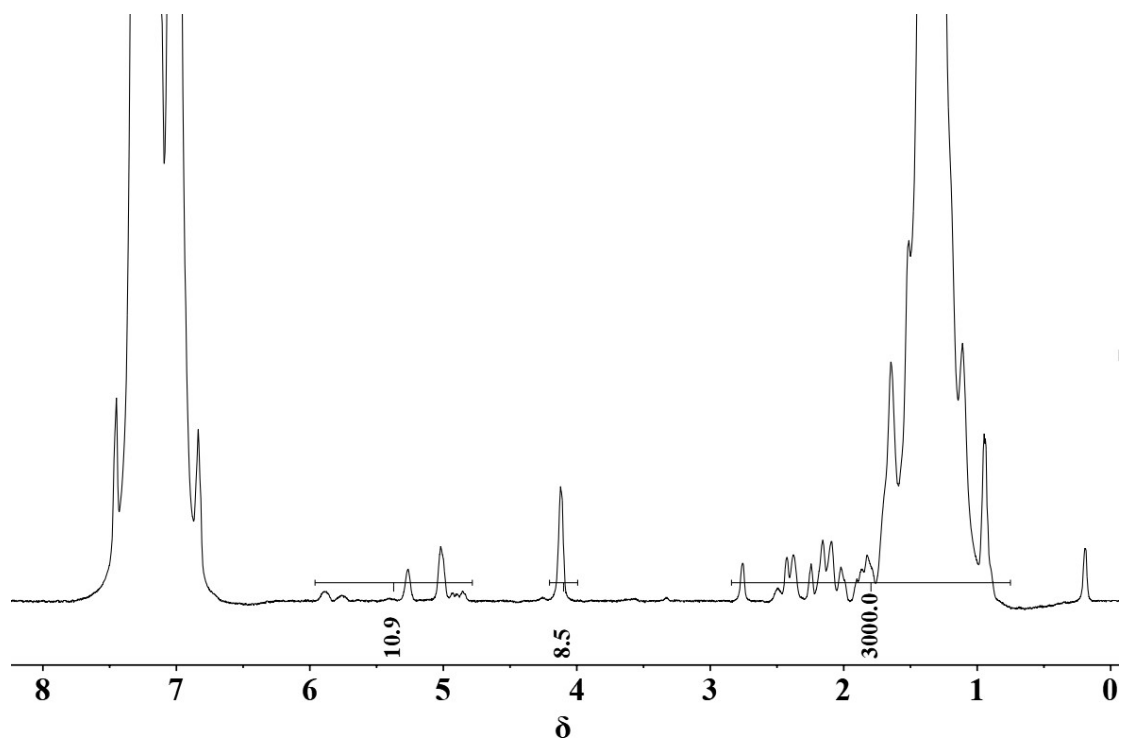

**<sup>1</sup>H NMR spectrum of polymer in Entry 4, Table3**

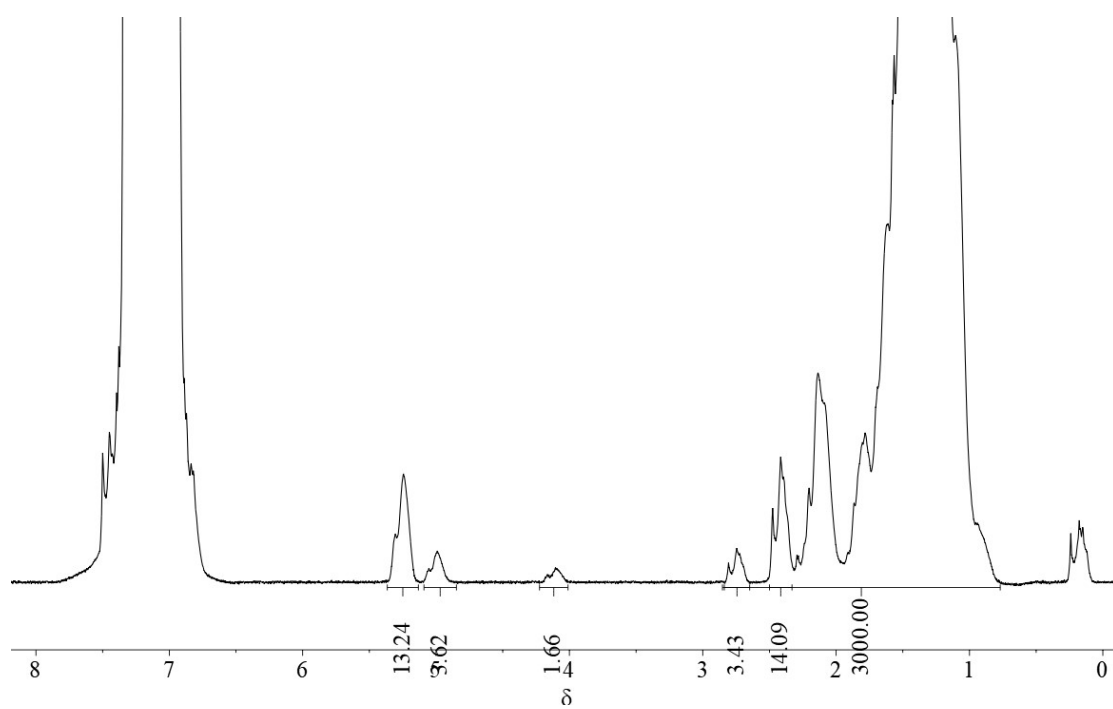

**<sup>1</sup>H NMR spectrum of polymer in Entry 5, Table3**

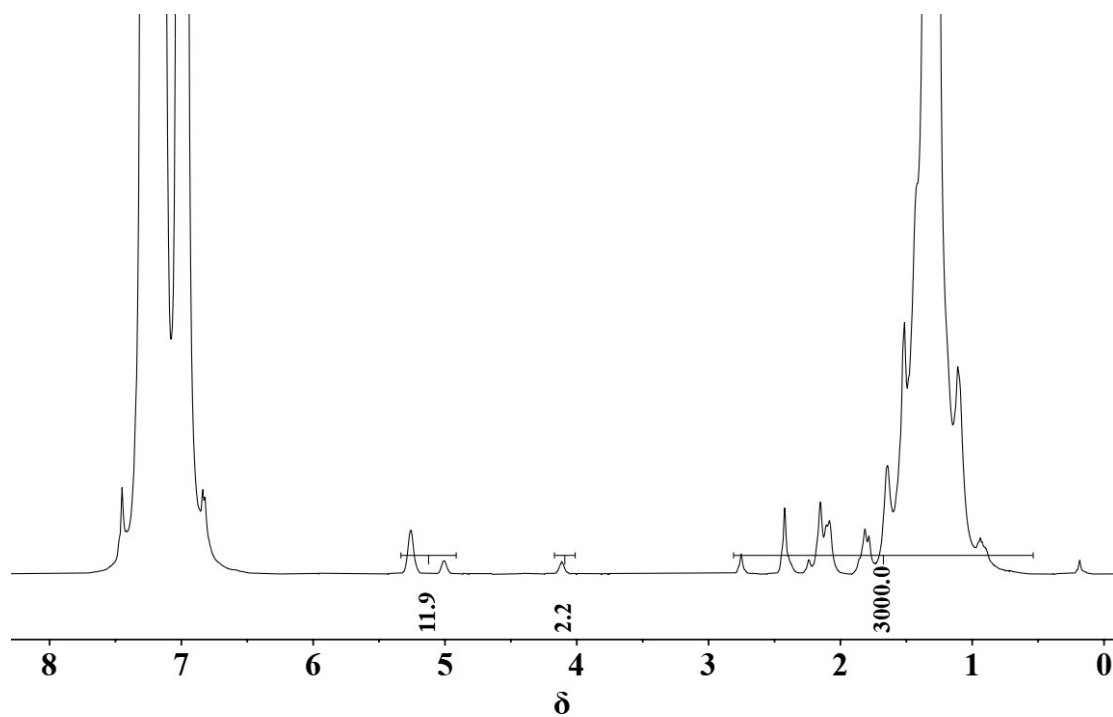

$^1\text{H}$  NMR spectrum of polymer in Entry 6, Table3

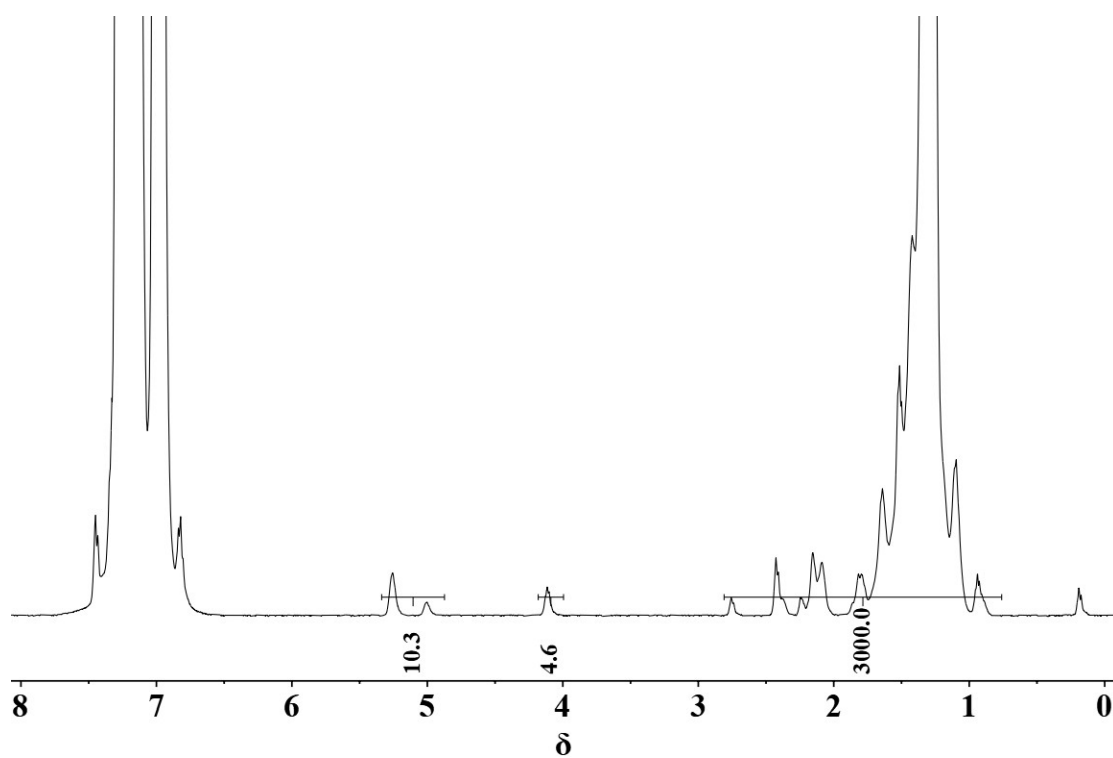

$^1\text{H}$  NMR spectrum of polymer in Entry 7, Table3

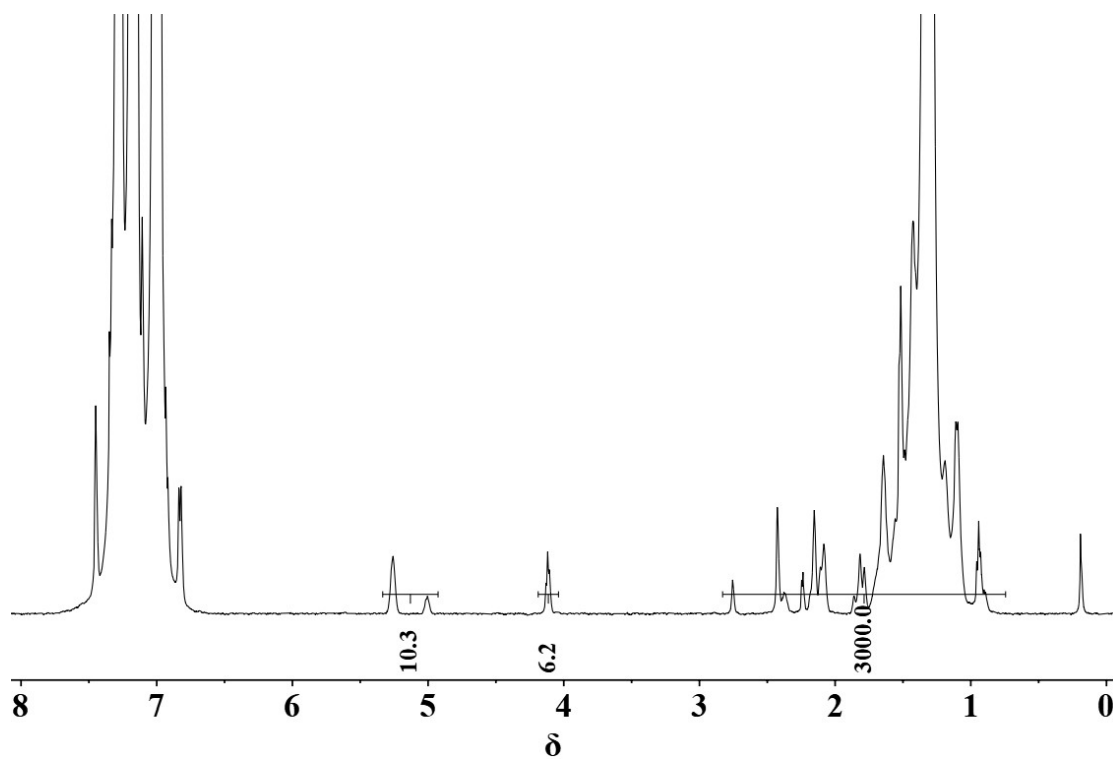

**<sup>1</sup>H NMR spectrum of polymer in Entry 8, Table3**

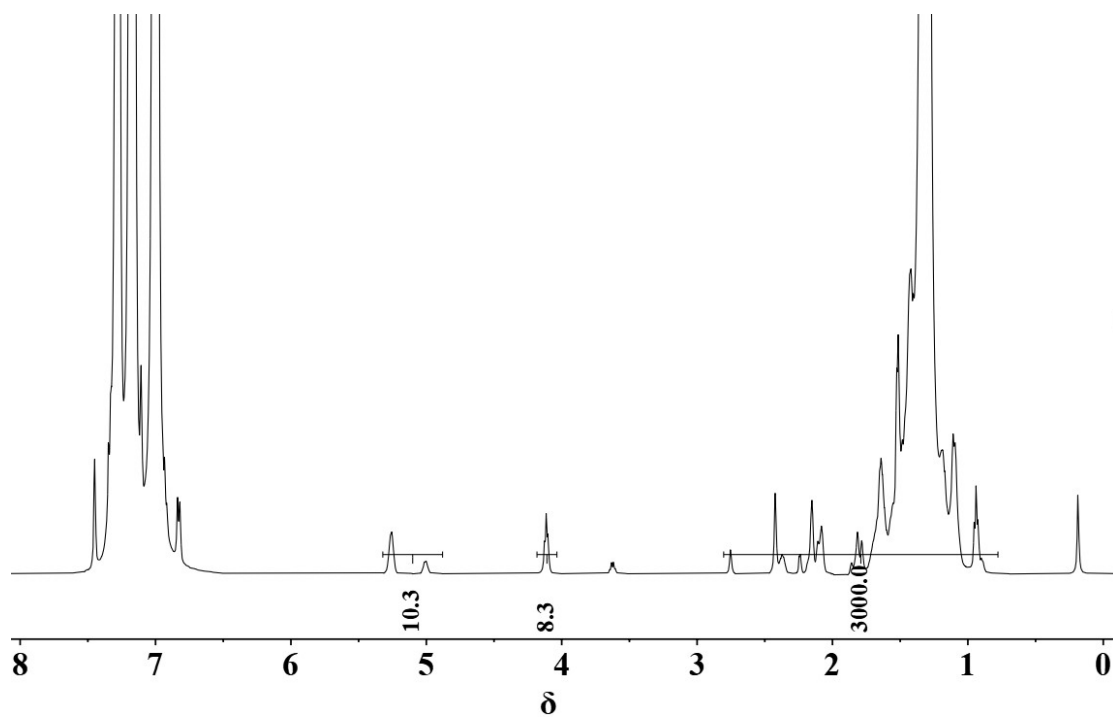

**<sup>1</sup>H NMR spectrum of polymer in Entry 9, Table3**



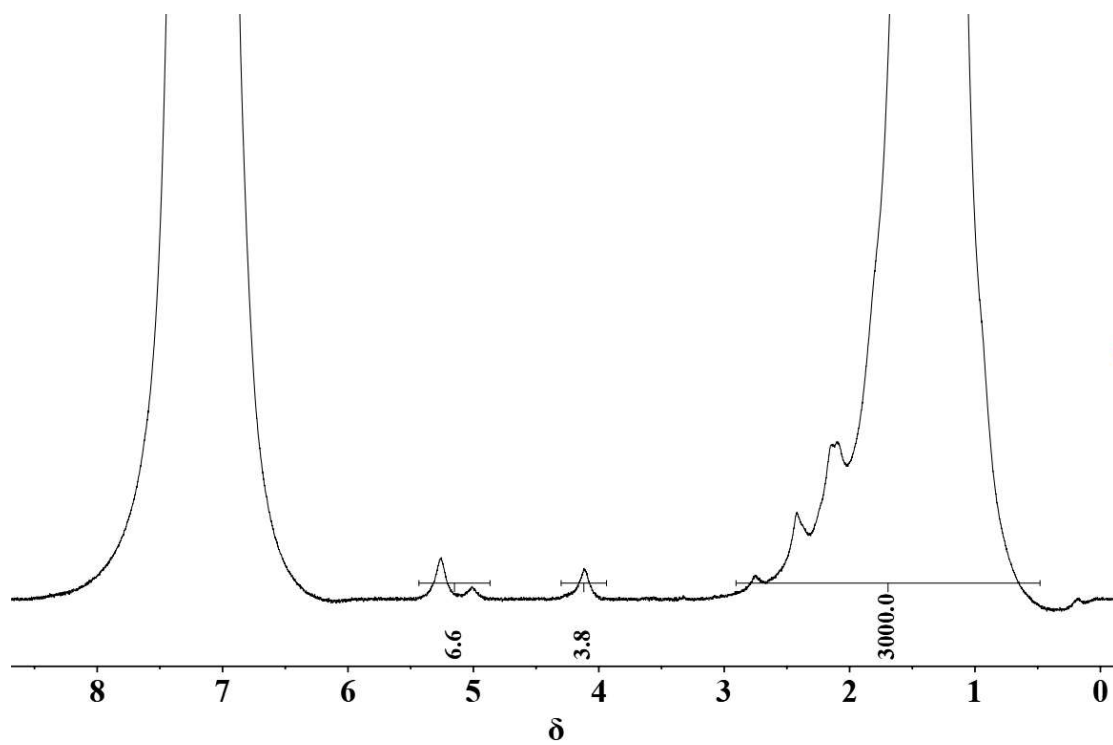

$^1\text{H}$  NMR spectrum of polymer in Entry 10, Table 3

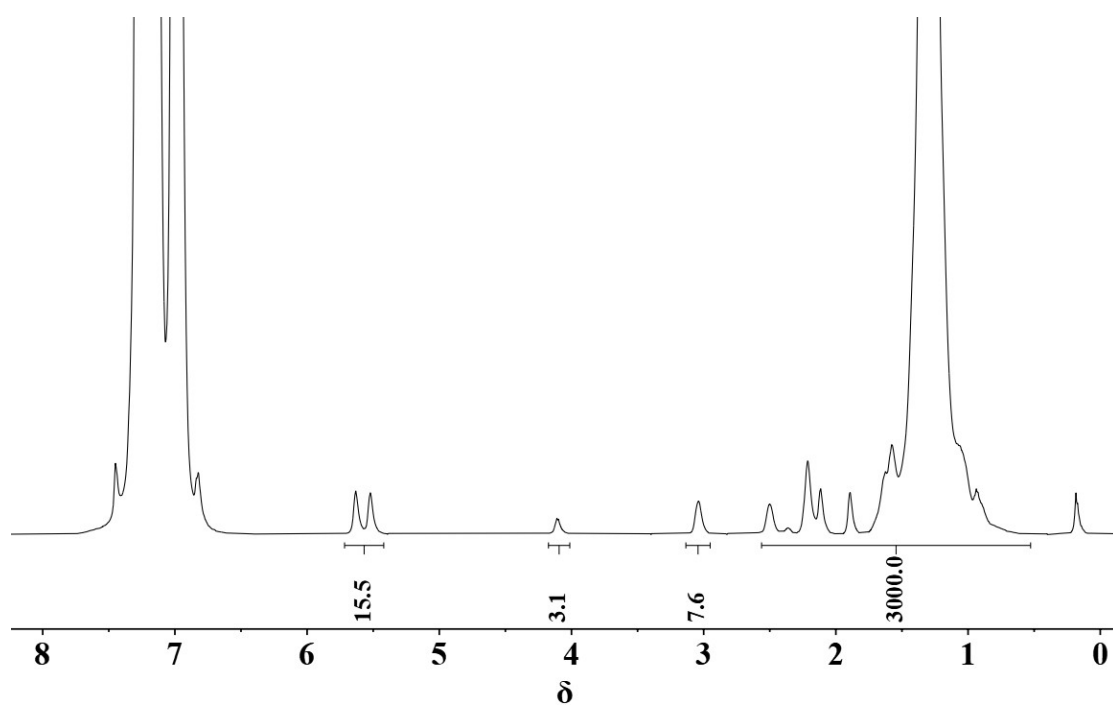

$^1\text{H}$  NMR spectrum of polymer in Entry 11, Table 3

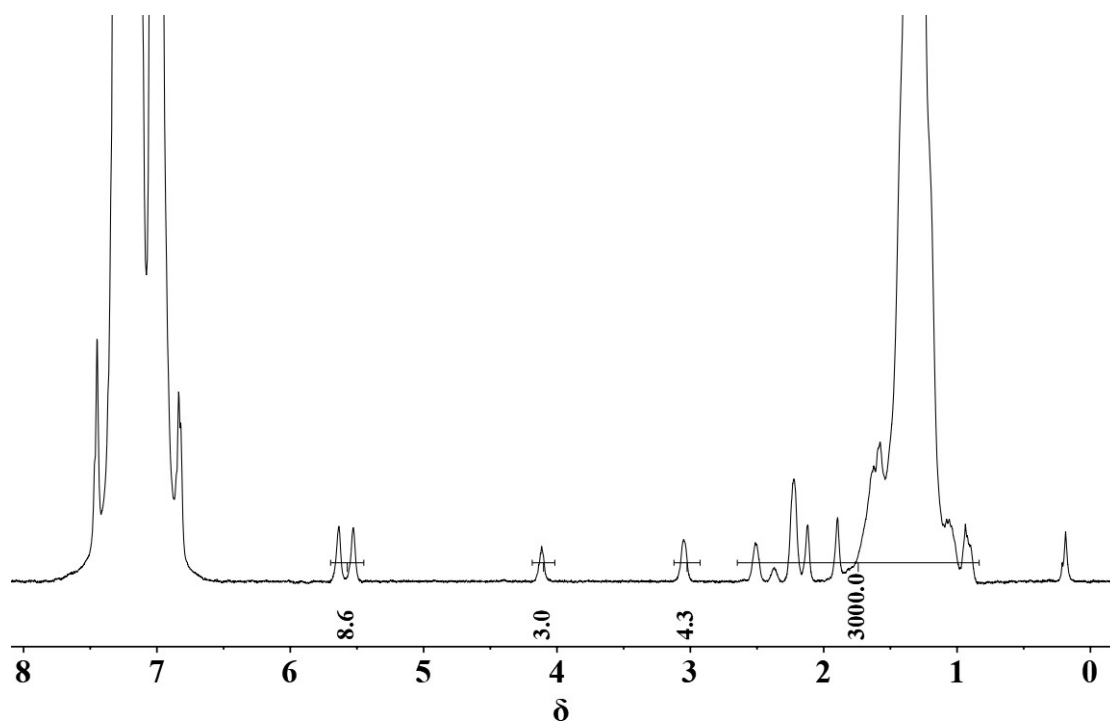

**<sup>1</sup>H NMR spectrum of polymer in Entry 12, Table3**

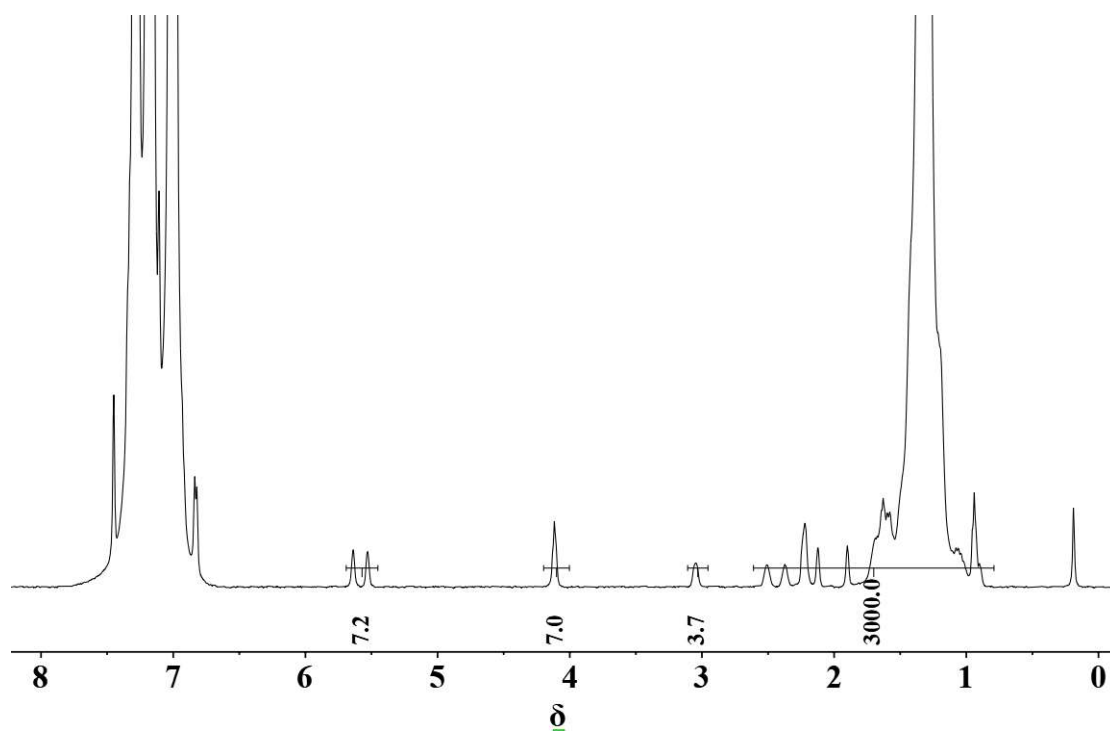

**<sup>1</sup>H NMR spectrum of polymer in Entry 13, Table3**

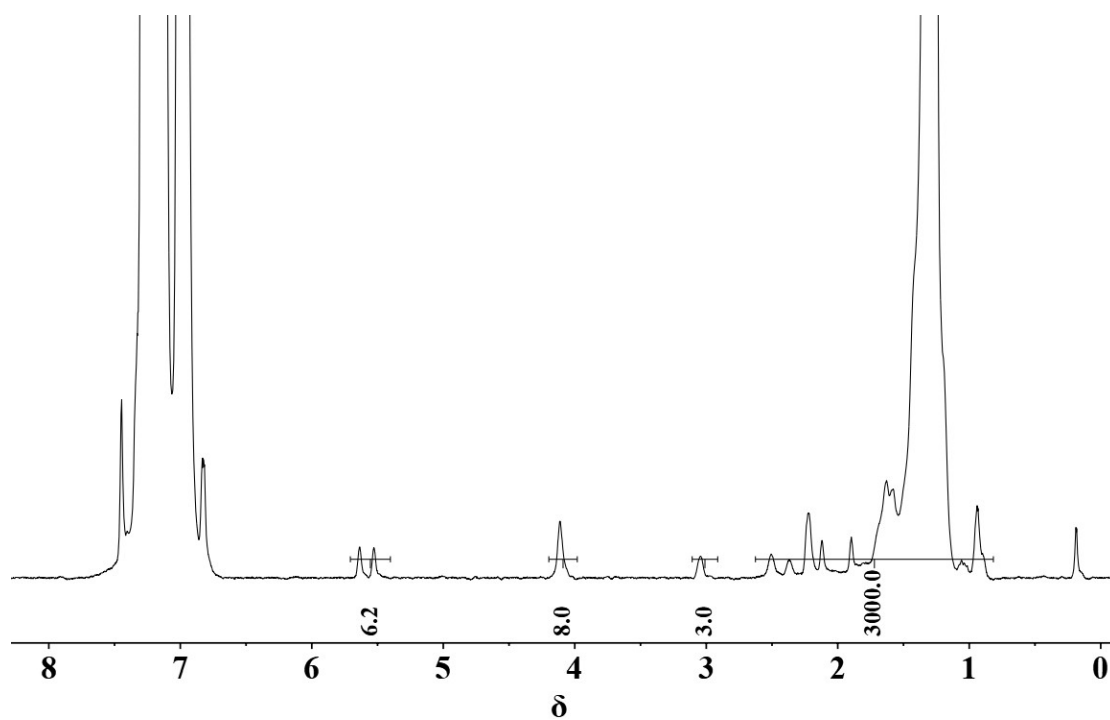

**$^1\text{H}$  NMR spectrum of polymer in Entry 14, Table 3**

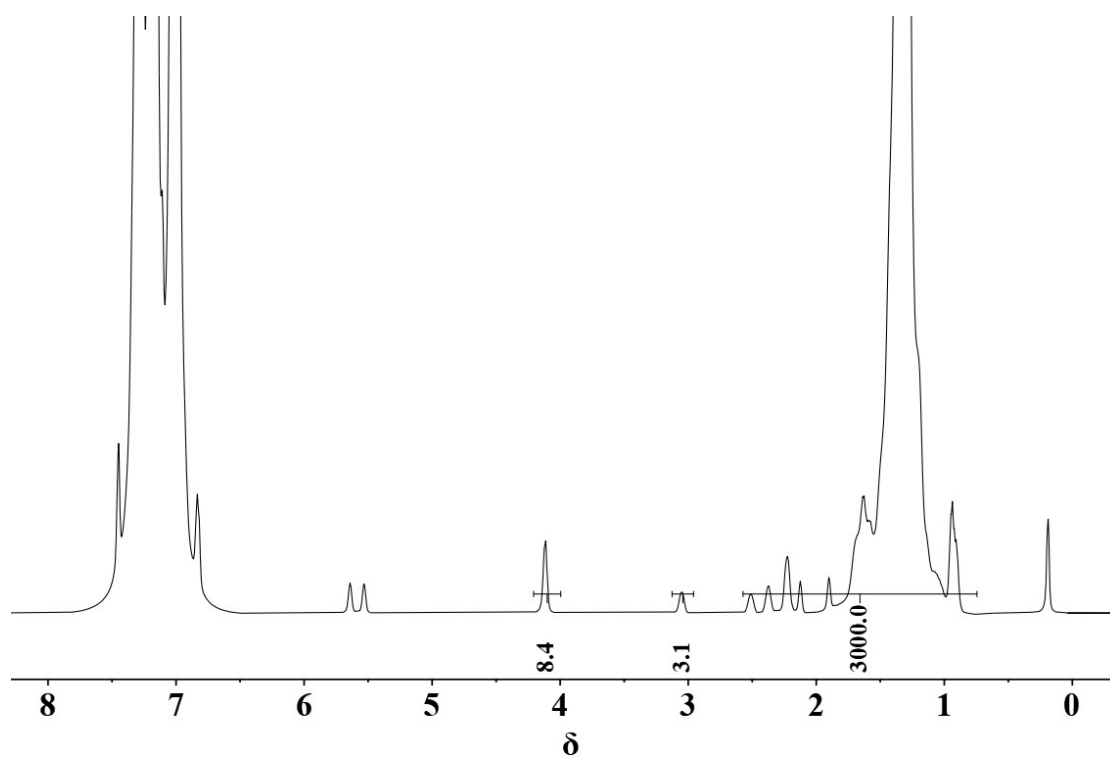

**$^1\text{H}$  NMR spectrum of polymer in Entry 15, Table 3**

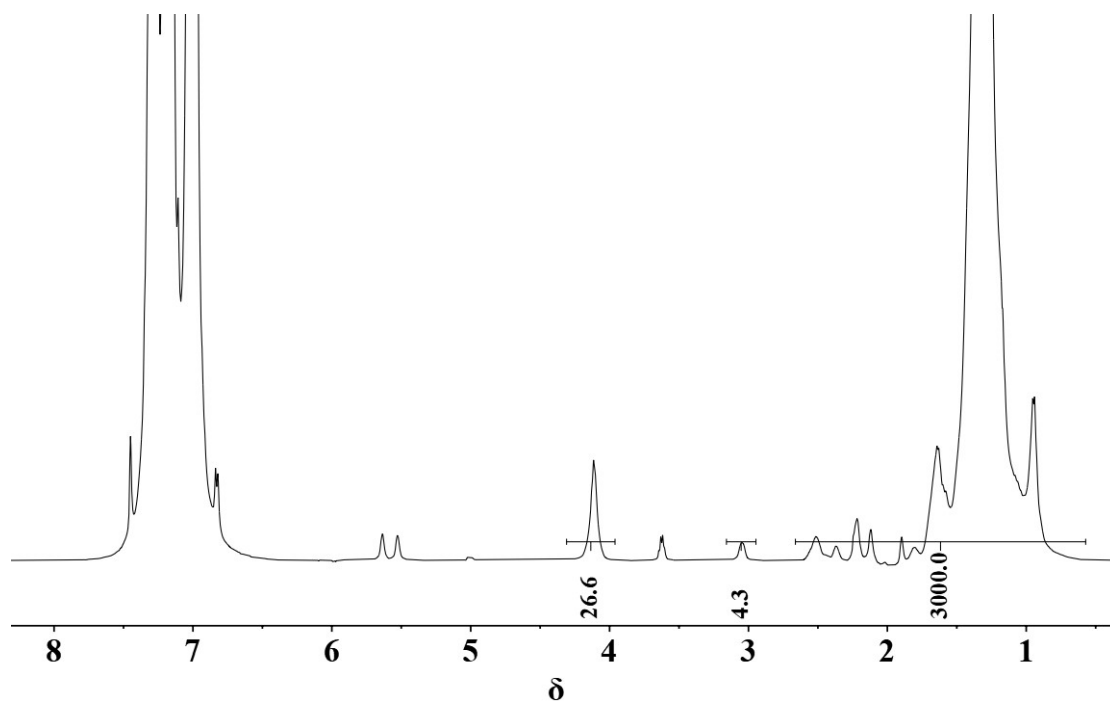

$^1\text{H}$  NMR spectrum of polymer in Entry 16, Table 3

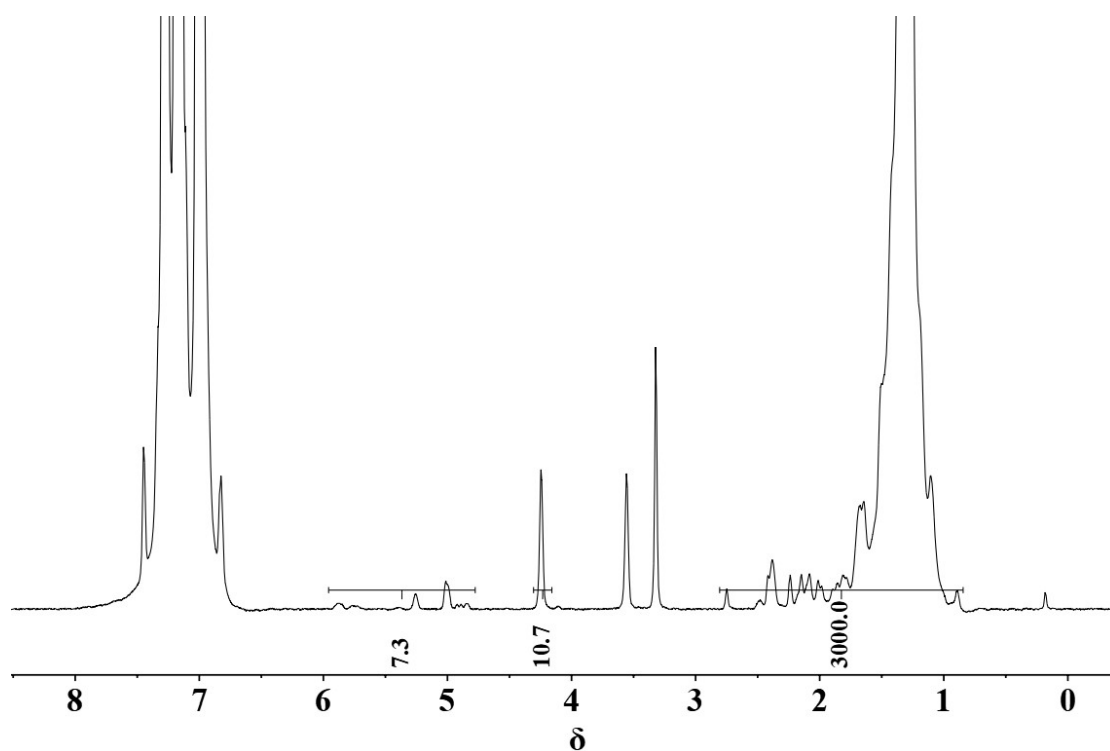

$^1\text{H}$  NMR spectrum of polymer in Entry 18, Table 3

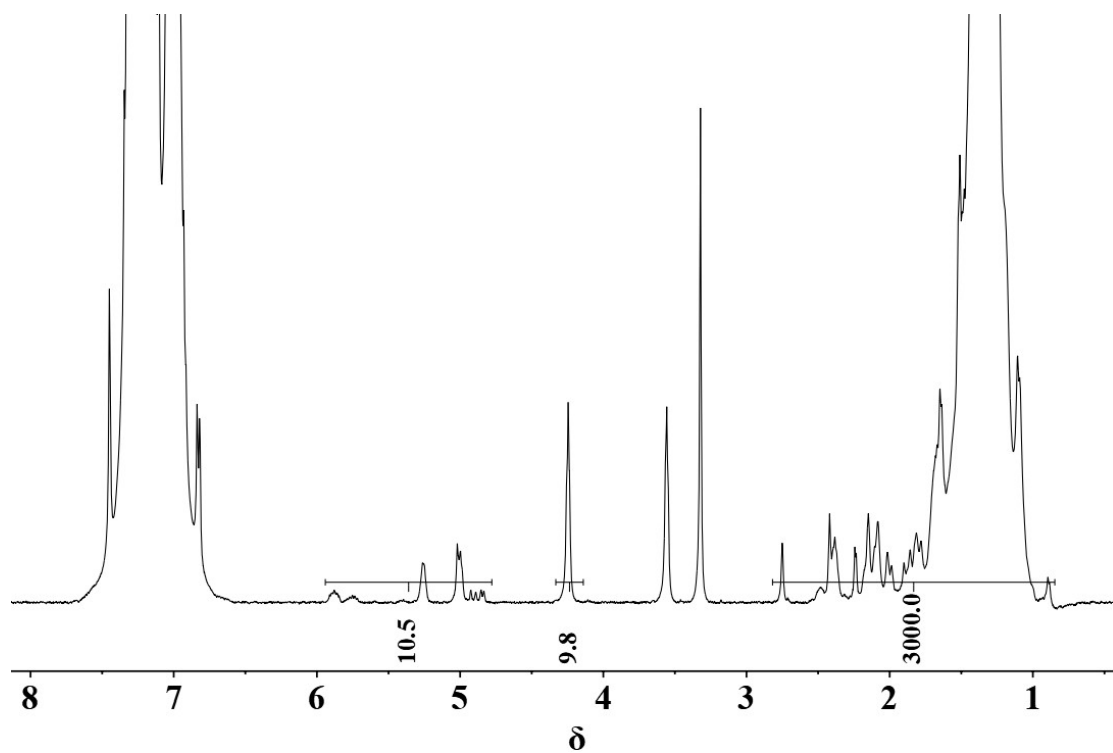

**$^1\text{H}$  NMR spectrum of polymer in Entry 19, Table3**

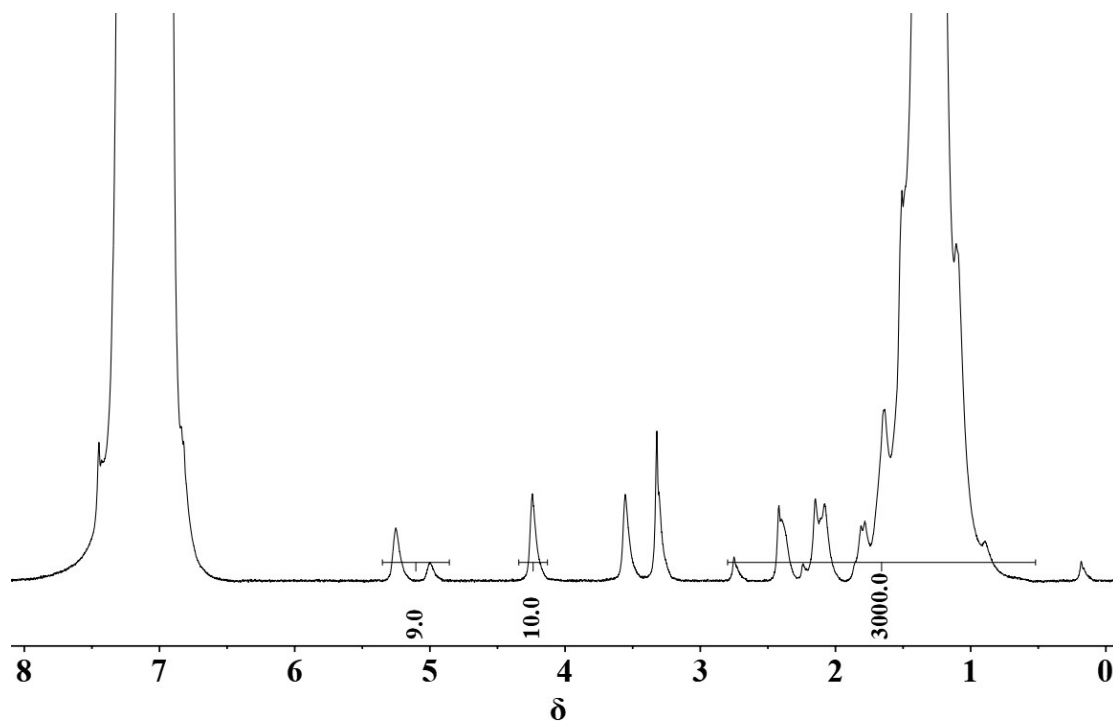

**$^1\text{H}$  NMR spectrum of polymer in Entry 20, Table3**

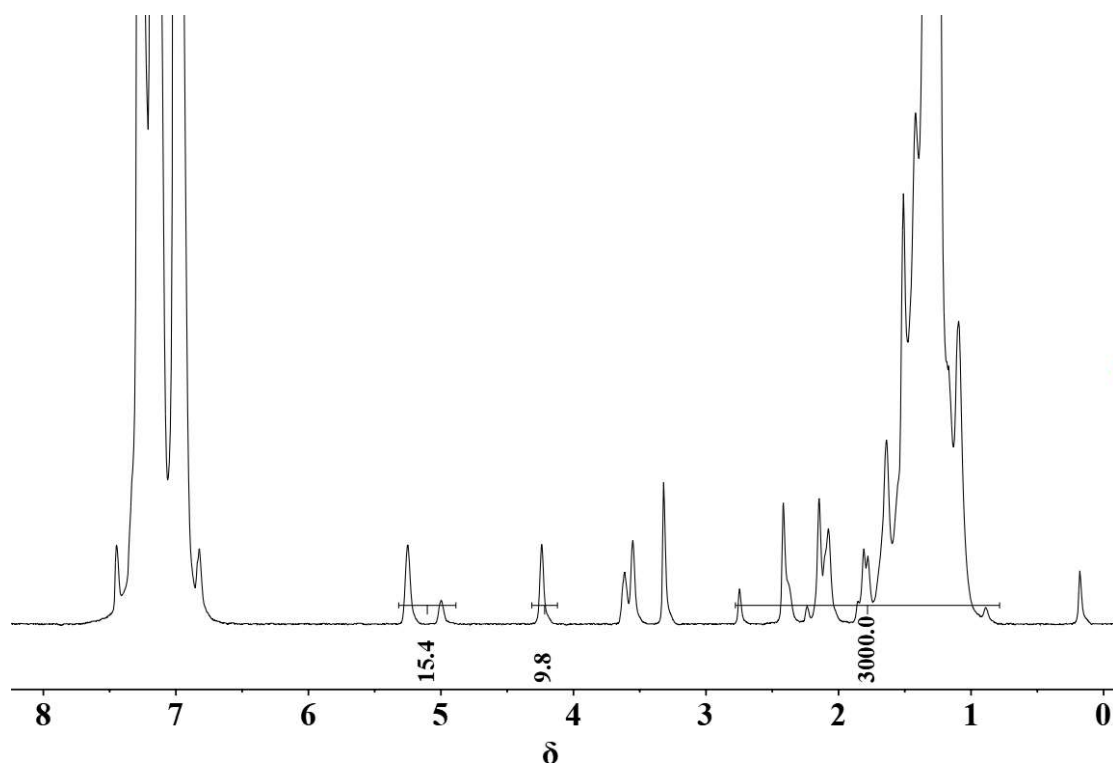

**<sup>1</sup>H NMR spectrum of polymer in Entry 21, Table3**

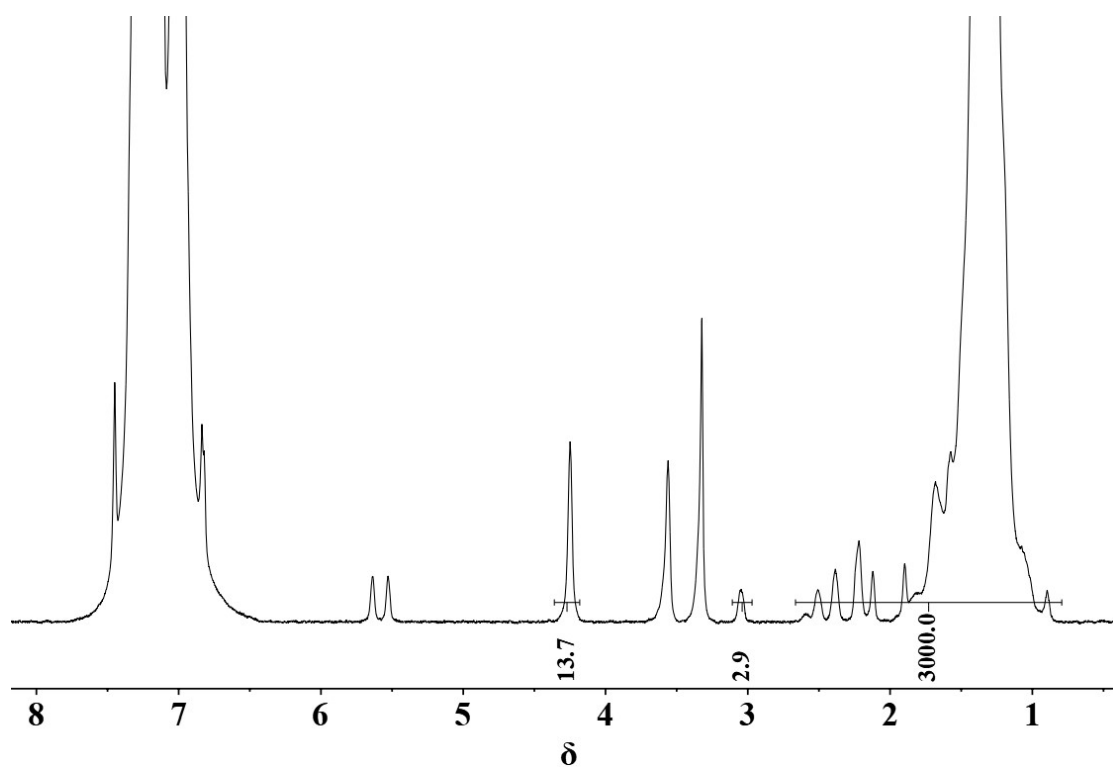

**<sup>1</sup>H NMR spectrum of polymer in Entry 22, Table3**

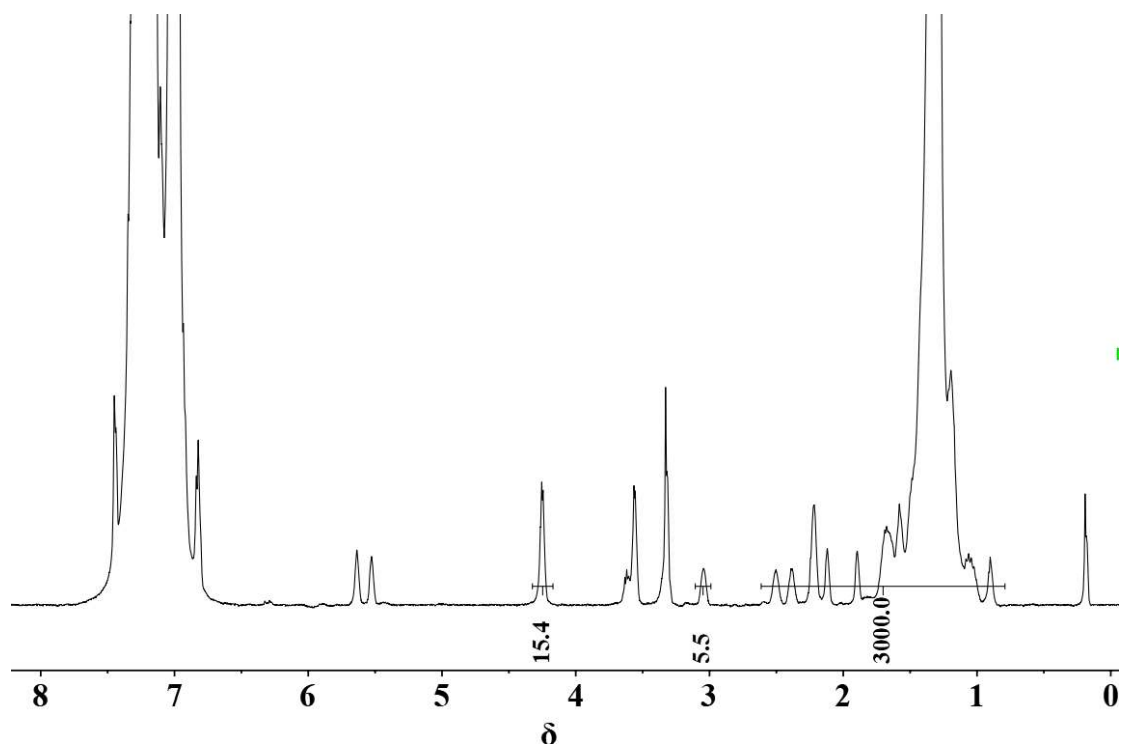

**<sup>1</sup>H NMR spectrum of polymer in Entry 23, Table3**

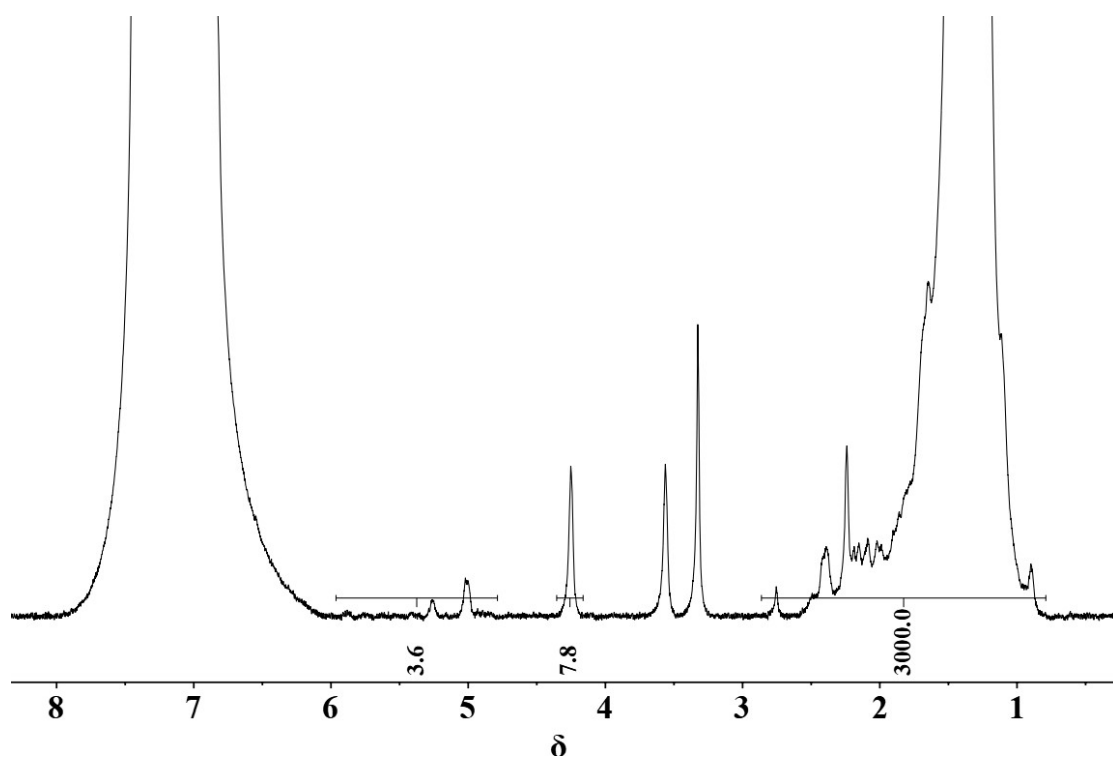

**<sup>1</sup>H NMR spectrum of polymer in Entry 24, Table3**

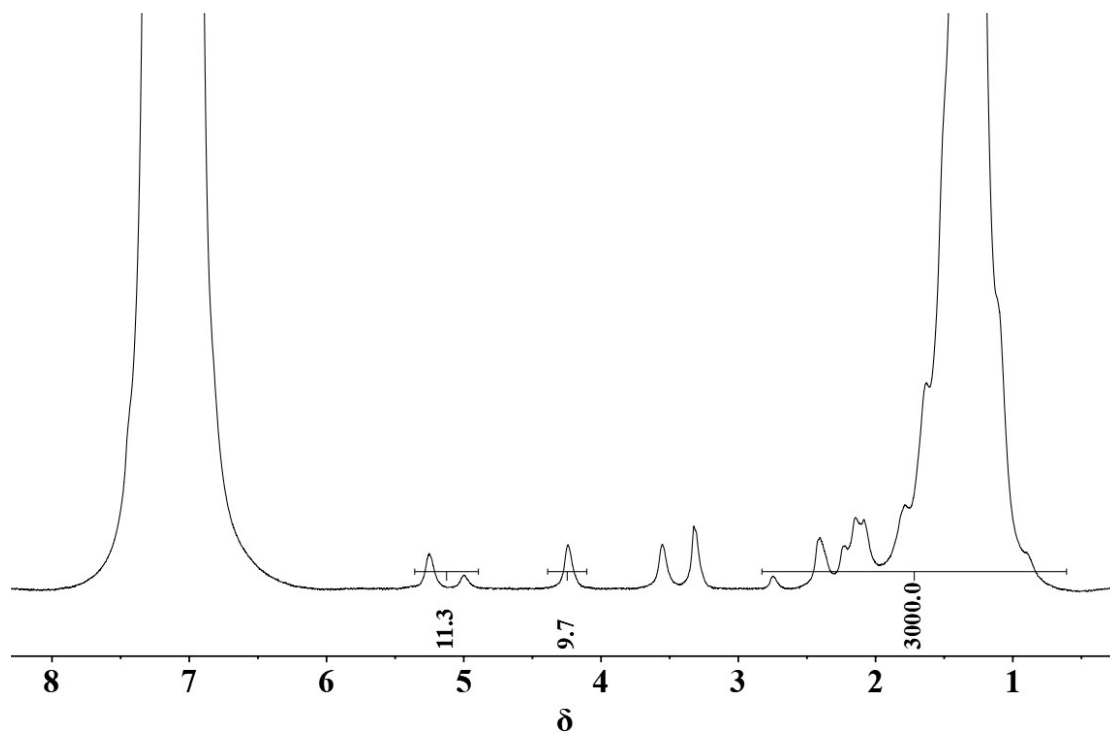

**<sup>1</sup>H NMR spectrum of polymer in Entry 25, Table3**

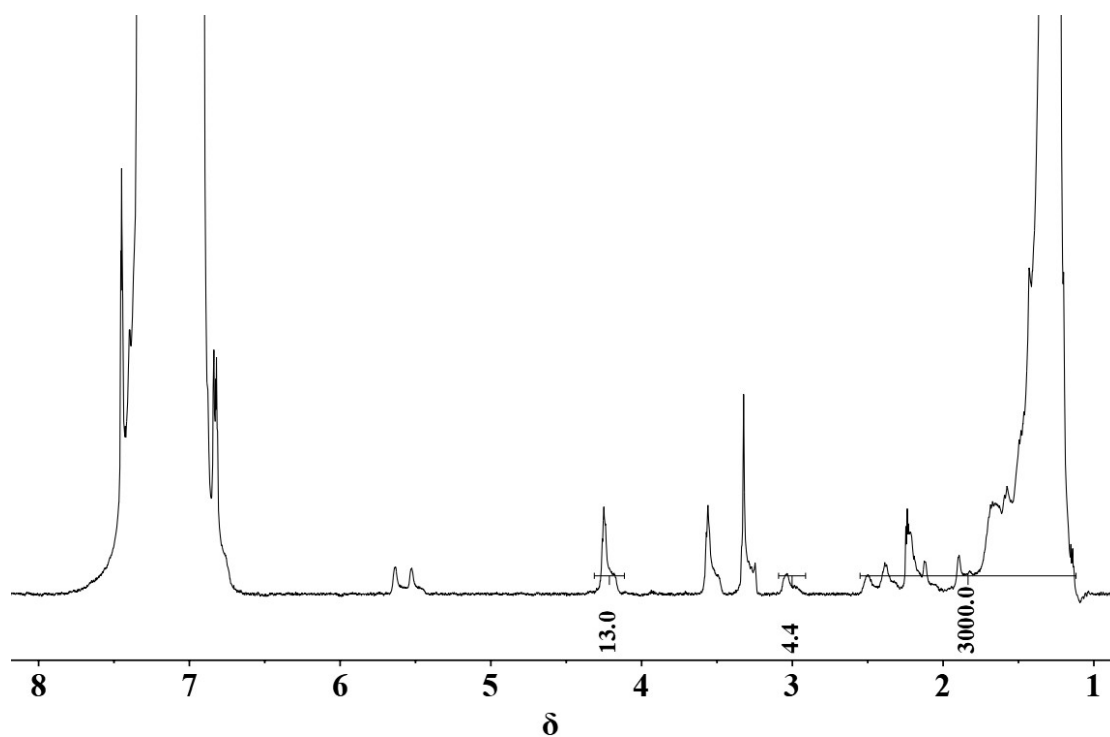

**<sup>1</sup>H NMR spectrum of polymer in Entry 26, Table3**



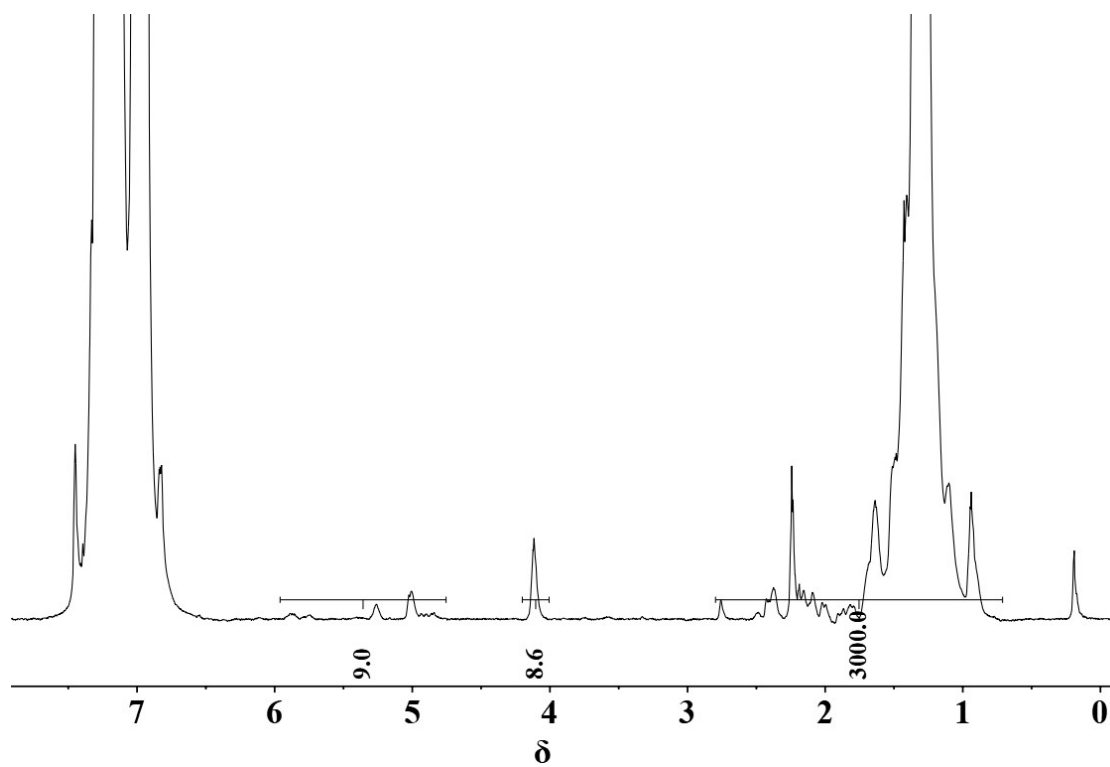

**<sup>1</sup>H NMR spectrum of polymer in Entry 27, Table3**

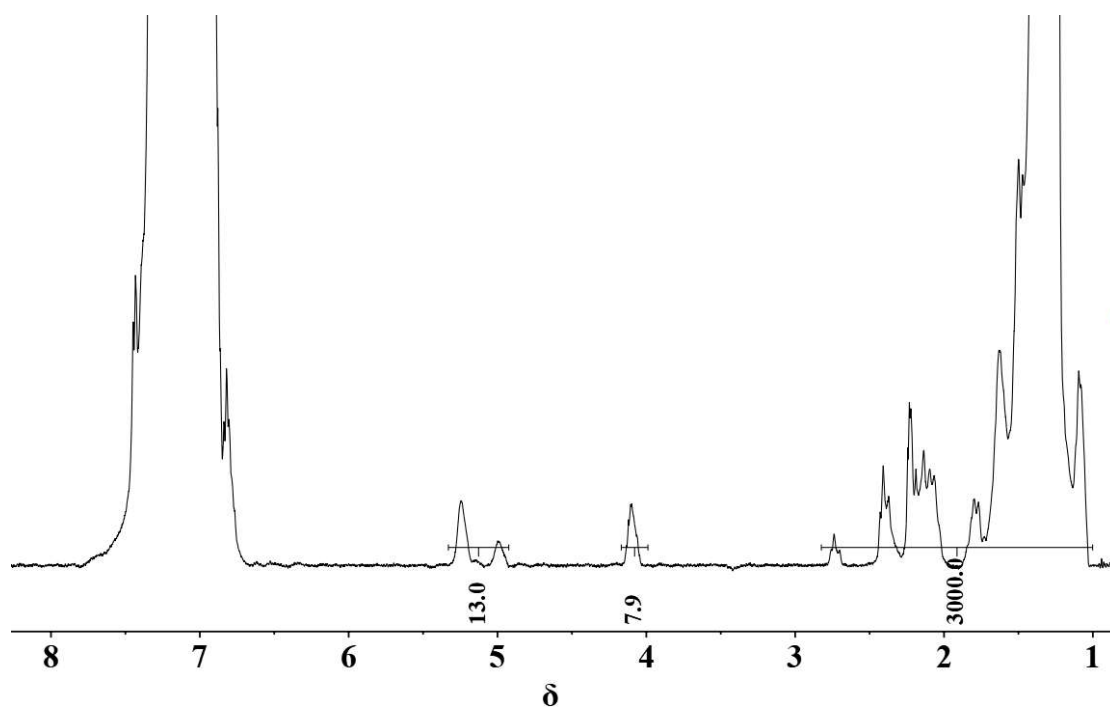

**<sup>1</sup>H NMR spectrum of polymer in Entry 28, Table3**

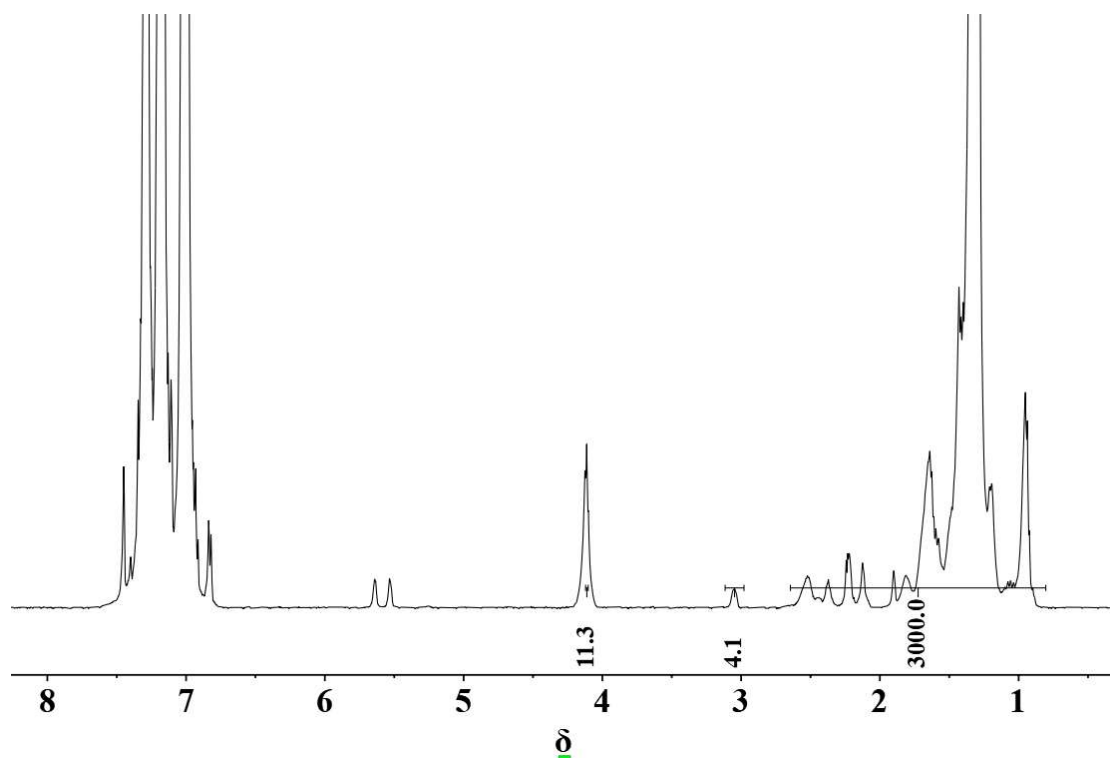

$^1\text{H}$  NMR spectrum of polymer in Entry 29, Table3

# GPC spectra of polymers

MW Averages  
Mp: 210028 Mn: 131543 Mv: 255420 Mw: 279836  
Mz: 500685 Mz+1: 751144 PD: 2.1273

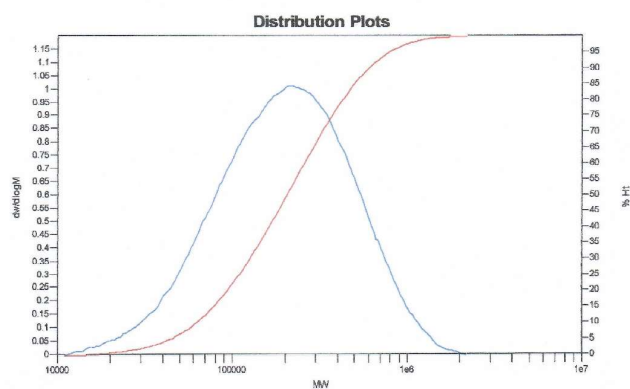

GPC spectrum of PE in Entry 2, Table 1

MW Averages  
Mp: 151213 Mn: 94246 Mv: 177058 Mw: 193115  
Mz: 339024 Mz+1: 509520 PD: 2.0491

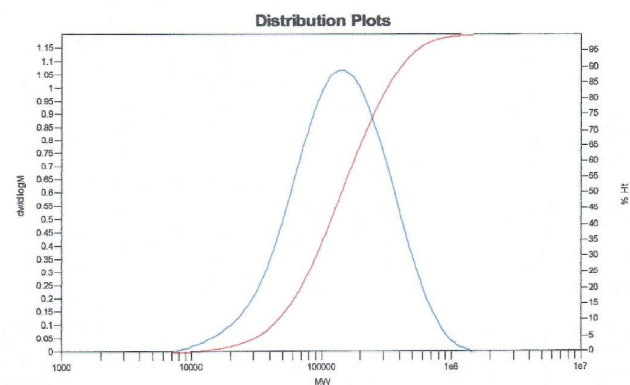

GPC spectrum of PE in Entry 3, Table 1

MW Averages  
Mp: 273167 Mn: 146835 Mv: 292494 Mw: 322043  
Mz: 590986 Mz+1: 888243 PD: 2.1932

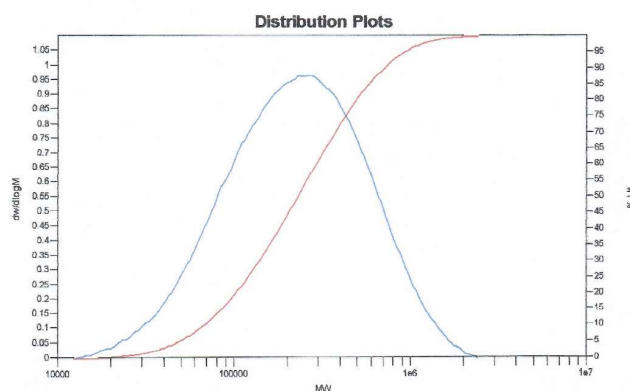

GPC spectrum of PE in Entry 4, Table 1

**MW Averages**  
 Mp: 106510      Mn: 77280      Mv: 136666      Mw: 148183  
 Mz: 251118      Mz+1: 368120      PD: 1.9175

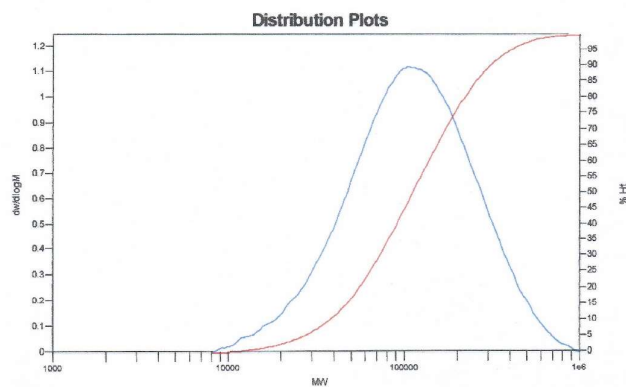

GPC spectrum of PE in Entry 5, Table 1

**MW Averages**  
 Mp: 157985      Mn: 107879      Mv: 189545      Mw: 205496  
 Mz: 347229      Mz+1: 505280      PD: 1.9049

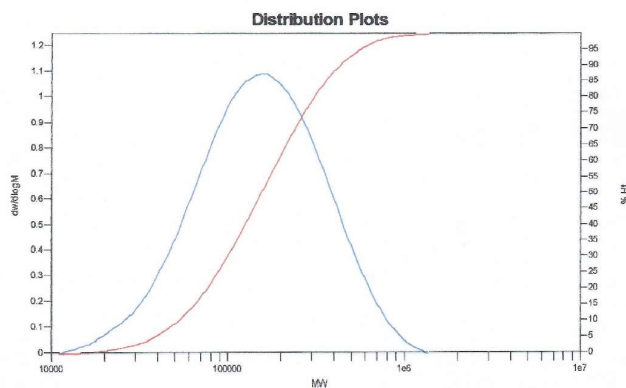

GPC spectrum of PE in Entry 6, Table 1

**MW Averages**  
 Mp: 193340      Mn: 104596      Mv: 255112      Mw: 286093  
 Mz: 577748      Mz+1: 905677      PD: 2.7352

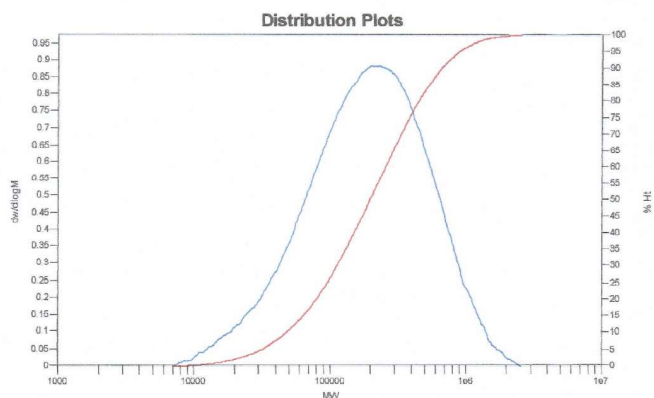

GPC spectrum of PE in Entry 7, Table 1

MW Averages  
 Mp: 269914 Mn: 129329 Mv: 332636 Mw: 376001  
 Mz: 794800 Mz+1: 1273187 PD: 2.9073

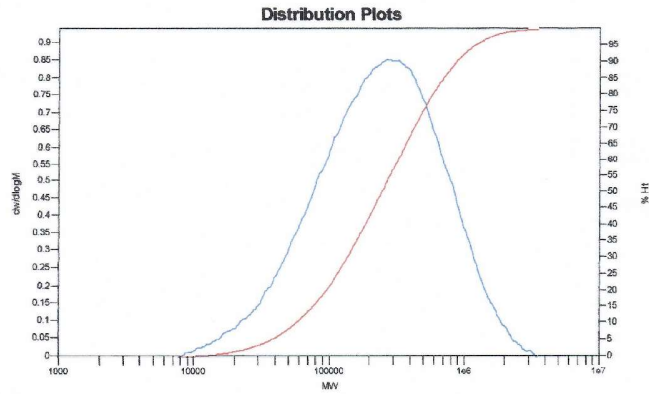

GPC spectrum of PE in Entry 8, Table 1

MW Averages  
 Mp: 215511 Mn: 58695 Mv: 217713 Mw: 249142  
 Mz: 532366 Mz+1: 808622 PD: 4.2447

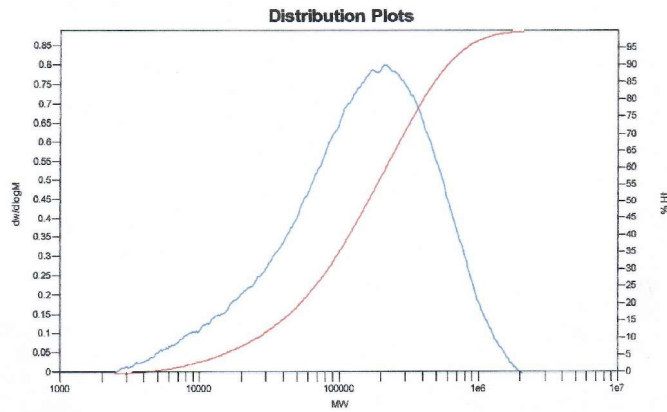

GPC spectrum of PE in Entry 9, Table 1

MW Averages  
 Mp: 263908 Mn: 138422 Mv: 300181 Mw: 333504  
 Mz: 639746 Mz+1: 970691 PD: 2.4093

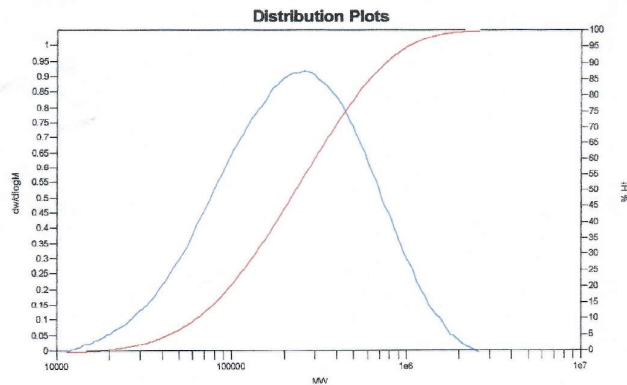

GPC spectrum of PE in Entry 10, Table 1

**MW Averages**  
 Mp: 106699      Mn: 37339      Mv: 126519      Mw: 143958  
 Mz: 301470      Mz+1: 461499      PD: 3.8554

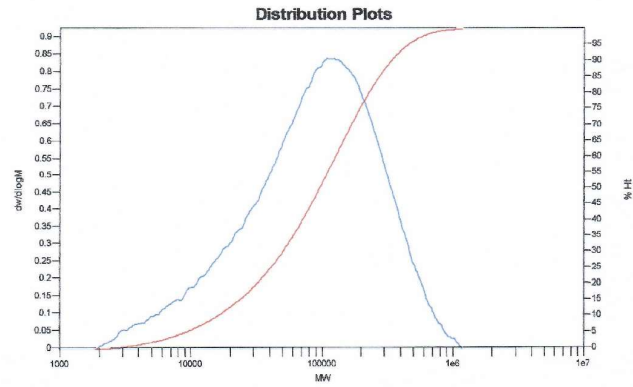

GPC spectrum of PE in Entry 11, Table 1

**MW Averages**  
 Mp: 143718      Mn: 75826      Mv: 176524      Mw: 196713  
 Mz: 381910      Mz+1: 580468      PD: 2.5943

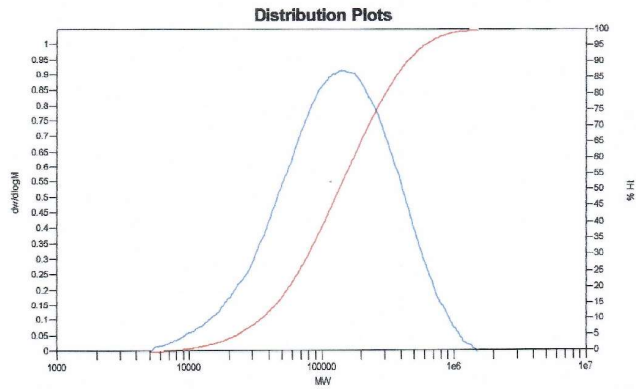

GPC spectrum of PE in Entry 12, Table 1

**MW Averages**  
 Mp: 184163      Mn: 118746      Mv: 257060      Mw: 287754  
 Mz: 593393      Mz+1: 964680      PD: 2.4233

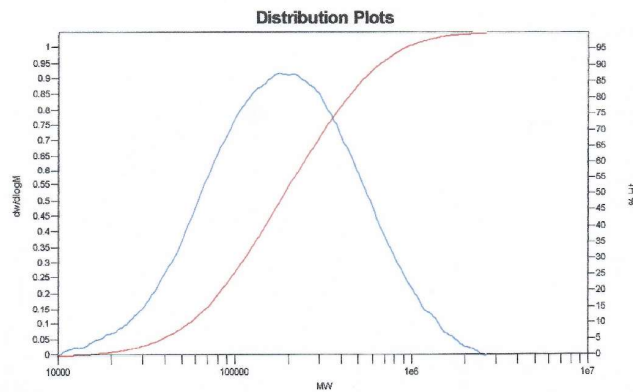

GPC spectrum of PE in Entry 1, Table 1

**MW Averages**  
 Mp: 26225      Mn: 13155      Mv: 29036      Mw: 32145  
 Mz: 60384      Mz+1: 92243      PD: 2.4436

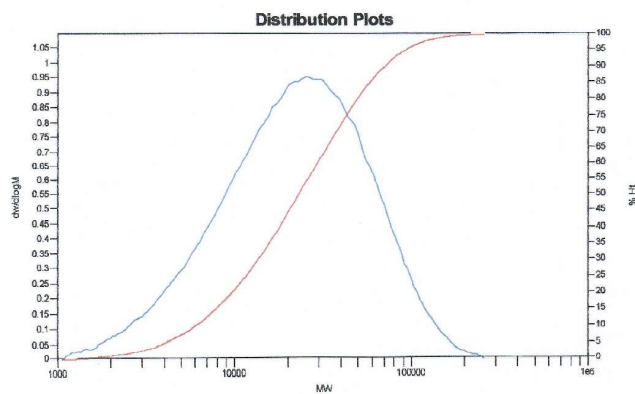

GPC spectrum of PE in Entry 13, Table 1

**MW Averages**  
 Mp: 34187      Mn: 17649      Mv: 34222      Mw: 37362  
 Mz: 64559      Mz+1: 93172      PD: 2.1169

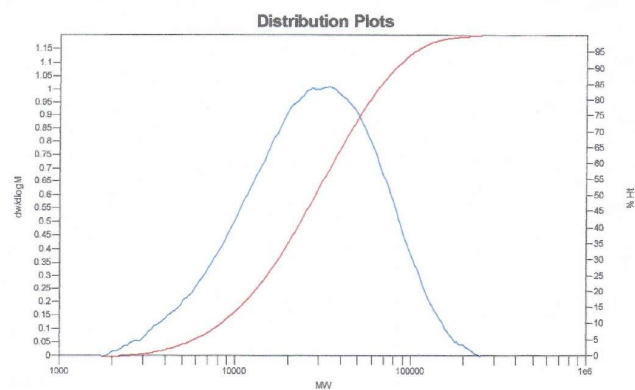

GPC spectrum of PE in Entry 14, Table 1

**MW Averages**  
 Mp: 21212      Mn: 5640      Mv: 22282      Mw: 25526  
 Mz: 54085      Mz+1: 81210      PD: 4.5259

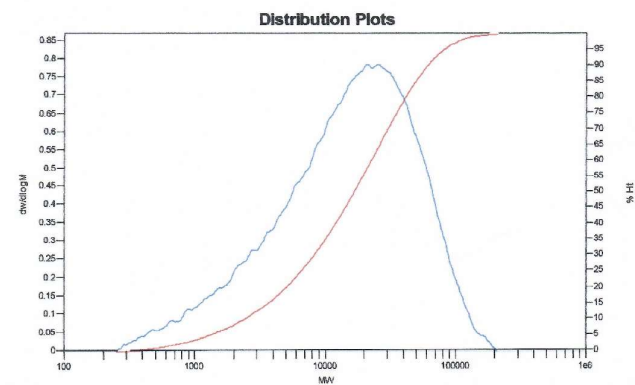

GPC spectrum of PE in Entry 15, Table 1

**MW Averages**  
Mp: 32397      Mn: 17418      Mv: 30416      Mw: 32701  
Mz: 51630      Mz+1: 71213      PD: 1.8774

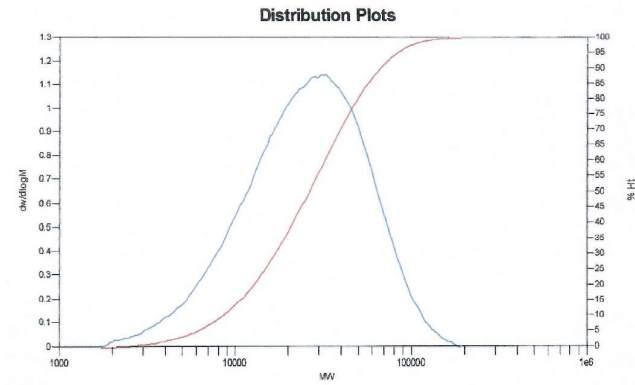

**MW Averages**  
Mp: 17263      Mn: 10744      Mv: 19107      Mw: 20629  
Mz: 33593      Mz+1: 47529      PD: 1.9200

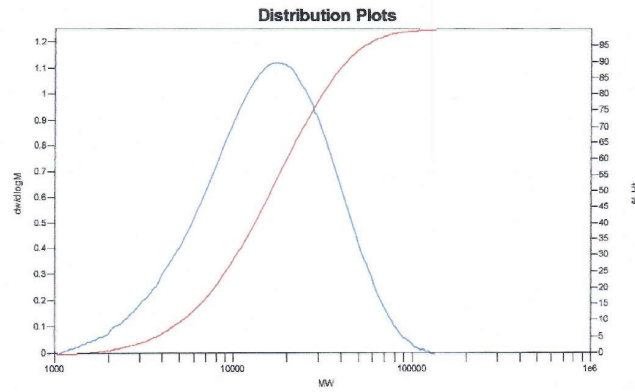

**MW Averages**  
Mp: 18120      Mn: 8403      Mv: 20302      Mw: 22534  
Mz: 42088      Mz+1: 62157      PD: 2.8817

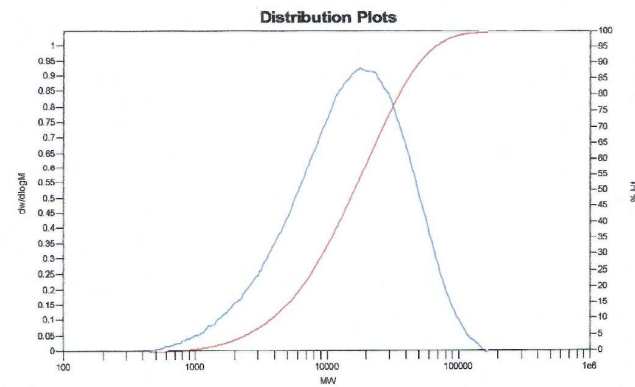



**MW Averages**  
 Mp: 140737      Mn: 93121      Mv: 164166      Mw: 177882  
 Mz: 206823      Mz+1: 437862      PD: 1.9102

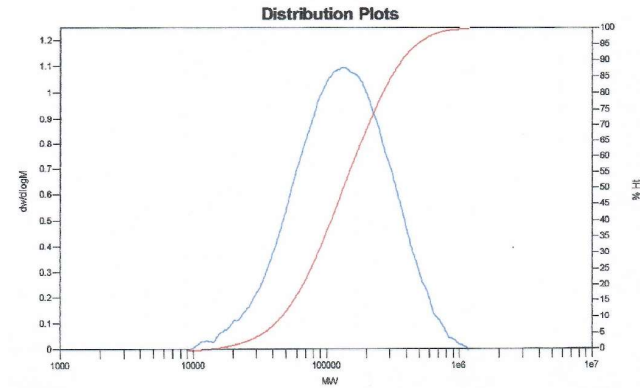

GPC spectrum of PE in Entry 19, Table 1

**MW Averages**  
 Mp: 163004      Mn: 108958      Mv: 183038      Mw: 197934  
 Mz: 330486      Mz+1: 482132      PD: 1.8506

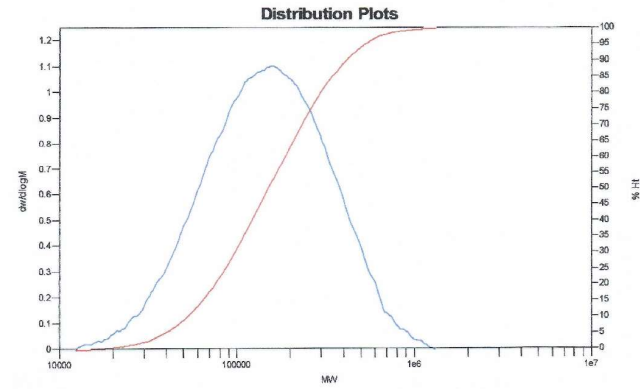

GPC spectrum of PE in Entry 20, Table 1

**MW Averages**  
 Mp: 83289      Mn: 58195      Mv: 96769      Mw: 104387  
 Mz: 172845      Mz+1: 256127      PD: 1.8578

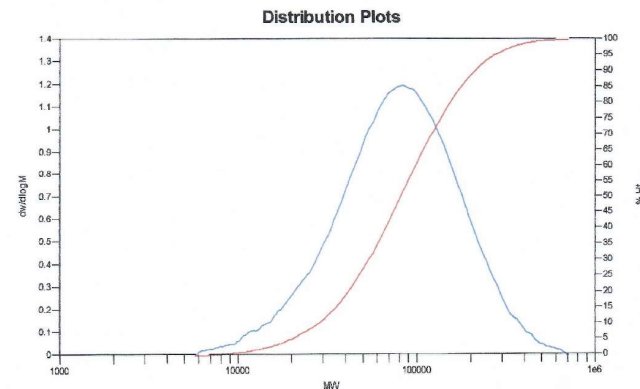

GPC spectrum of PE in Entry 21, Table 1

**MW Averages**  
 Mp: 89390      Mn: 64422      Mv: 115041      Mw: 125667  
 Mz: 227159      Mz+1: 354308      PD: 1.9507

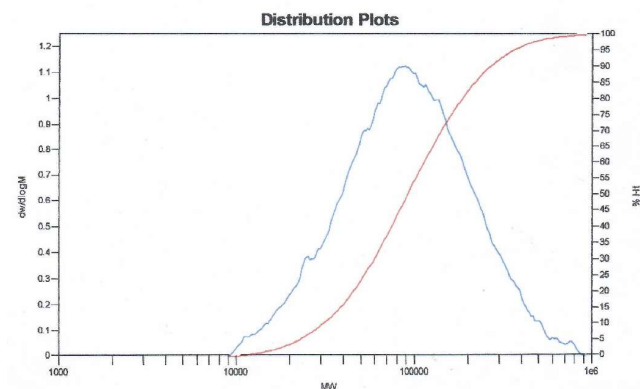

GPC spectrum of PE in Entry 23, Table 1

**MW Averages**  
 Mp: 78207      Mn: 56727      Mv: 95450      Mw: 102823  
 Mz: 168435      Mz+1: 245970      PD: 1.8126

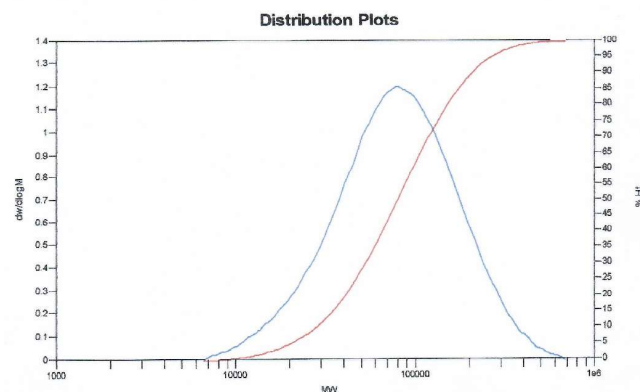

GPC spectrum of PE in Entry 24, Table 1

**MW Averages**  
 Mp: 192572      Mn: 53306      Mv: 213881      Mw: 248456  
 Mz: 648672      Mz+1: 848318      PD: 4.6234

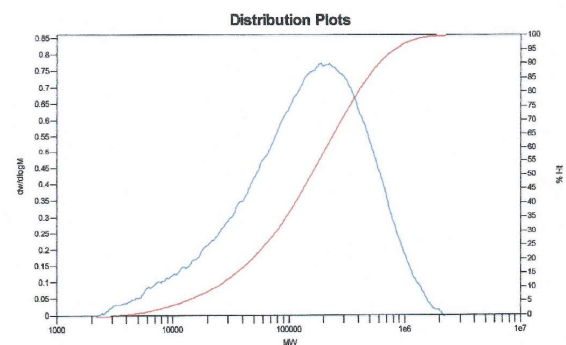

GPC spectrum of PE in Entry 25, Table 1

MW Averages  
 Mp: 210715 Mn: 58783 Mv: 197382 Mw: 225656  
 Mz: 485292 Mz+1: 746951 PD: 3.8388

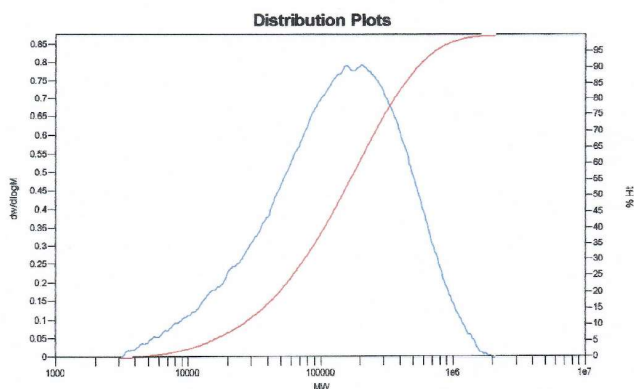

GPC spectrum of PE in Entry 26, Table 1

MW Averages  
 Mp: 120054 Mn: 61584 Mv: 145627 Mw: 164286  
 Mz: 349140 Mz+1: 568834 PD: 2.6677

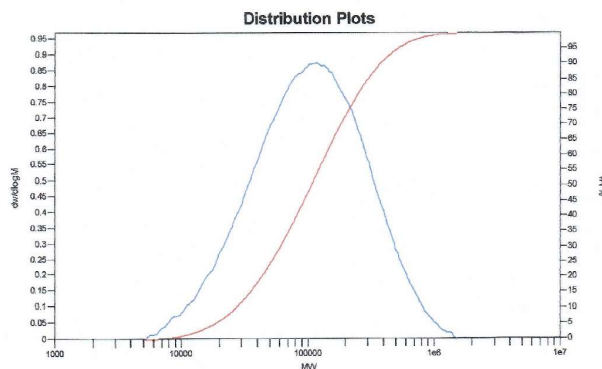

GPC spectrum of PE in Entry 27, Table 1

MW Averages  
 Mp: 281257 Mn: 152888 Mv: 269348 Mw: 291723  
 Mz: 485709 Mz+1: 694196 PD: 1.9081

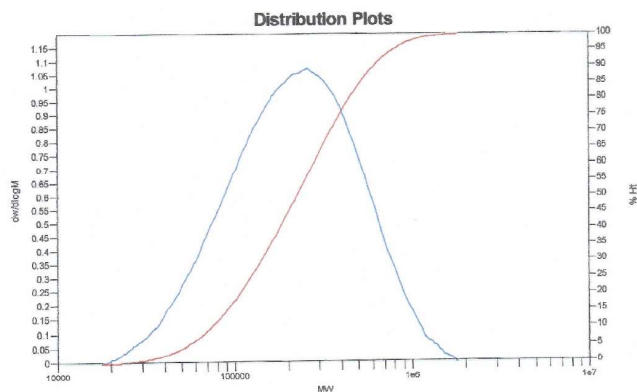

GPC spectrum of polymer in Entry 1, Table 2

MW Averages  
Mp: 188411 Mn: 116054 Mv: 219324 Mw: 240244  
Mz: 435057 Mz+1: 668076 PD: 2.0701

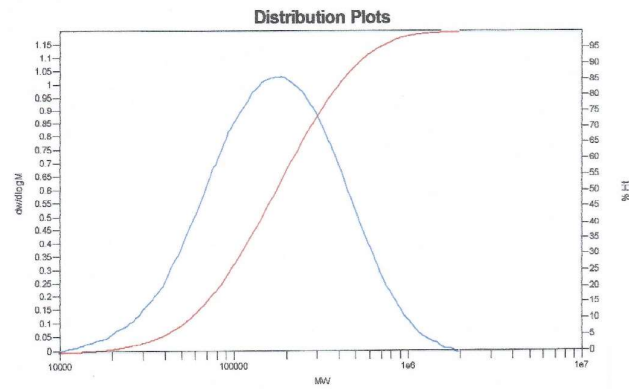

GPC spectrum of polymer in Entry 2, Table 2

MW Averages  
Mp: 250115 Mn: 167310 Mv: 311334 Mw: 339911  
Mz: 592725 Mz+1: 881156 PD: 2.0316

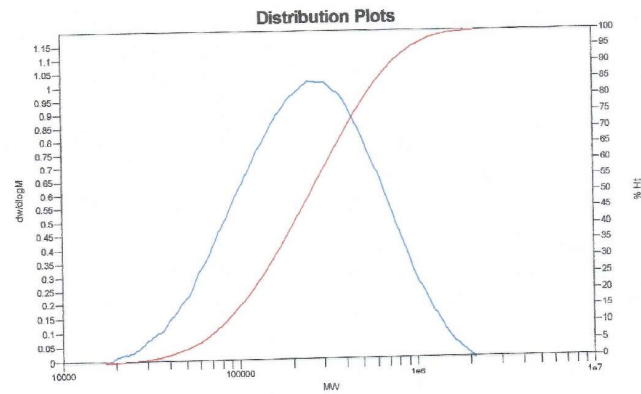

GPC spectrum of polymer in Entry 3, Table 2

MW Averages  
Mp: 311014 Mn: 182072 Mv: 311224 Mw: 334904  
Mz: 532826 Mz+1: 734396 PD: 1.8394

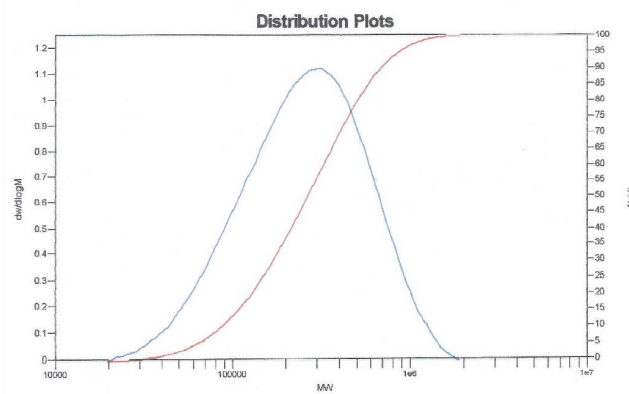

GPC spectrum of polymer in Entry 4, Table 2

**MW Averages**  
 Mp: 121850      Mn: 85511      Mv: 151784      Mw: 164380  
 Mz: 274659      Mz+1: 394341      PD: 1.9223

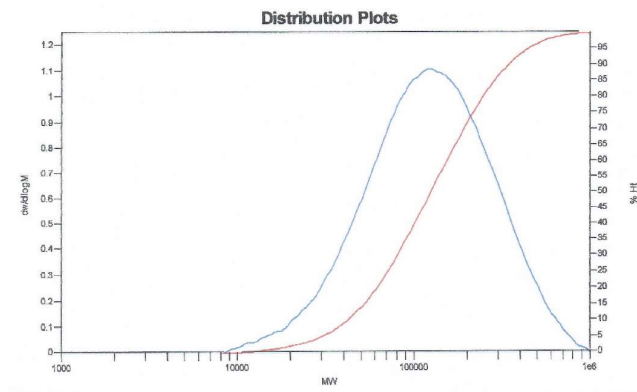

GPC spectrum of polymer in Entry 5, Table 2

**MW Averages**  
 Mp: 108868      Mn: 62665      Mv: 139658      Mw: 155283  
 Mz: 303364      Mz+1: 477038      PD: 2.4780

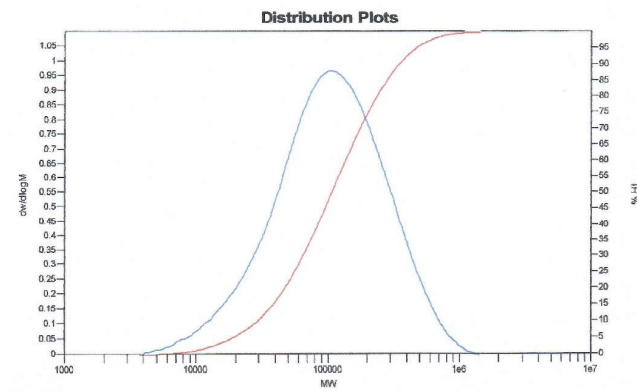

GPC spectrum of polymer in Entry 6, Table 2

**MW Averages**  
 Mp: 89390      Mn: 60925      Mv: 109029      Mw: 116283  
 Mz: 200332      Mz+1: 291426      PD: 1.9415

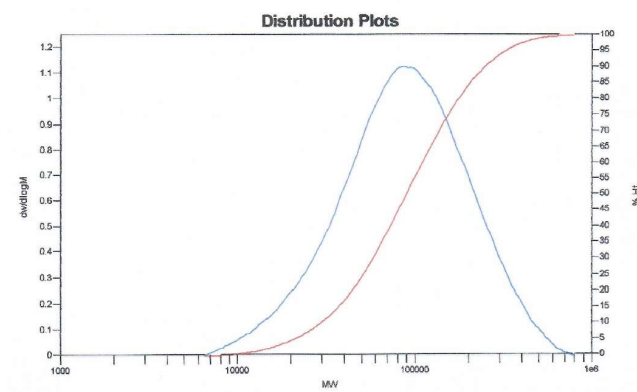

GPC spectrum of polymer in Entry 7, Table 2

MW Averages  
 Mp: 148253 Mn: 91479 Mv: 177616 Mw: 194206  
 Mz: 343861 Mz+1: 512978 PD: 2.1230

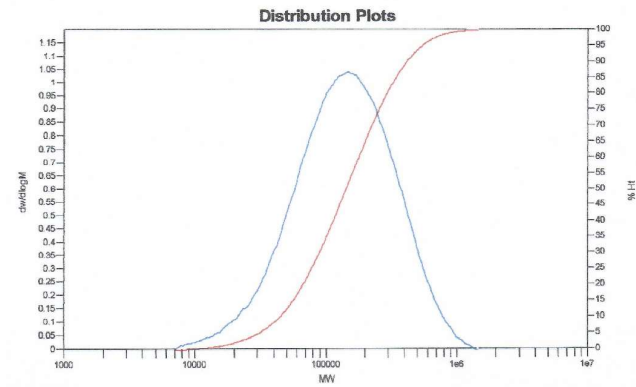

GPC spectrum of polymer in Entry 8, Table 2

MW Averages  
 Mp: 178270 Mn: 111693 Mv: 208158 Mw: 224692  
 Mz: 392351 Mz+1: 585289 PD: 2.0117

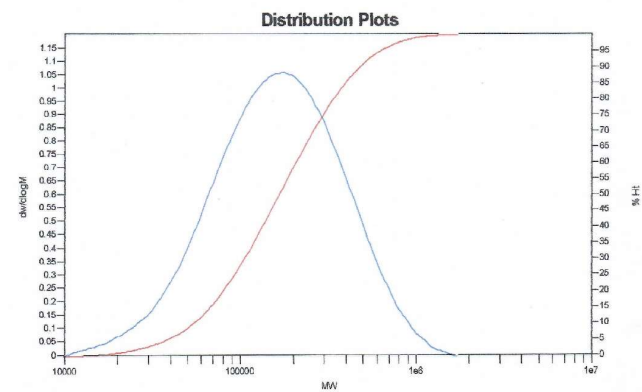

GPC spectrum of polymer in Entry 10, Table 2

MW Averages  
 Mp: 148492 Mn: 99389 Mv: 177907 Mw: 193241  
 Mz: 331507 Mz+1: 491554 PD: 1.9443

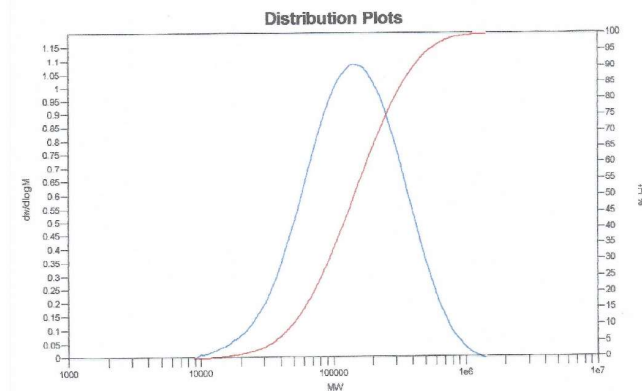

GPC spectrum of polymer in Entry 11, Table 2

MW Averages  
 Mp: 180058      Mn: 115350      Mv: 203670      Mw: 220861  
 Mz: 374758      Mz+1: 547210      PD: 1.9156

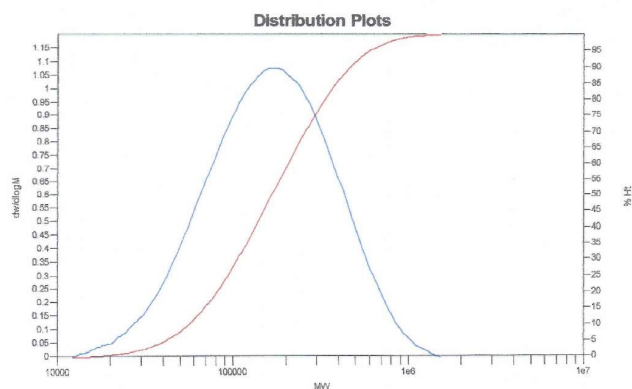

GPC spectrum of polymer in Entry 12, Table 2

MW Averages  
 Mp: 139251      Mn: 98244      Mv: 198102      Mw: 219840  
 Mz: 435106      Mz+1: 709600      PD: 2.2377

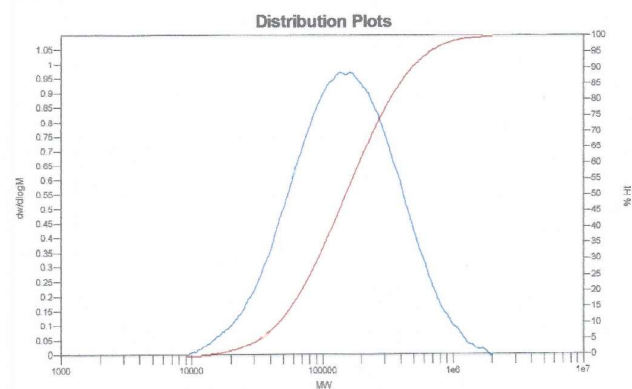

GPC spectrum of polymer in Entry 13, Table 2

MW Averages  
 Mp: 57870      Mn: 32777      Mv: 81033      Mw: 66013  
 Mz: 108511      Mz+1: 155426      PD: 2.0140

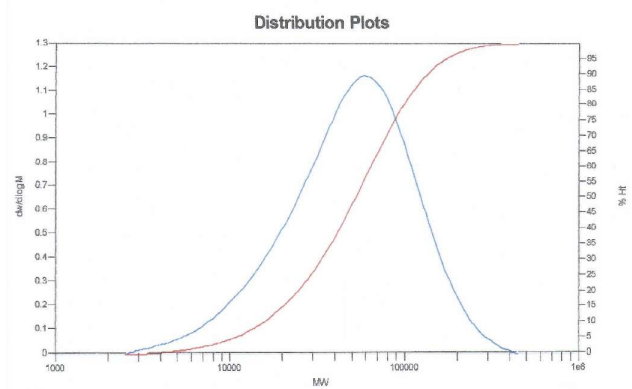

GPC spectrum of polymer in Entry 14, Table 2

MW Averages  
 Mp: 218334 Mn: 140089 Mv: 254268 Mw: 277011  
 Mz: 480758 Mz+1: 709181 PD: 1.9774

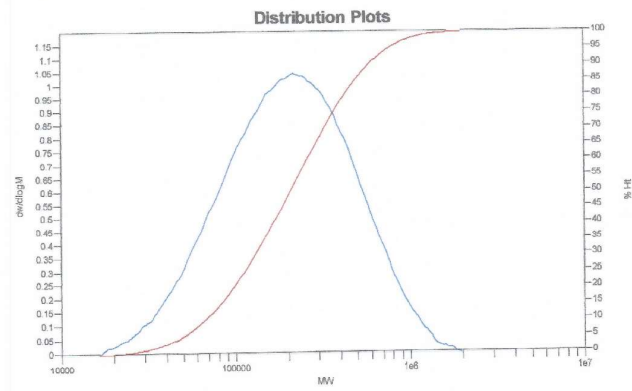

GPC spectrum of polymer in Entry 15, Table 2

MW Averages  
 Mp: 158346 Mn: 102295 Mv: 182770 Mw: 198411  
 Mz: 337898 Mz+1: 485443 PD: 1.9396

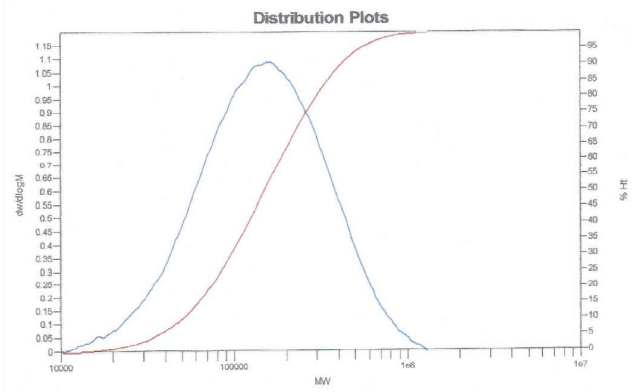

GPC spectrum of polymer in Entry 16, Table 2

MW Averages  
 Mp: 154562 Mn: 108911 Mv: 193354 Mw: 210411  
 Mz: 364831 Mz+1: 544204 PD: 1.9681

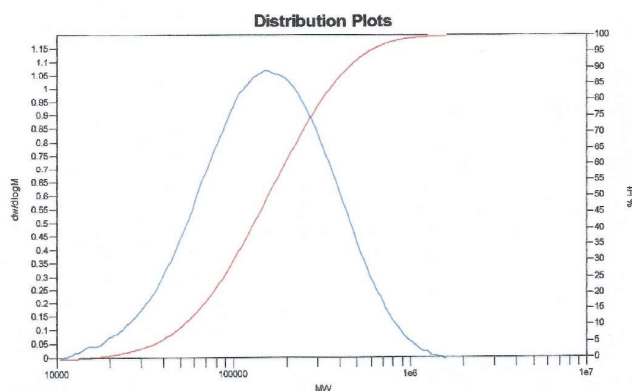

GPC spectrum of polymer in Entry 17, Table 2



**MW Averages**  
 Mp: 140737      Mn: 93118      Mv: 161734      Mw: 174966  
 Mz: 290897      Mz+1: 418111      PD: 1.8790

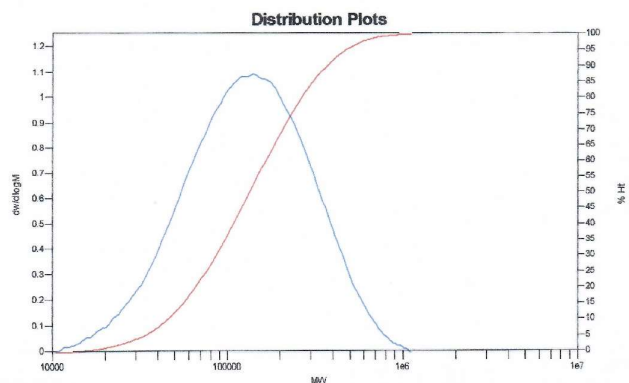

GPC spectrum of polymer in Entry 18, Table 2

**MW Averages**  
 Mp: 72225      Mn: 47206      Mv: 83448      Mw: 90277  
 Mz: 150990      Mz+1: 222000      PD: 1.9124

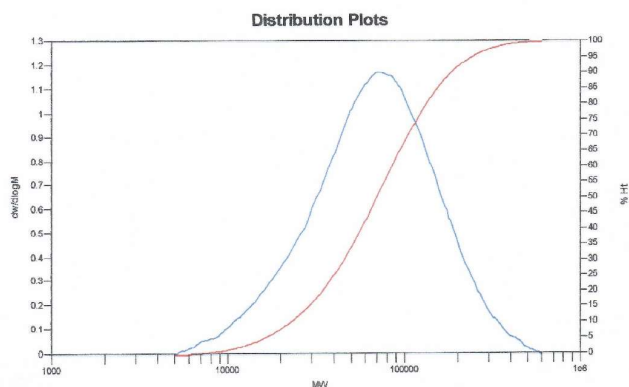

GPC spectrum of polymer in Entry 19, Table 2

**MW Averages**  
 Mp: 91790      Mn: 61243      Mv: 115180      Mw: 126239  
 Mz: 234913      Mz+1: 385358      PD: 2.0813

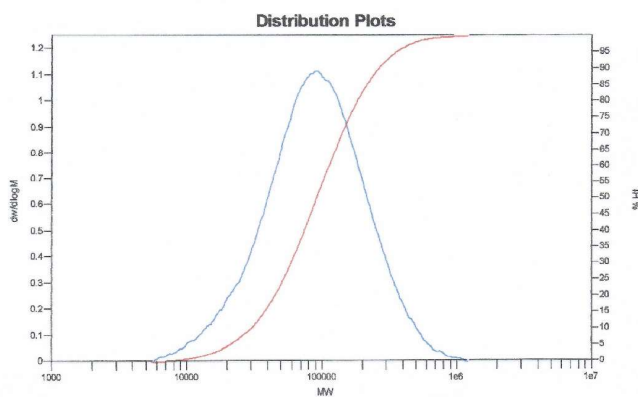

GPC spectrum of polymer in Entry 20, Table 2

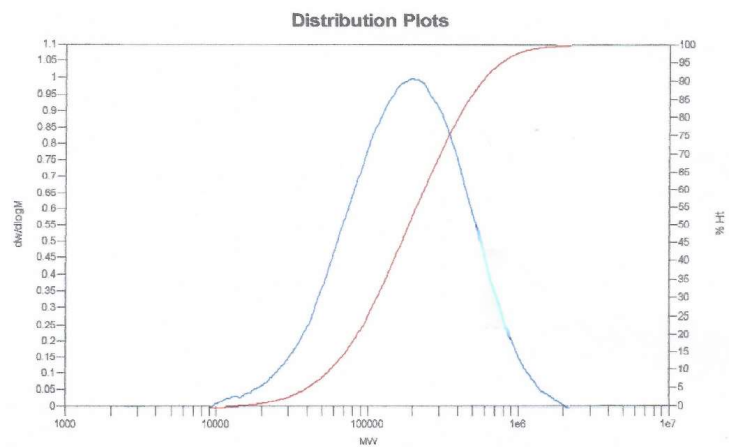

GPC spectrum of polymer in Entry 1, Table 3

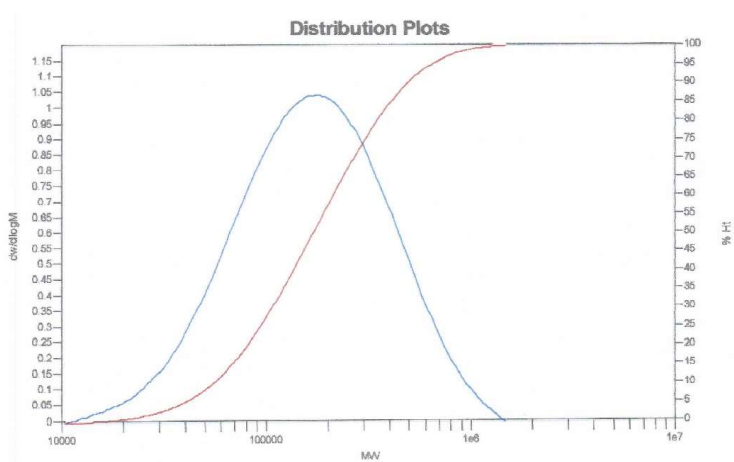

GPC spectrum of polymer in Entry 2, Table 3

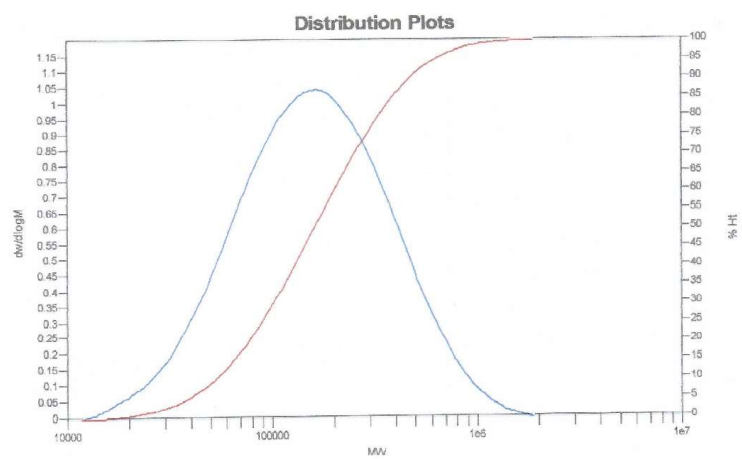

GPC spectrum of polymer in Entry 3, Table 3

MW Averages  
 Mp: 165275 Mn: 107557 Mv: 212693 Mw: 233993  
 Mz: 433837 Mz+1: 673496 PD: 2.1755

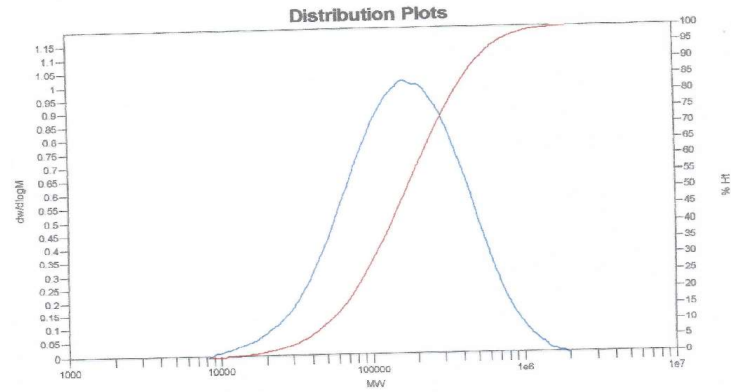

GPC spectrum of polymer in Entry 4, Table 3

MW Averages  
 Mp: 119865 Mn: 79493 Mv: 145045 Mw: 157646  
 Mz: 270984 Mz+1: 402052 PD: 1.9831

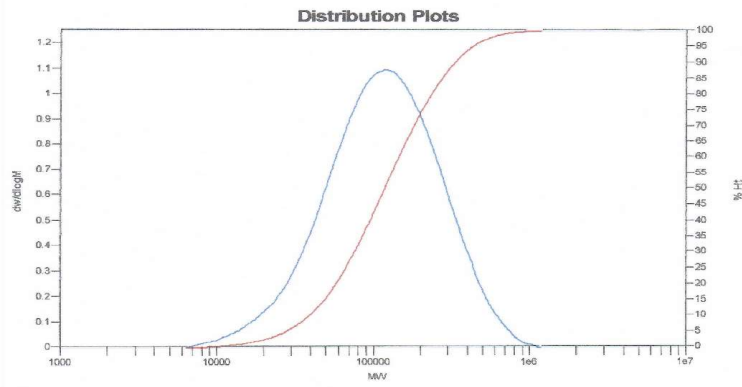

GPC spectrum of polymer in Entry 5, Table 3

MW Averages  
 Mp: 209180 Mn: 130910 Mv: 228256 Mw: 248082  
 Mz: 429836 Mz+1: 648556 PD: 1.8951

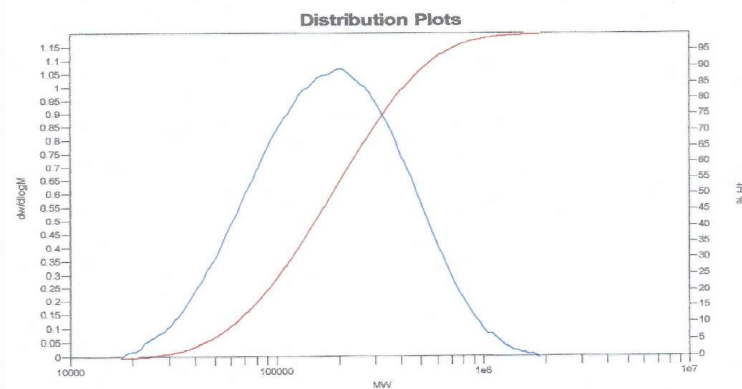

GPC spectrum of polymer in Entry 6, Table 3

MW Averages  
Mp: 168853 Mn: 105554 Mv: 196039 Mw: 213794  
Mz: 374237 Mz+1: 558021 PD: 2.0254

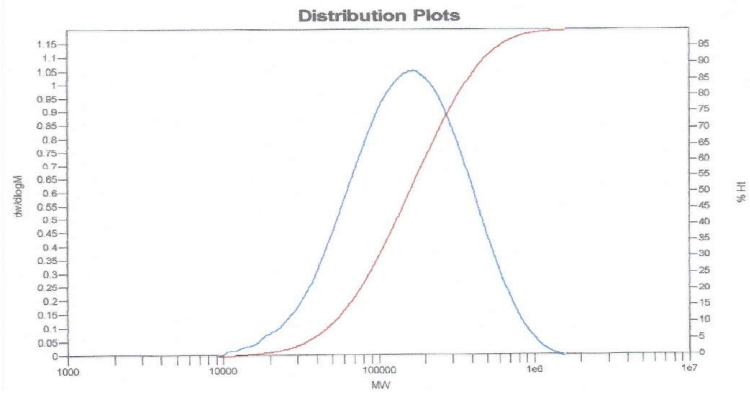

GPC spectrum of polymer in Entry 7, Table 3

MW Averages  
Mp: 187938 Mn: 114819 Mv: 208467 Mw: 227046  
Mz: 396001 Mz+1: 595655 PD: 1.9774

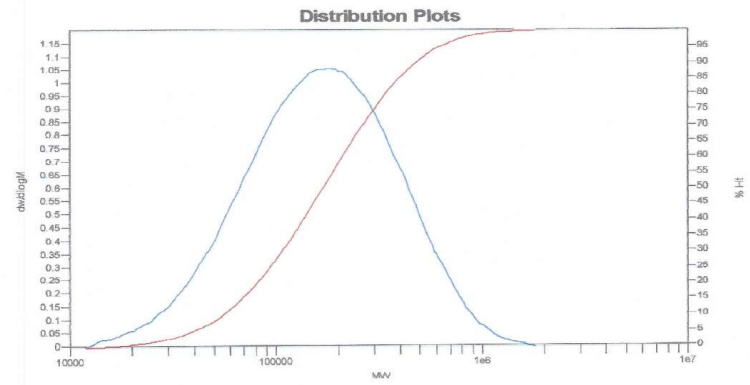

GPC spectrum of polymer in Entry 8, Table 3

MW Averages  
Mp: 151706 Mn: 96506 Mv: 170395 Mw: 184487  
Mz: 306769 Mz+1: 436469 PD: 1.9117

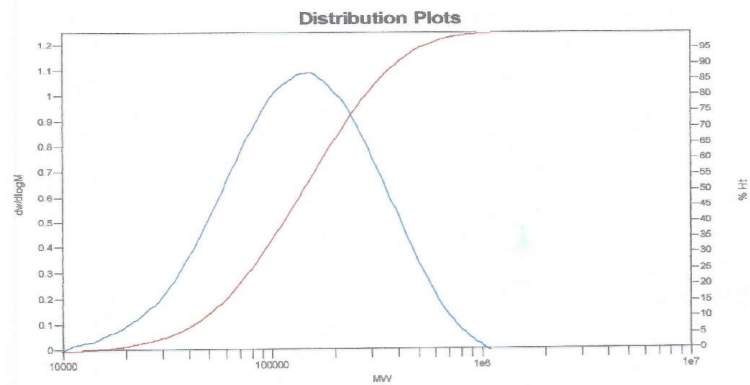

GPC spectrum of polymer in Entry 9, Table 3

MW Averages  
 Mp: 127819 Mn: 90882 Mv: 167354 Mw: 182471  
 Mz: 319527 Mz+1: 477544 PD: 2.0078

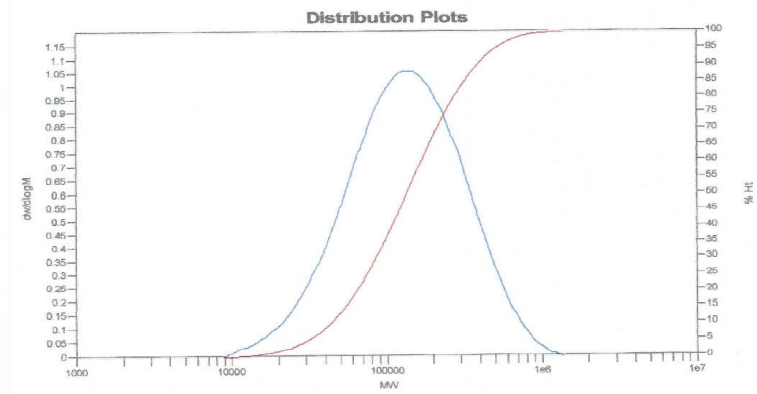

GPC spectrum of polymer in Entry 10, Table 3

MW Averages  
 Mp: 200409 Mn: 117519 Mv: 226347 Mw: 247593  
 Mz: 442304 Mz+1: 675905 PD: 2.1068

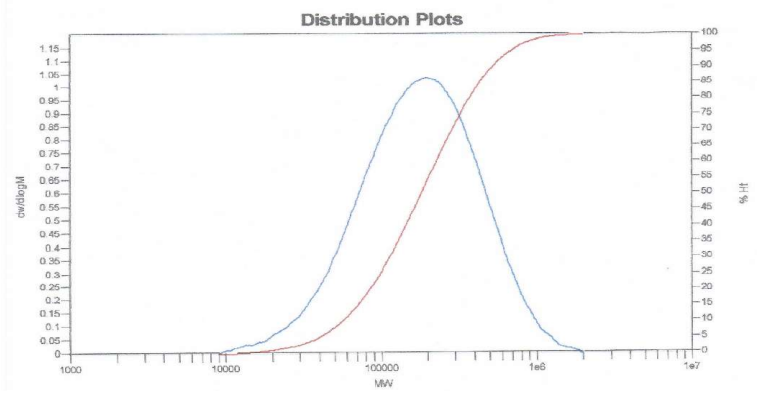

GPC spectrum of polymer in Entry 10, Table 3

MW Averages  
 Mp: 232823 Mn: 142792 Mv: 257129 Mw: 279037  
 Mz: 468879 Mz+1: 669002 PD: 1.9542

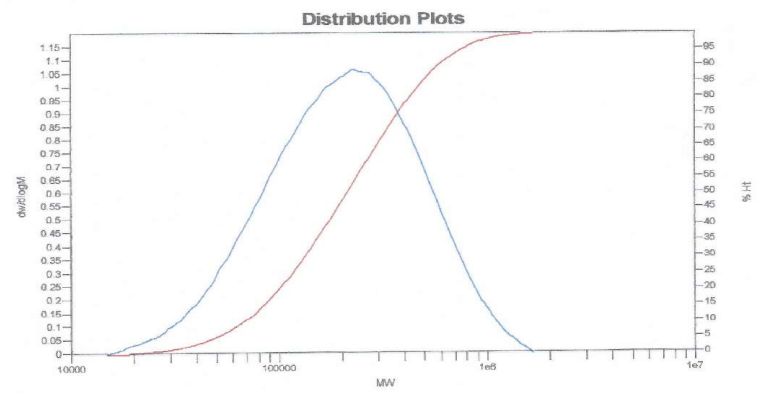

GPC spectrum of polymer in Entry 12, Table 3

MW Averages  
 Mp: 204748 Mn: 132473 Mv: 238118 Mw: 259247  
 Mz: 451193 Mz+1: 675894 PD: 1.9570

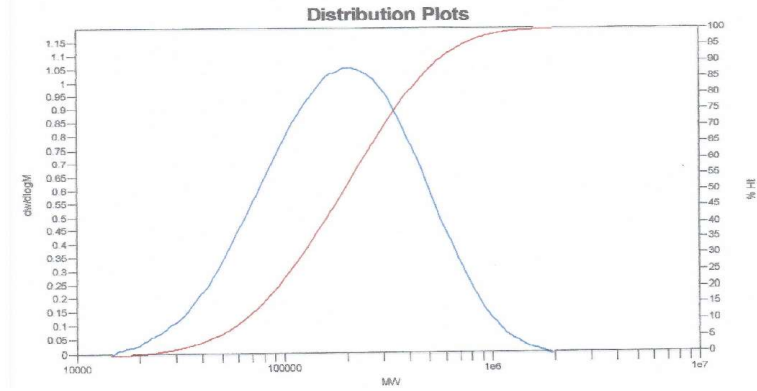

GPC spectrum of polymer in Entry 13, Table 3

MW Averages  
 Mp: 200409 Mn: 113705 Mv: 220905 Mw: 242870  
 Mz: 447926 Mz+1: 693087 PD: 2.1360

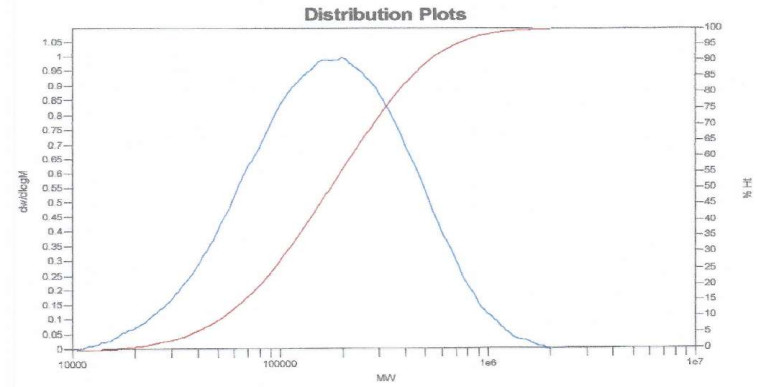

GPC spectrum of polymer in Entry 14, Table 3

MW Averages  
 Mp: 180058 Mn: 121510 Mv: 217196 Mw: 236004  
 Mz: 403688 Mz+1: 592142 PD: 1.9423

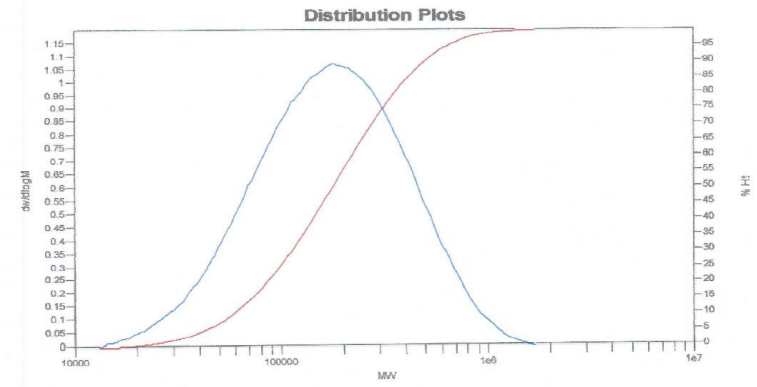

GPC spectrum of polymer in Entry 15, Table 3

MW Averages  
 Mp: 158346      Mn: 97974      Mv: 194141      Mw: 212812  
 Mz: 378349      Mz+1: 565560      PD: 2.1701

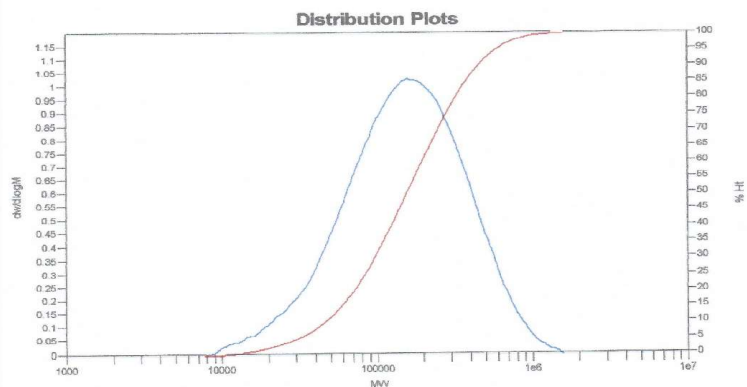

GPC spectrum of polymer in Entry 16, Table 3

MW Averages  
 Mp: 187938      Mn: 116810      Mv: 212013      Mw: 230819  
 Mz: 401974      Mz+1: 605157      PD: 1.9760

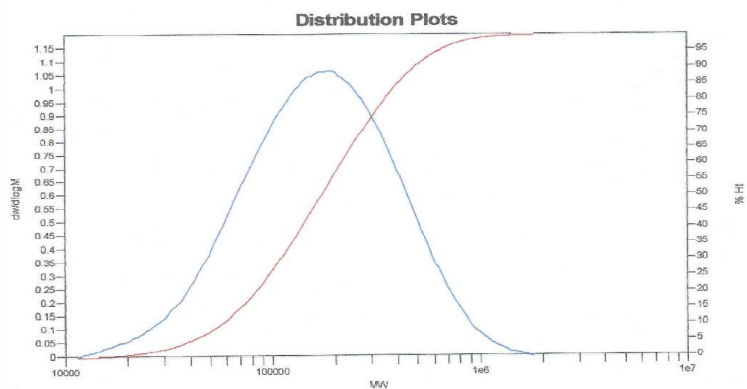

GPC spectrum of polymer in Entry 17, Table 3

MW Averages  
 Mp: 158346      Mn: 98932      Mv: 190799      Mw: 208297  
 Mz: 383241      Mz+1: 597361      PD: 2.0944

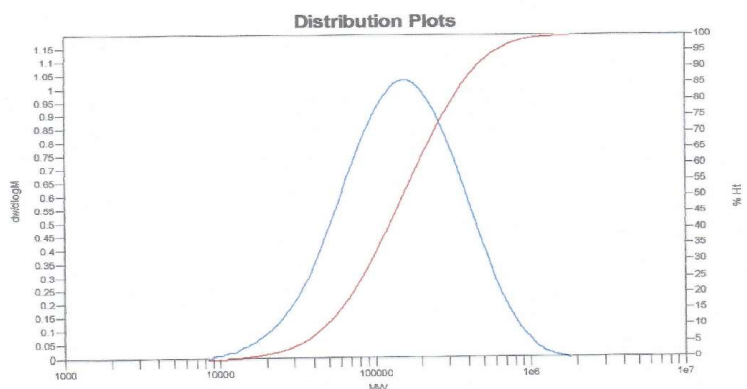

GPC spectrum of polymer in Entry 18, Table 3

MW Averages  
Mp: 139251 Mn: 86994 Mv: 171591 Mw: 188437  
Mz: 345751 Mz+1: 535444 PD: 2.1661

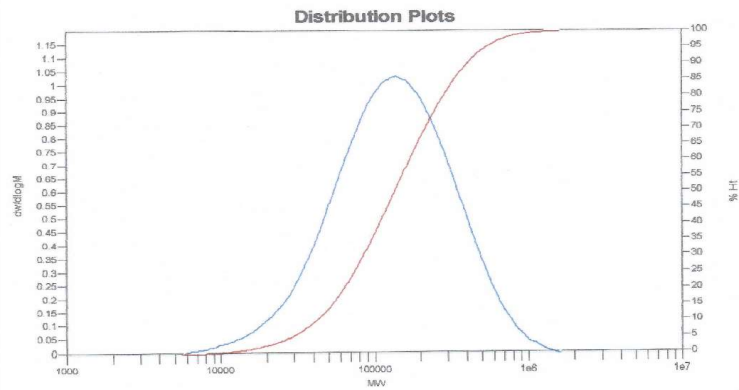

GPC spectrum of polymer in Entry 19, Table 3

MW Averages  
Mp: 154990 Mn: 96485 Mv: 176962 Mw: 192965  
Mz: 339738 Mz+1: 515436 PD: 1.9999

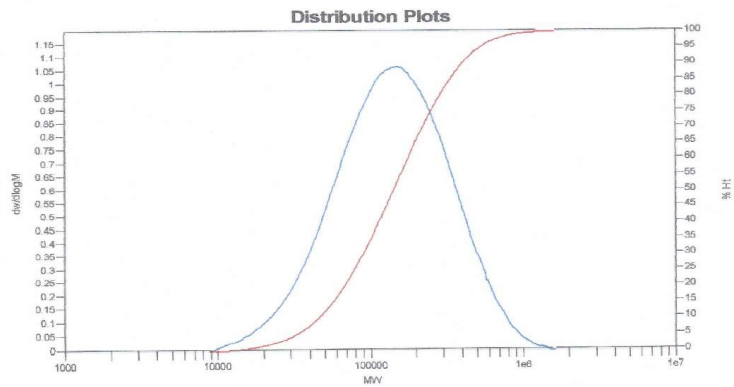

GPC spectrum of polymer in Entry 20, Table 3

MW Averages  
Mp: 136301 Mn: 92352 Mv: 160090 Mw: 173284  
Mz: 289436 Mz+1: 416726 PD: 1.6763

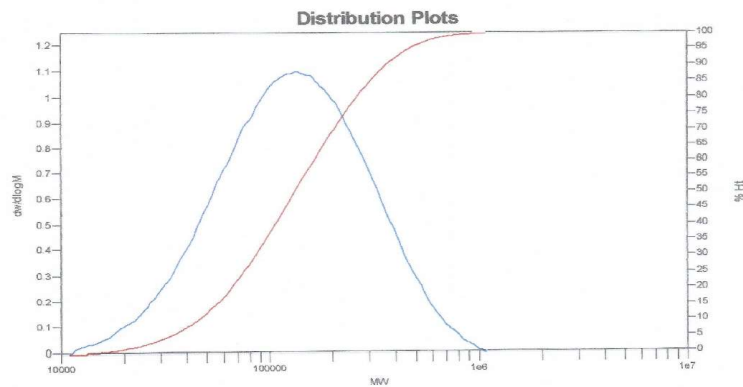

GPC spectrum of polymer in Entry 21, Table 3



**MW Averages**  
 Mp: 183956      Mn: 107131      Mv: 200768      Mw: 219540  
 Mz: 392086      Mz+1: 595976      PD: 2.0493

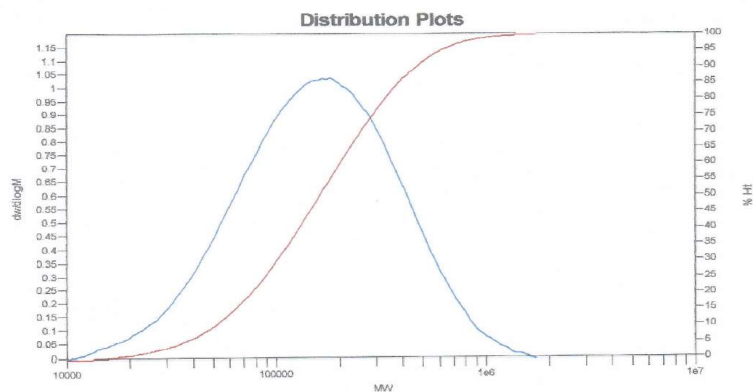

GPC spectrum of polymer in Entry 22, Table 3

**MW Averages**  
 Mp: 114839      Mn: 69345      Mv: 134243      Mw: 146572  
 Mz: 257984      Mz+1: 388627      PD: 2.1137

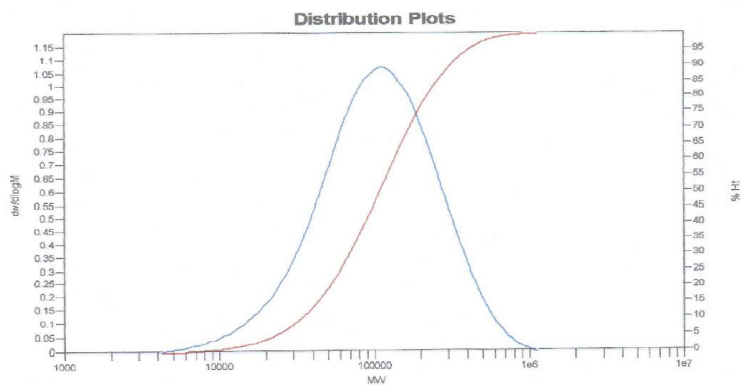

GPC spectrum of polymer in Entry 23, Table 3

**MW Averages**  
 Mp: 115472      Mn: 77175      Mv: 144494      Mw: 158004  
 Mz: 285096      Mz+1: 444344      PD: 2.0473

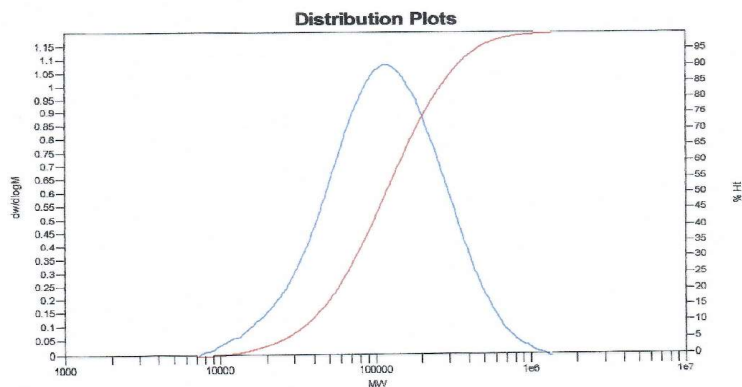

GPC spectrum of polymer in Entry 24, Table 3

**MW Averages**  
 Mp: 96956      Mn: 64902      Mv: 114917      Mw: 124454  
 Mz: 209205      Mz+1: 305893      PD: 1.9176

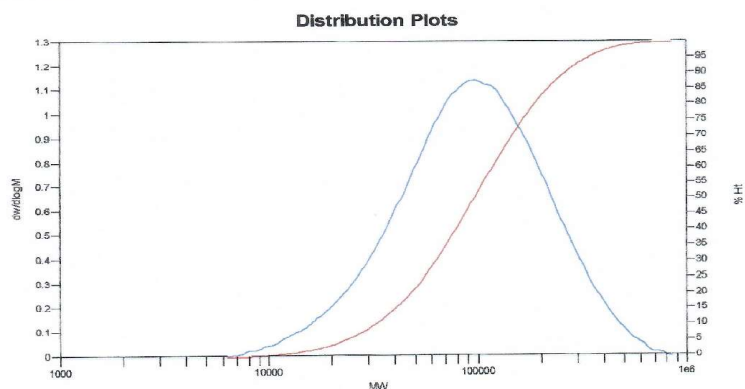

GPC spectrum of polymer in Entry 25, Table 3

**MW Averages**  
 Mp: 128800      Mn: 87534      Mv: 154793      Mw: 167998  
 Mz: 286100      Mz+1: 419850      PD: 1.9192

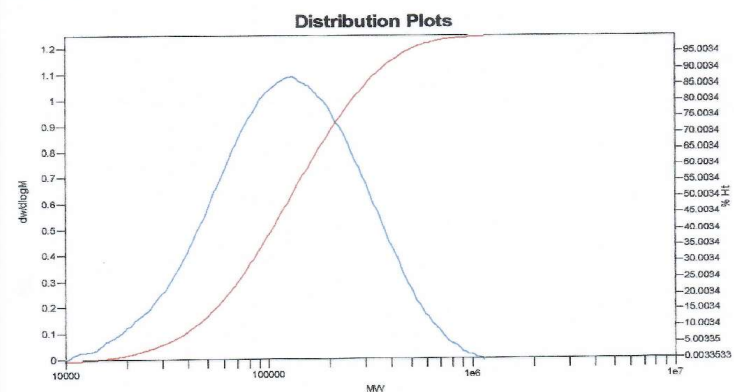

GPC spectrum of polymer in Entry 26, Table 3

**MW Averages**  
 Mp: 120629      Mn: 81211      Mv: 152333      Mw: 166507  
 Mz: 297425      Mz+1: 453232      PD: 2.0503

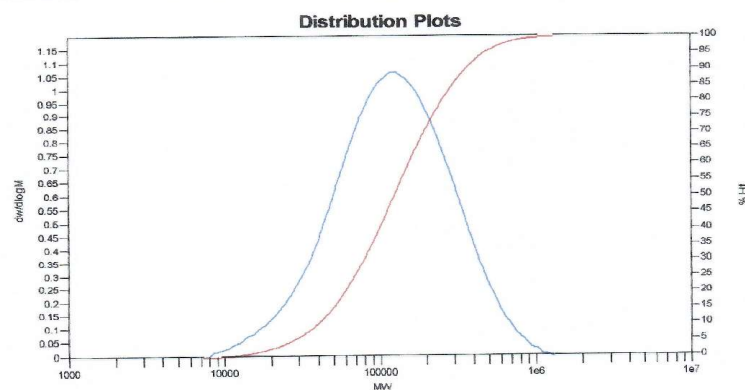

GPC spectrum of polymer in Entry 27, Table 3

**MW Averages**  
Mp: 110535      Mn: 76161      Mv: 136108      Mw: 147683  
Mz: 251338      Mz+1: 370557      PD: 1.9391

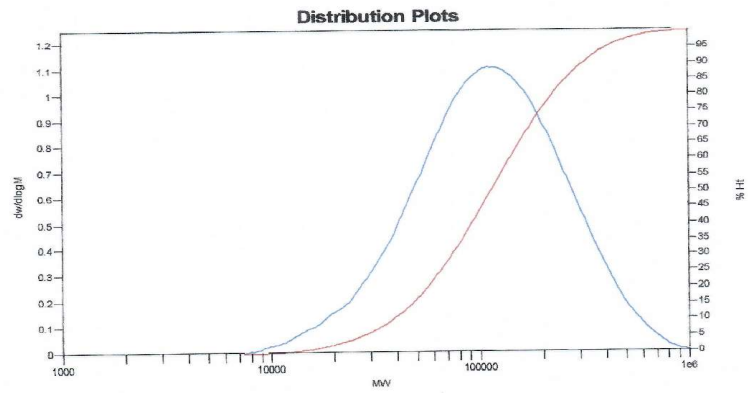

**MW Averages**  
Mp: 150083      Mn: 81491      Mv: 160854      Mw: 175893  
Mz: 308700      Mz+1: 453731      PD: 2.1584

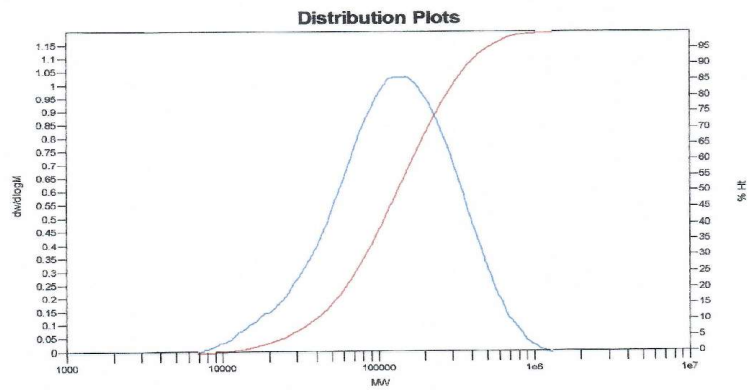

# DSC spectra of polymers

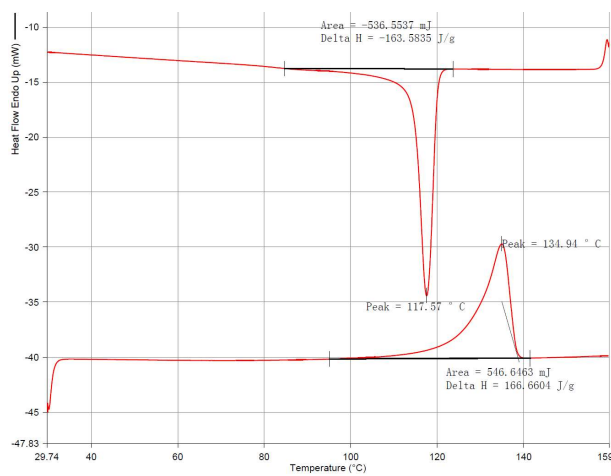

DSC spectrum of PE in Entry 1, Table 1

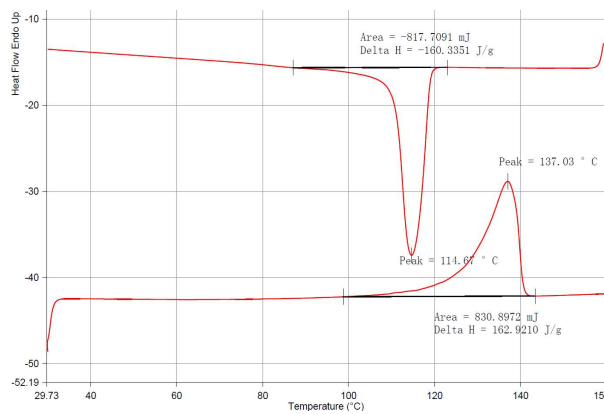

DSC spectrum of PE in Entry 2, Table 1

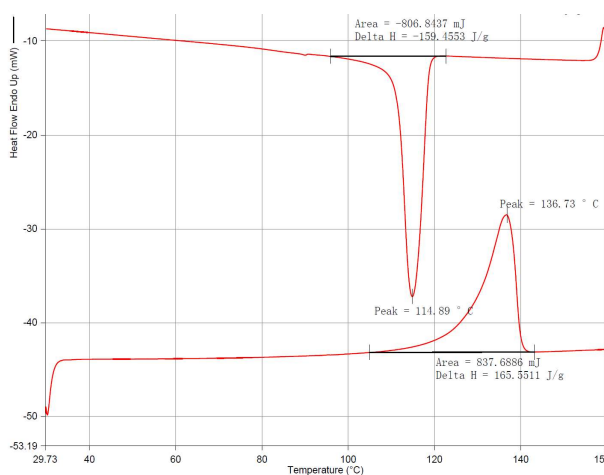

DSC spectrum of PE in Entry 3, Table 1

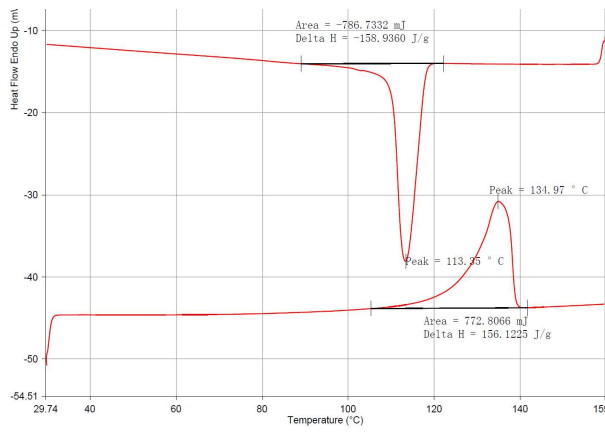

GPC spectrum of PE in Entry4, Table 1

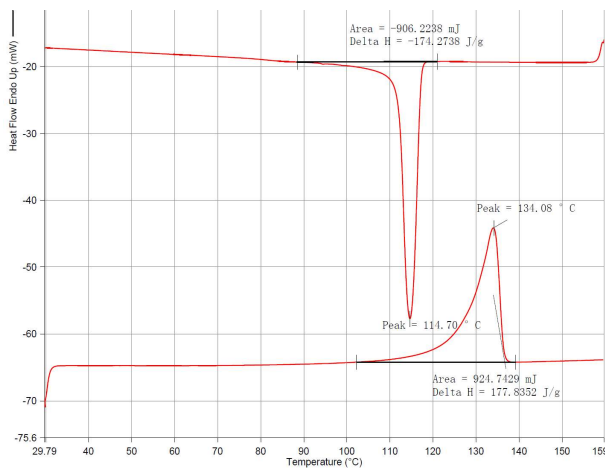

DSC spectrum of PE in Entry 5, Table 1

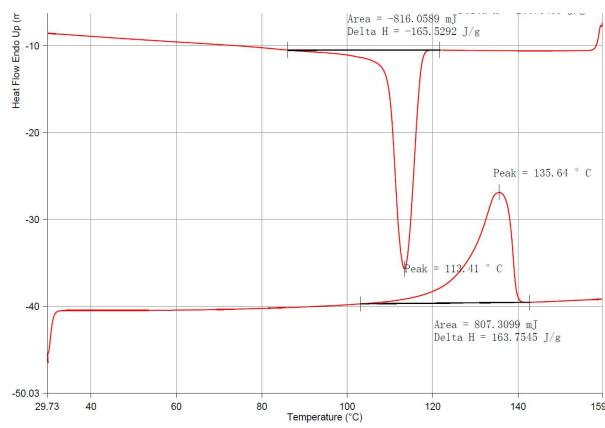

DSC spectrum of PE in Entry 6, Table 1

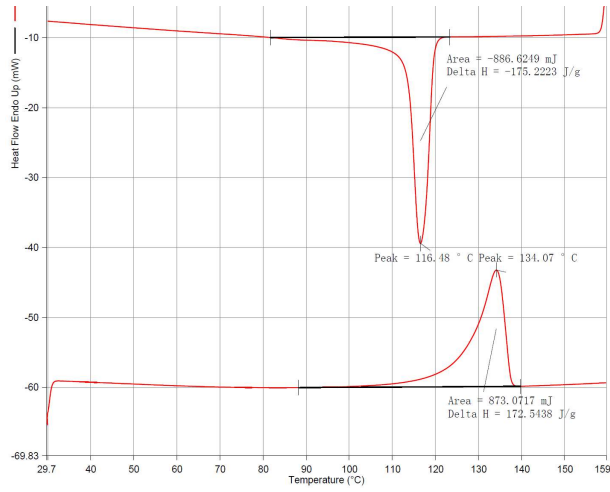

DSC spectrum of PE in Entry 7, Table 1

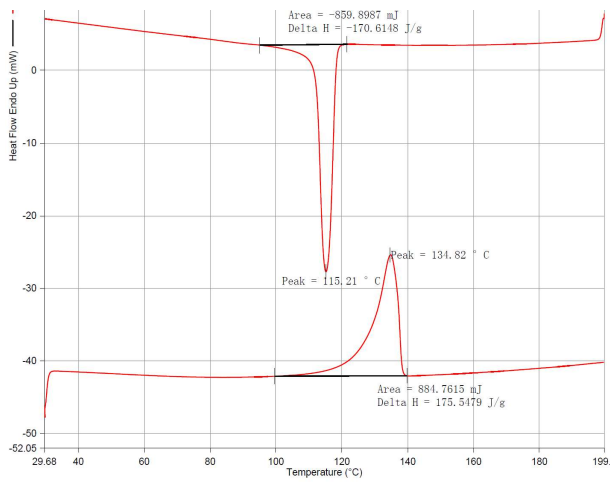

DSC spectrum of PE in Entry 8, Table 1

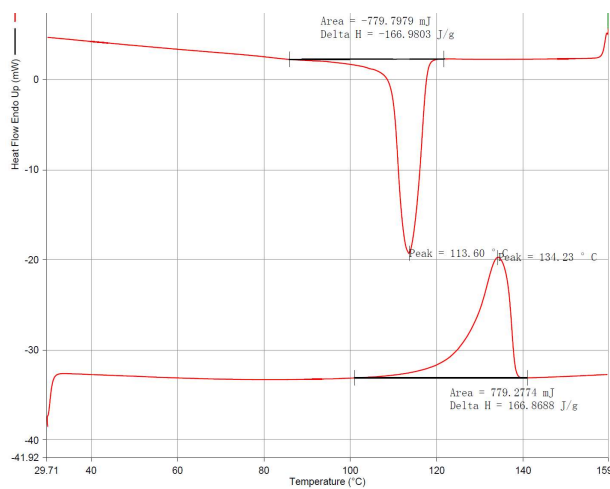

DSC spectrum of PE in Entry 9, Table 1

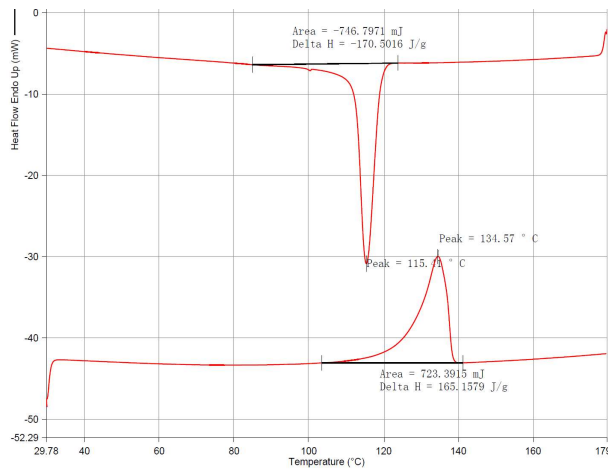

DSC spectrum of PE in Entry 10, Table 1

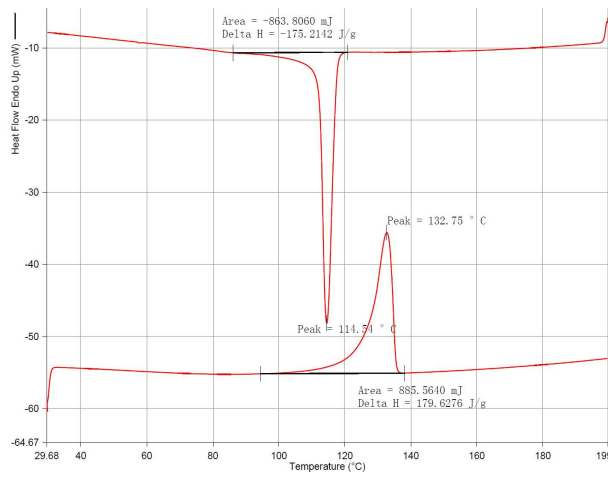

DSC spectrum of PE in Entry 11, Table 1

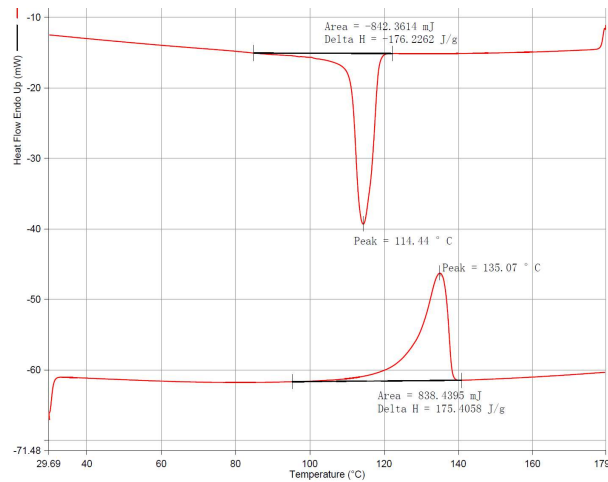

DSC spectrum of PE in Entry 12, Table 1

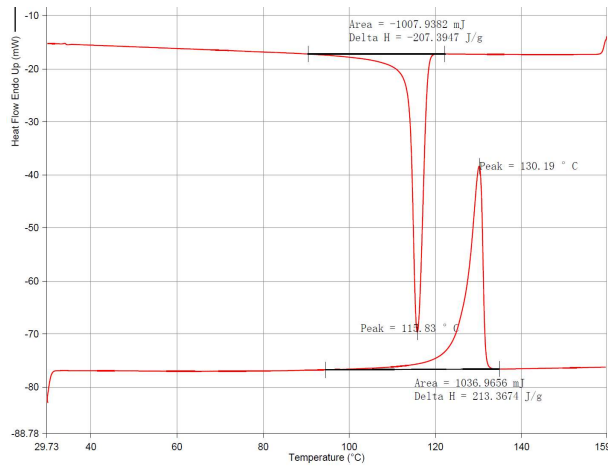

DSC spectrum of PE in Entry 13, Table 1

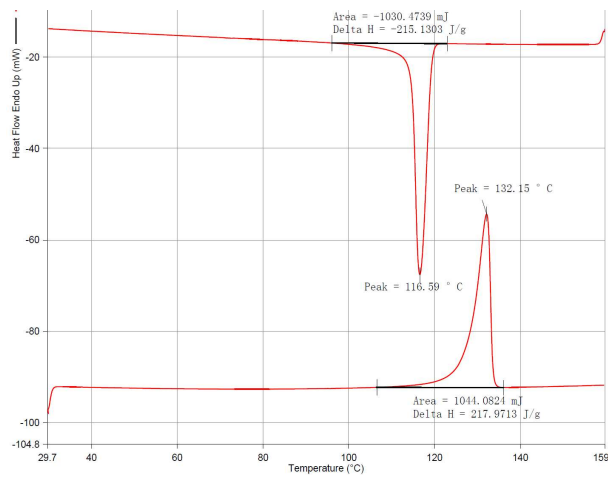

DSC spectrum of PE in Entry 14, Table 1

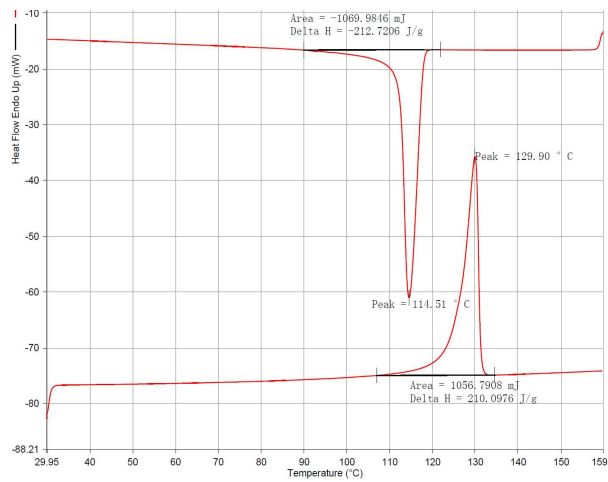

DSC spectrum of PE in Entry 15, Table 1



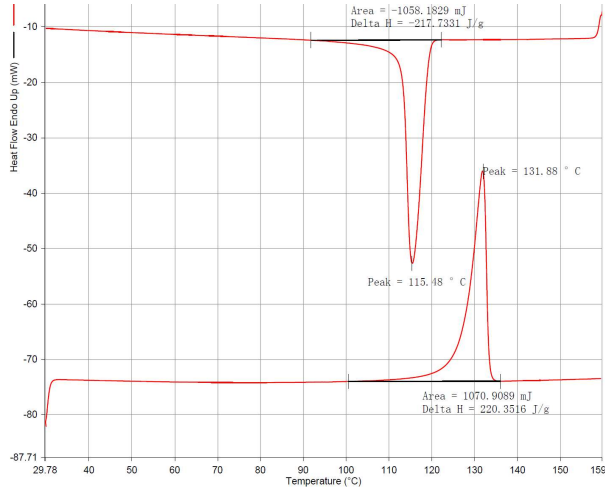

DSC spectrum of PE in Entry 16, Table 1

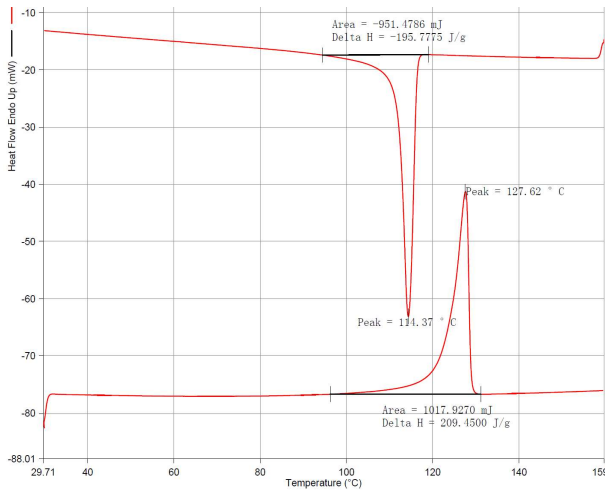

DSC spectrum of PE in Entry 17, Table 1

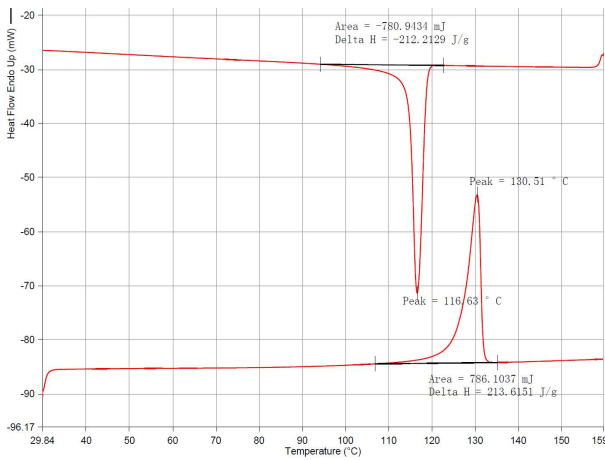

DSC spectrum of PE in Entry 18, Table 1

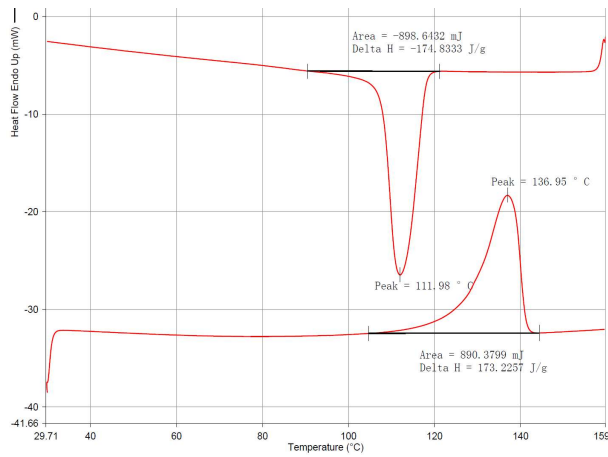

DSC spectrum of PE in Entry 19, Table 1

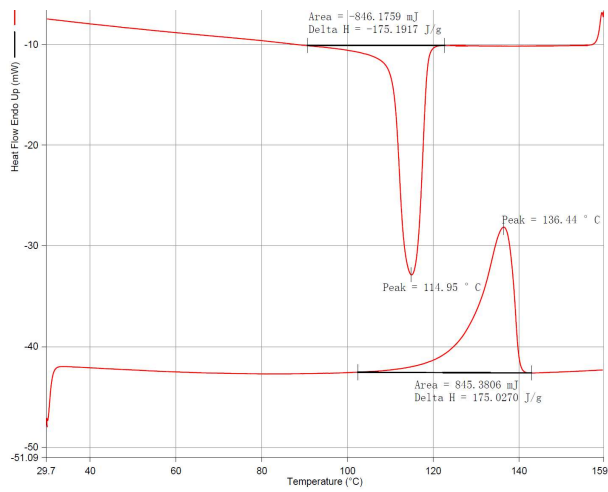

DSC spectrum of PE in Entry 20, Table 1

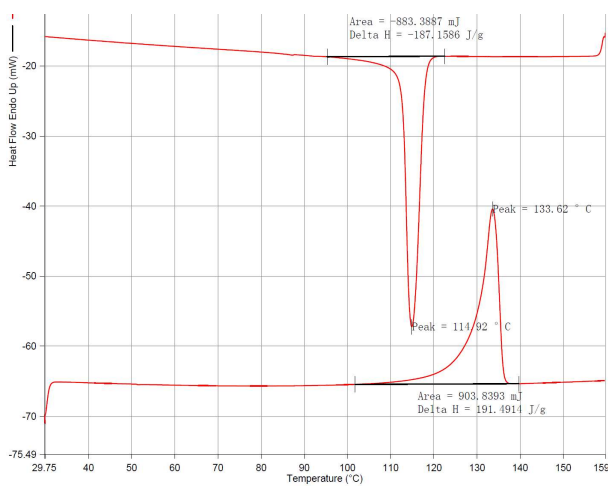

DSC spectrum of PE in Entry 21, Table 1

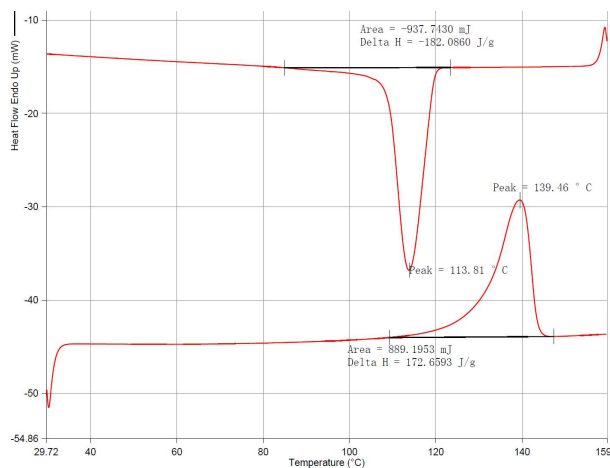

DSC spectrum of PE in Entry 22, Table 1

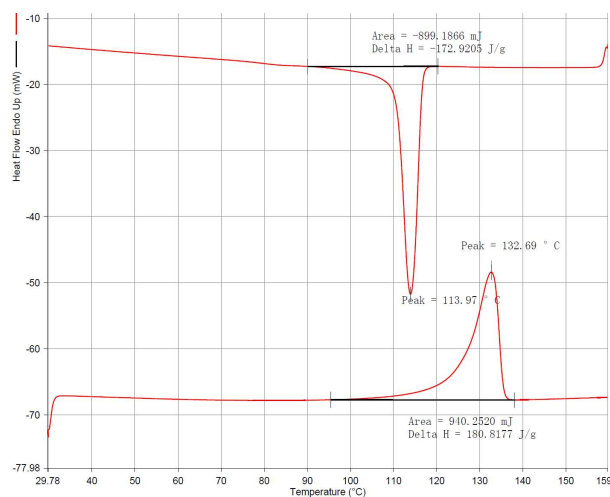

DSC spectrum of PE in Entry 23, Table 1

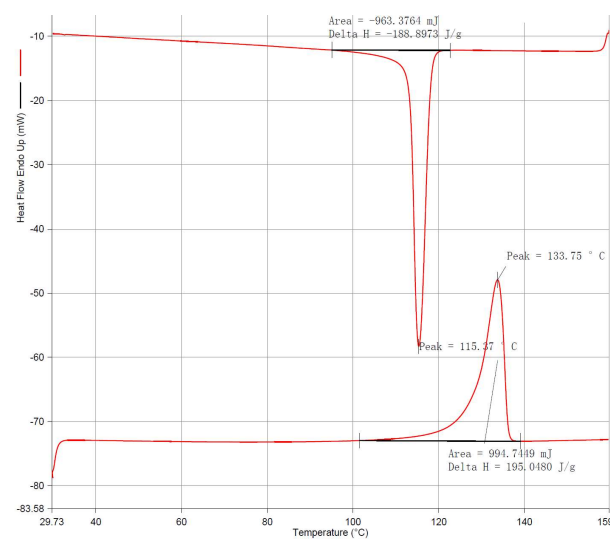

DSC spectrum of PE in Entry 24, Table 1

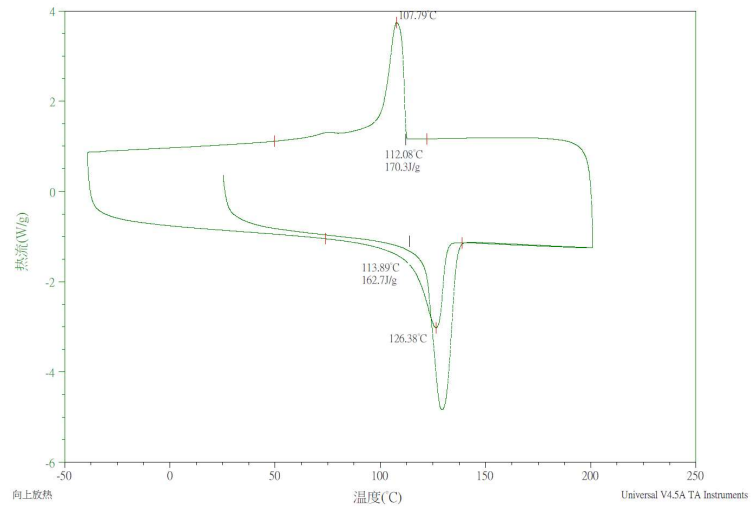

DSC spectrum of polymer in Entry 1, Table 2

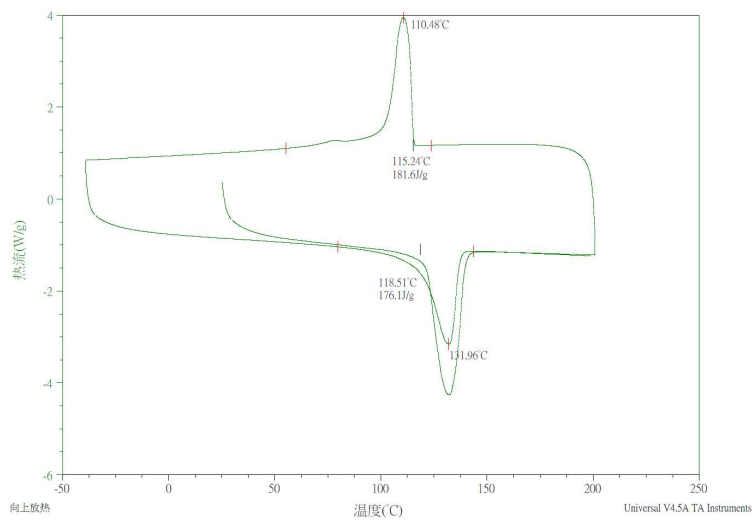

DSC spectrum of polymer in Entry 2, Table 2

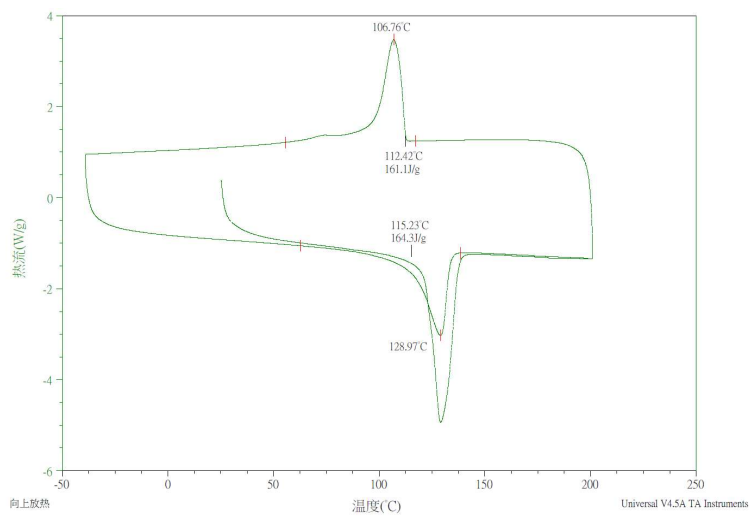

DSC spectrum of polymer in Entry 3, Table 2

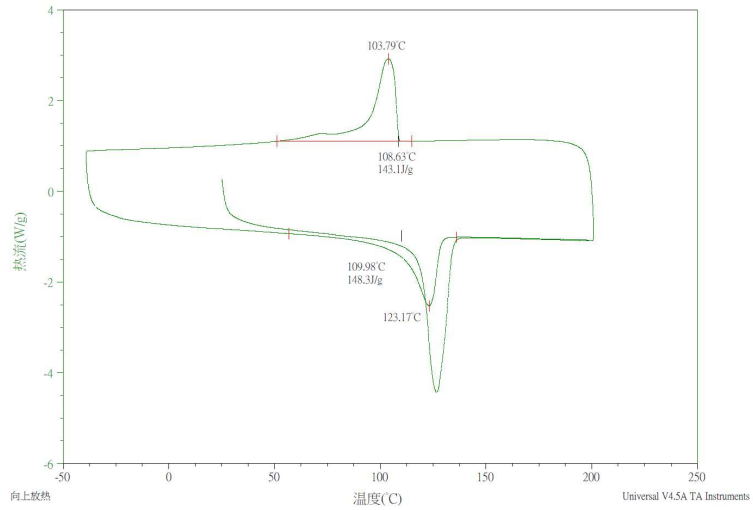

DSC spectrum of polymer in Entry 4, Table 2

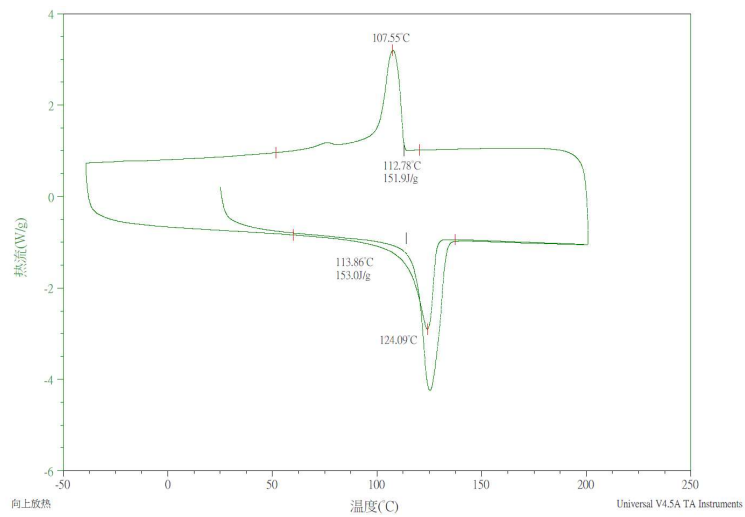

DSC spectrum of polymer in Entry 5, Table 2

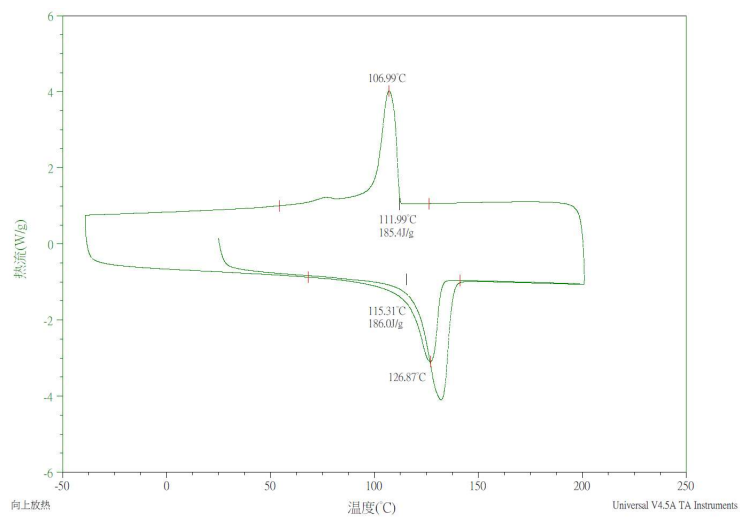

DSC spectrum of polymer in Entry 6, Table 2

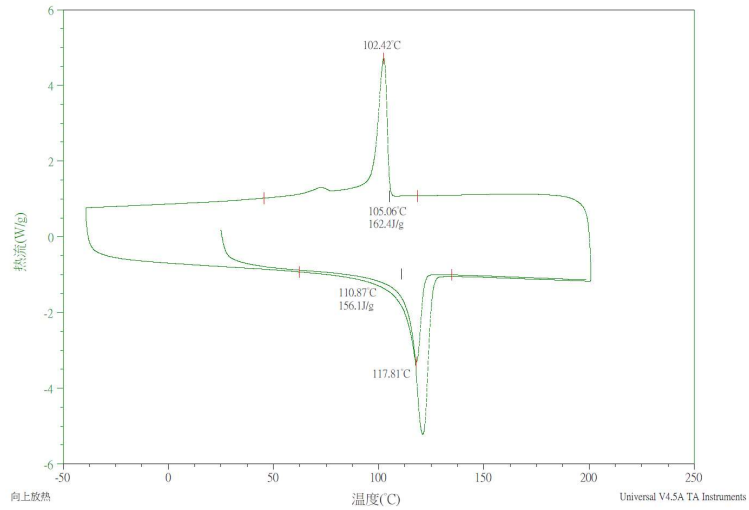

DSC spectrum of polymer in Entry 7, Table 2

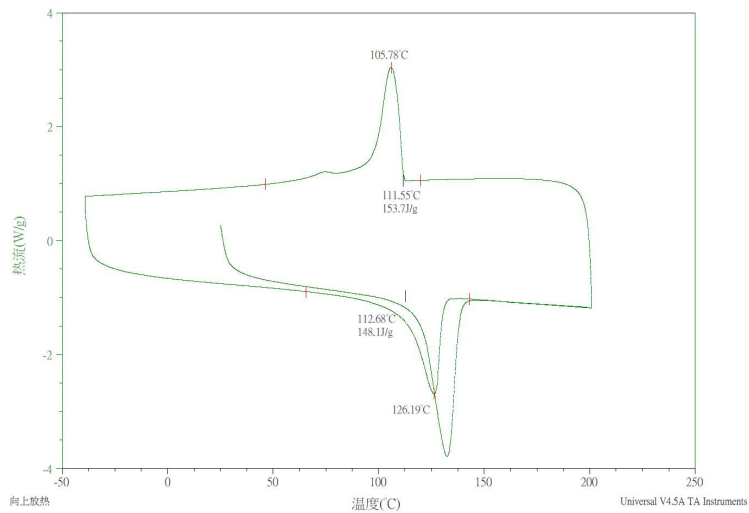

DSC spectrum of polymer in Entry 8, Table 2

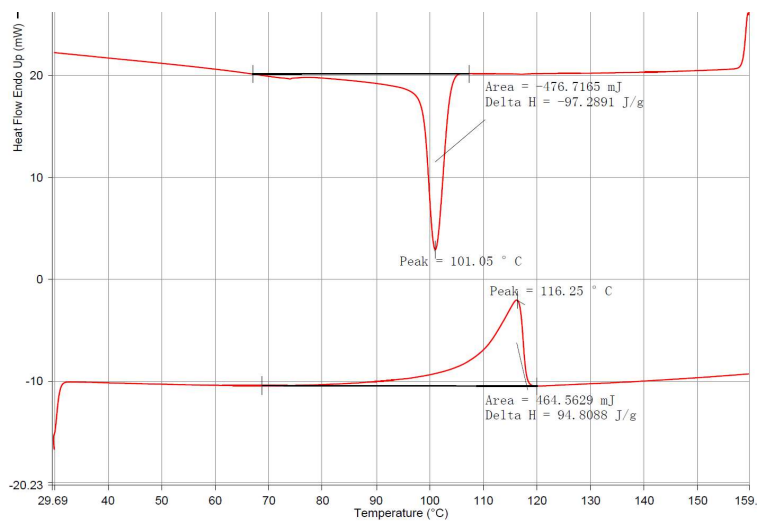

DSC spectrum of polymer in Entry 10, Table 2

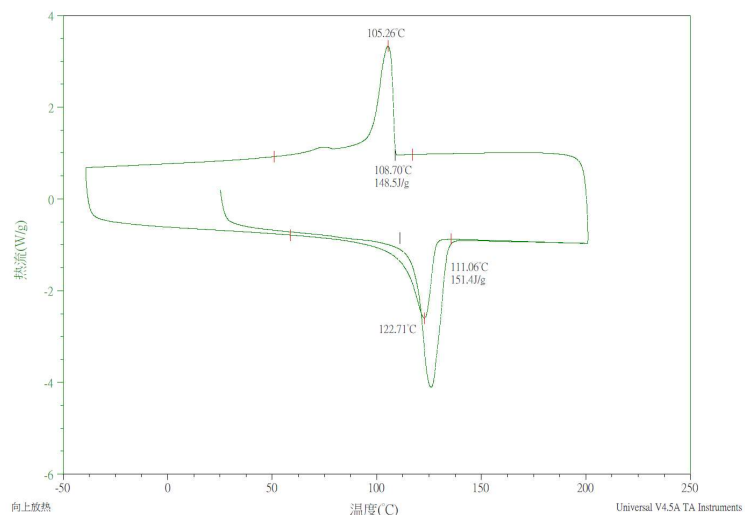

DSC spectrum of polymer in Entry 11, Table 2

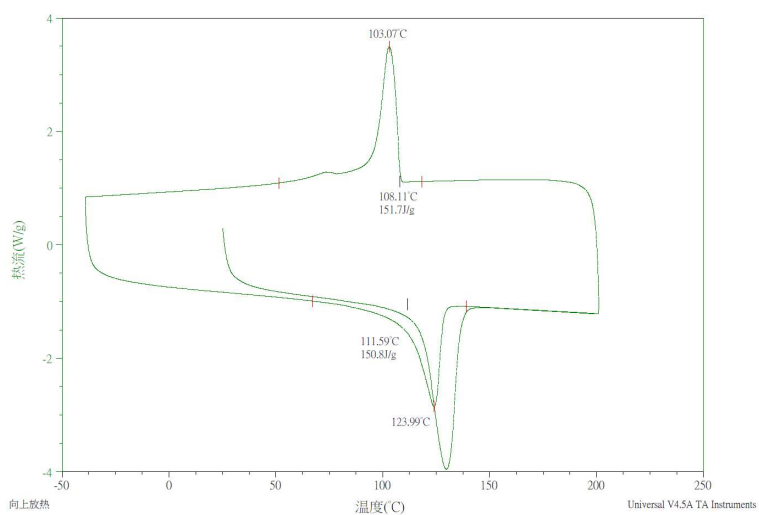

DSC spectrum of polymer in Entry 12, Table 2

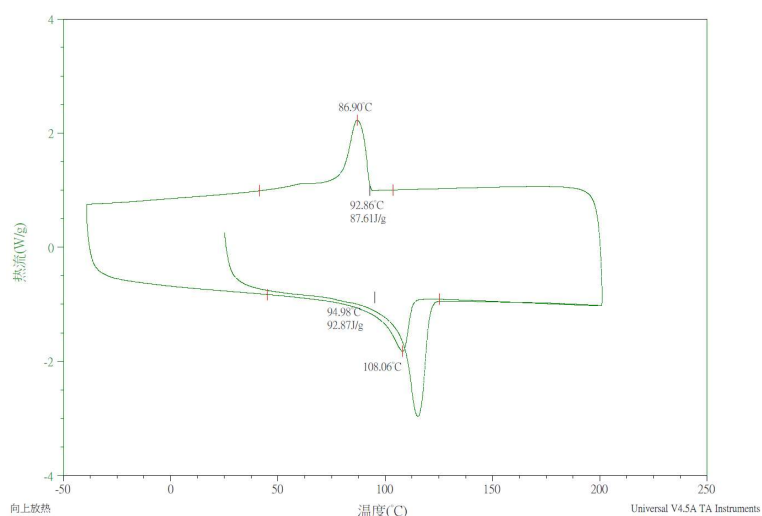

DSC spectrum of polymer in Entry 13, Table 2

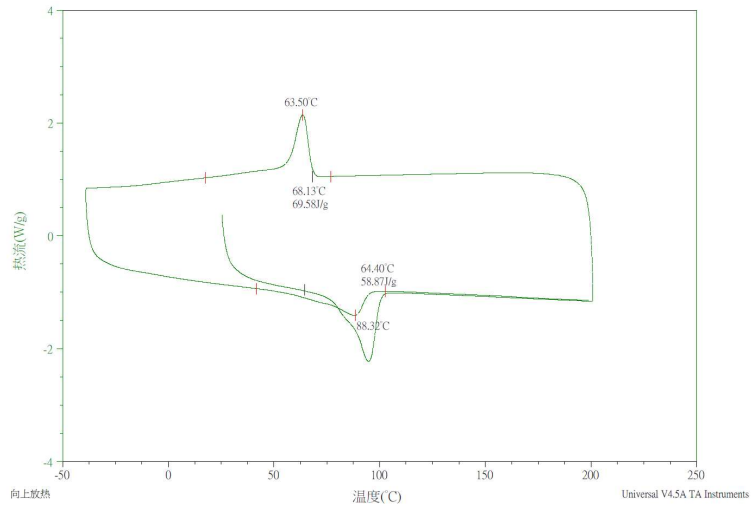

DSC spectrum of polymer in Entry 14, Table 2

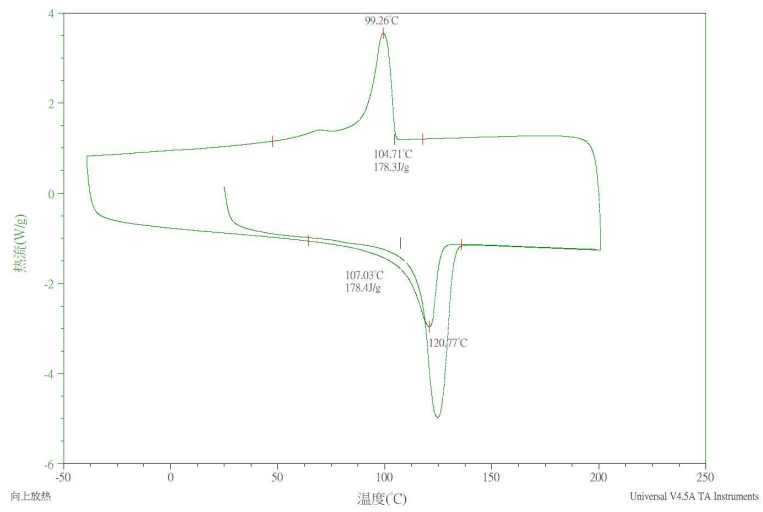

DSC spectrum of polymer in Entry 15, Table 2

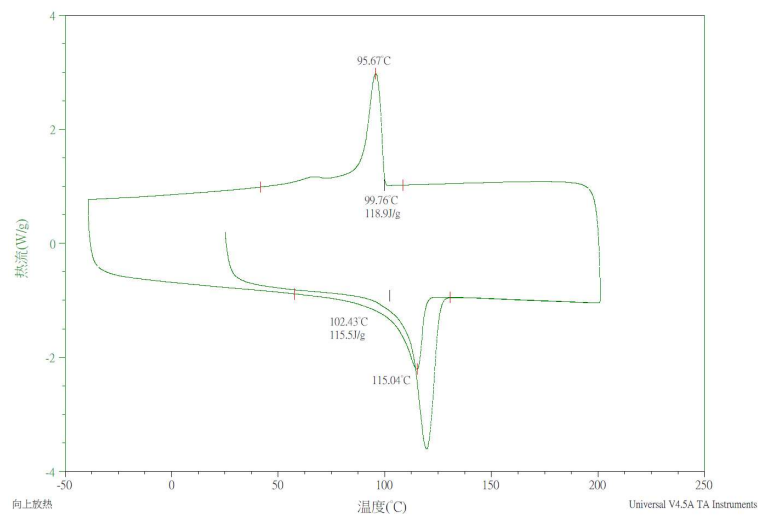

DSC spectrum of polymer in Entry 16, Table 2



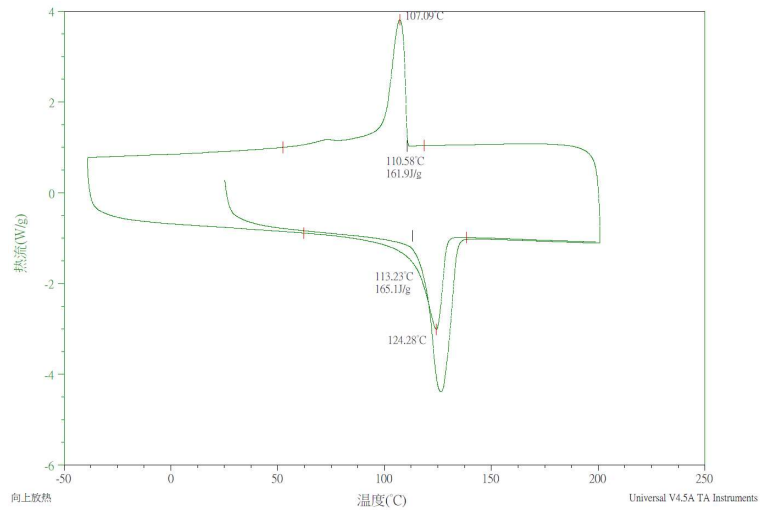

DSC spectrum of polymer in Entry 17, Table 2

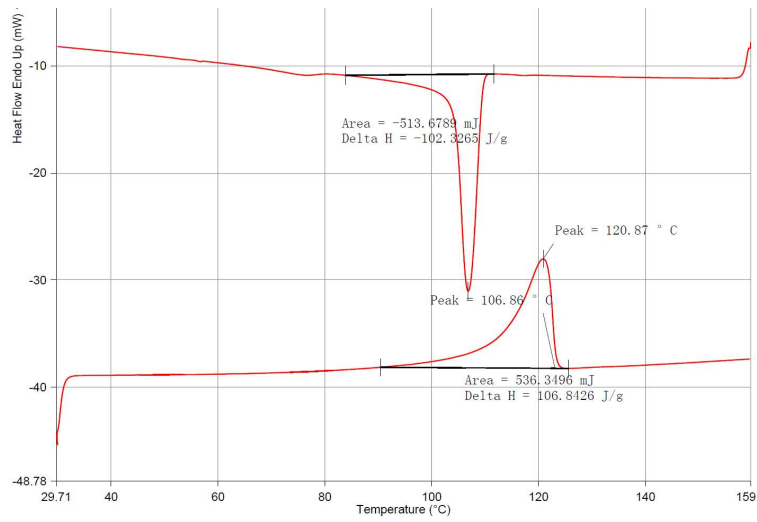

DSC spectrum of polymer in Entry 18, Table 2

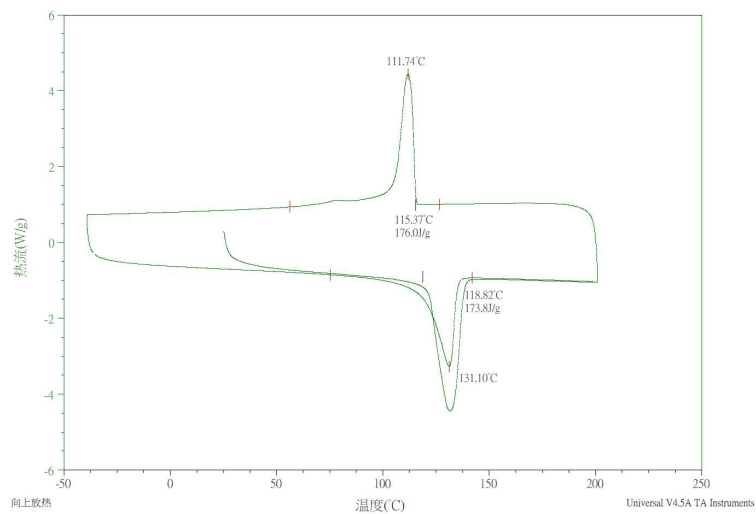

DSC spectrum of polymer in Entry 19, Table 2

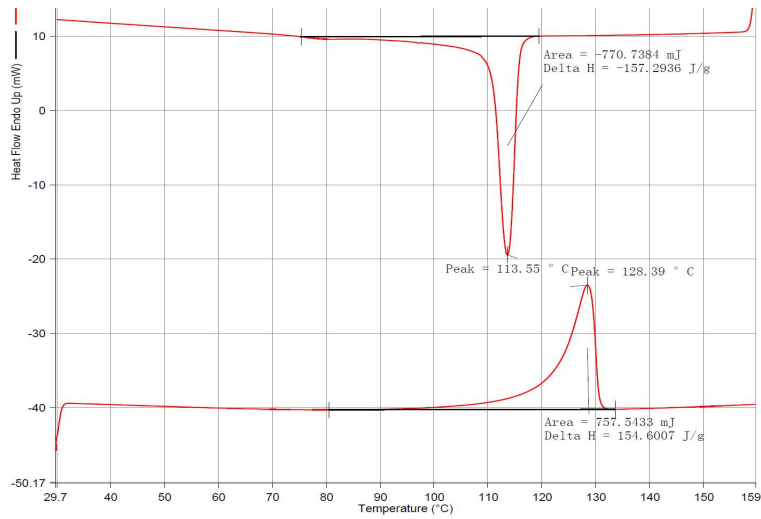

DSC spectrum of polymer in Entry 20, Table 2

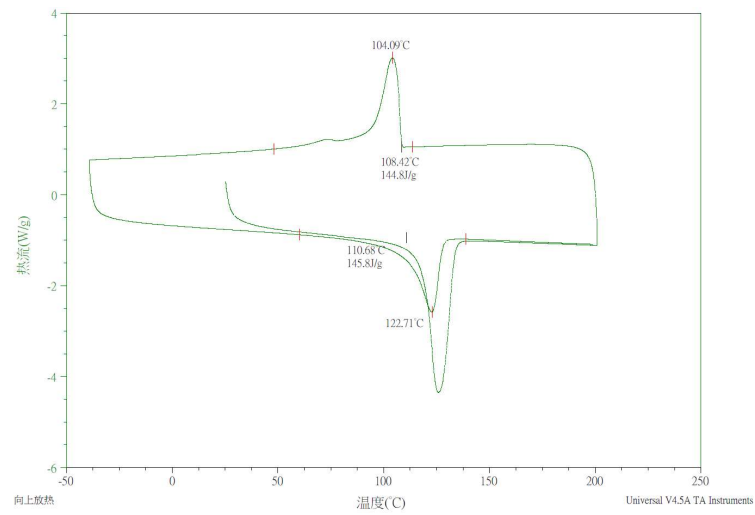

DSC spectrum of polymer in Entry 1, Table 3

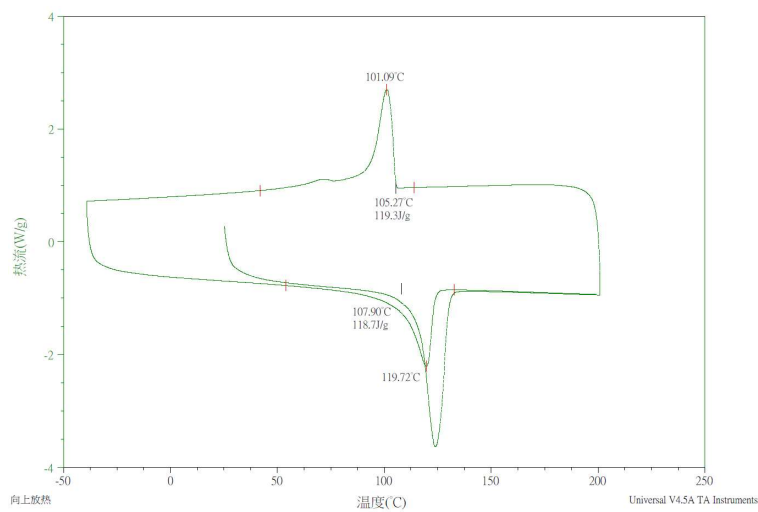

DSC spectrum of polymer in Entry 2, Table 3

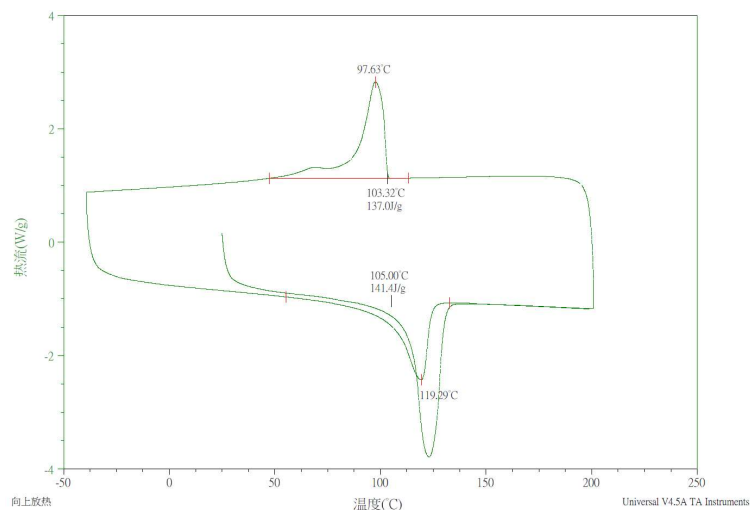

DSC spectrum of polymer in Entry 3, Table 3

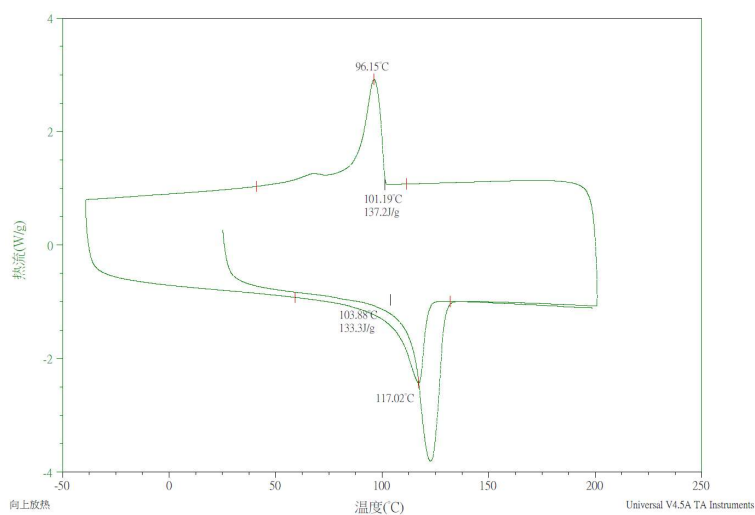

DSC spectrum of polymer in Entry 4, Table 3

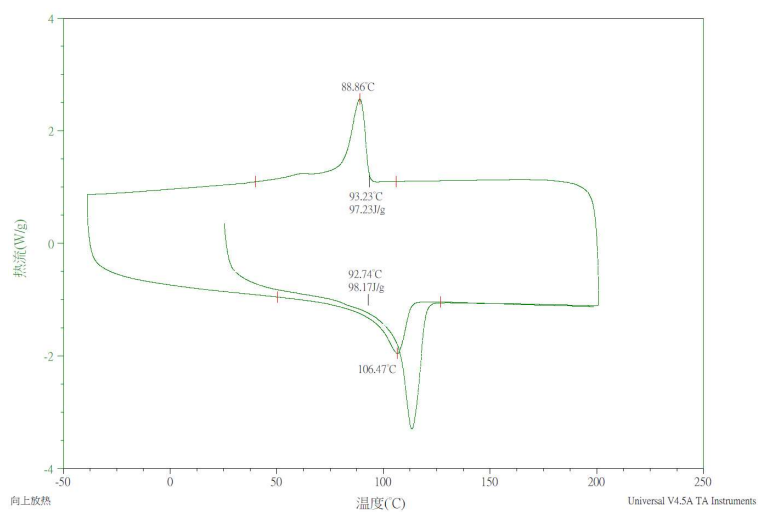

DSC spectrum of polymer in Entry 5, Table 3

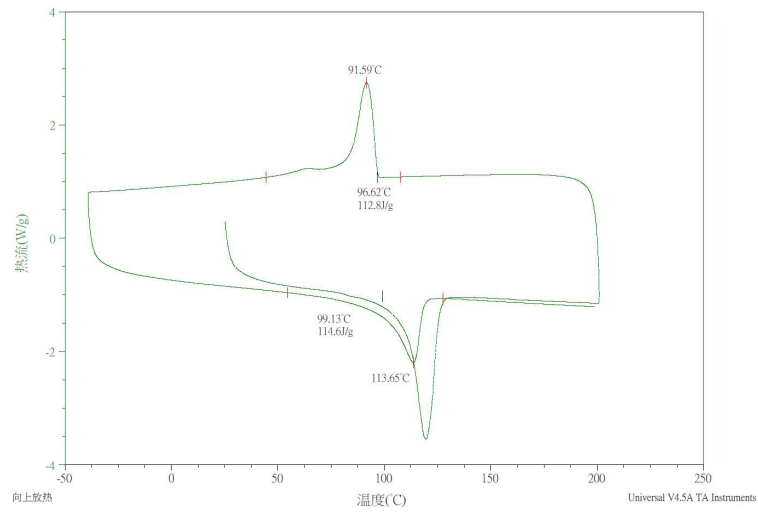

DSC spectrum of polymer in Entry 6, Table 3

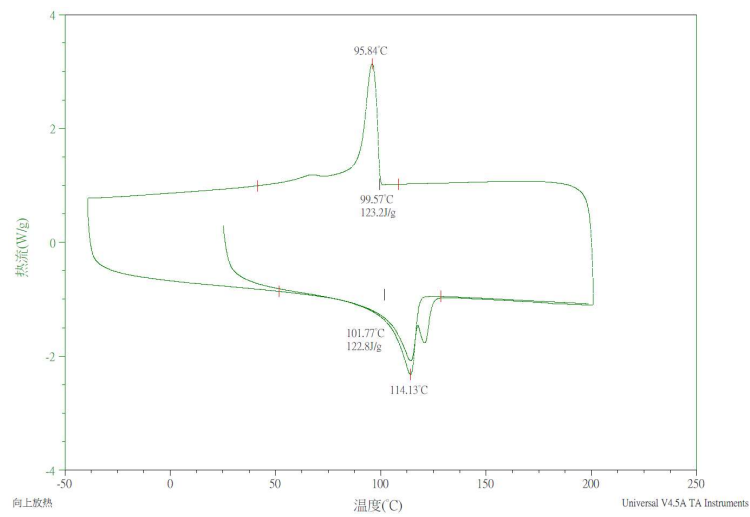

DSC spectrum of polymer in Entry 7, Table 3

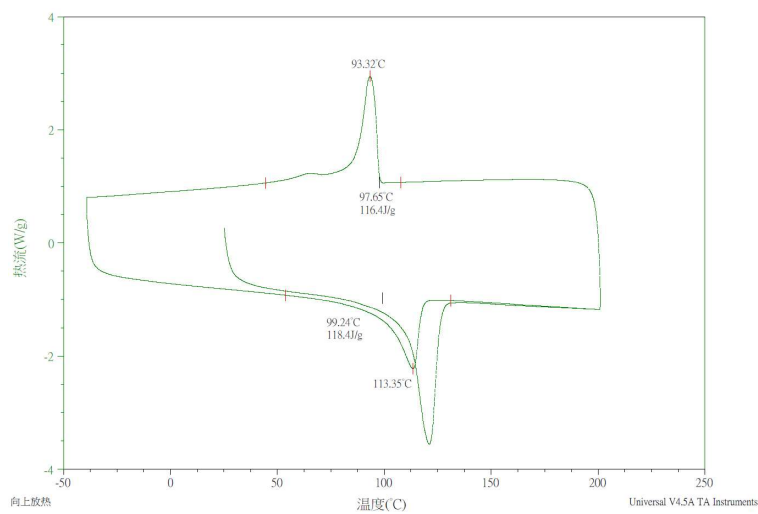

DSC spectrum of polymer in Entry 8, Table 3

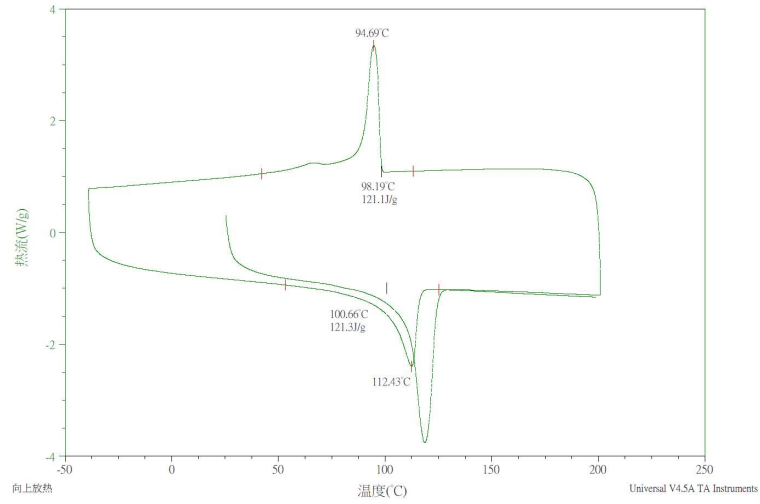

DSC spectrum of polymer in Entry 9, Table 3

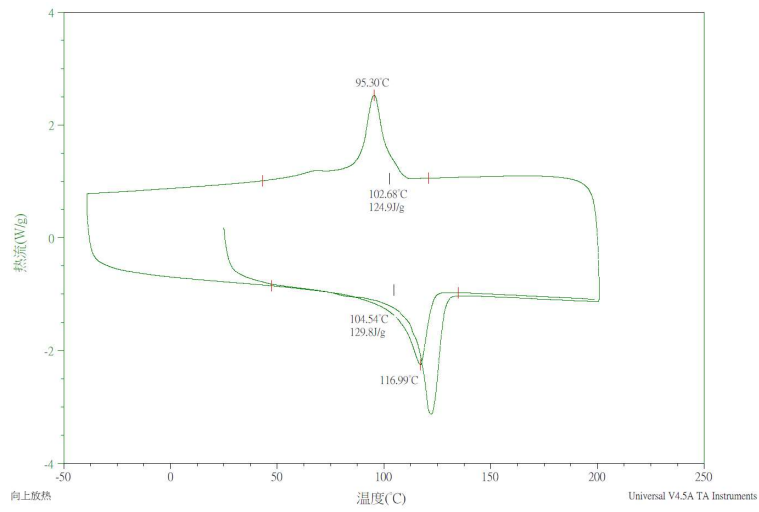

DSC spectrum of polymer in Entry 10, Table 3

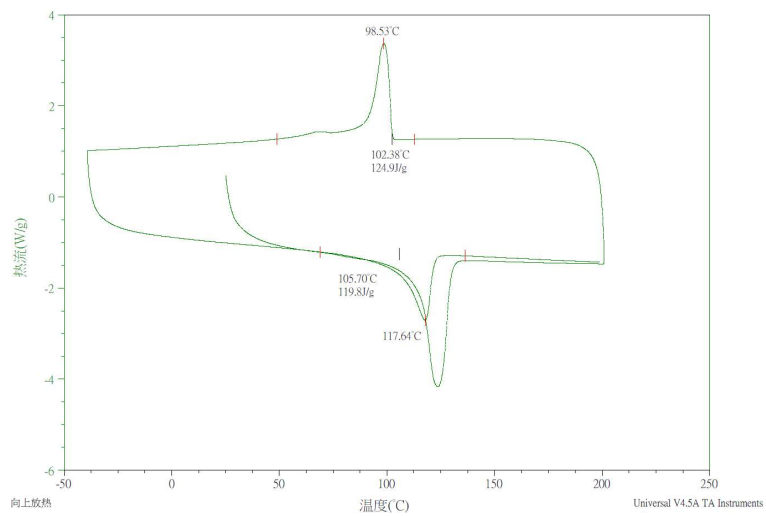

DSC spectrum of polymer in Entry 11, Table 3

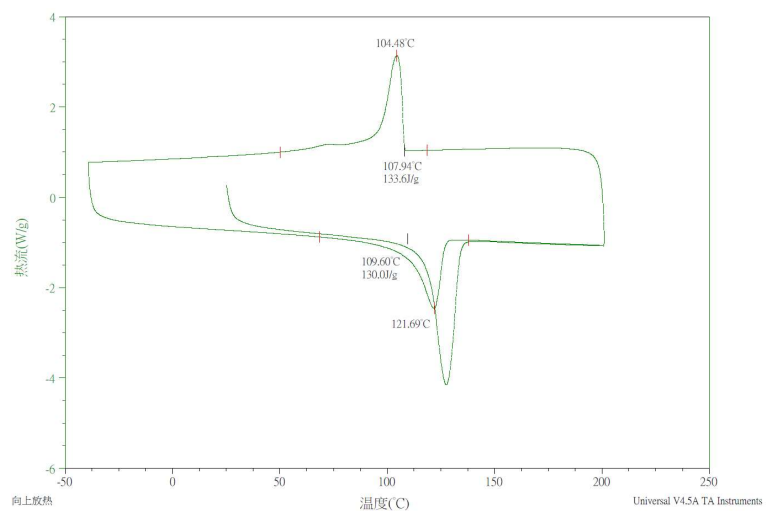

DSC spectrum of polymer in Entry 12, Table 3

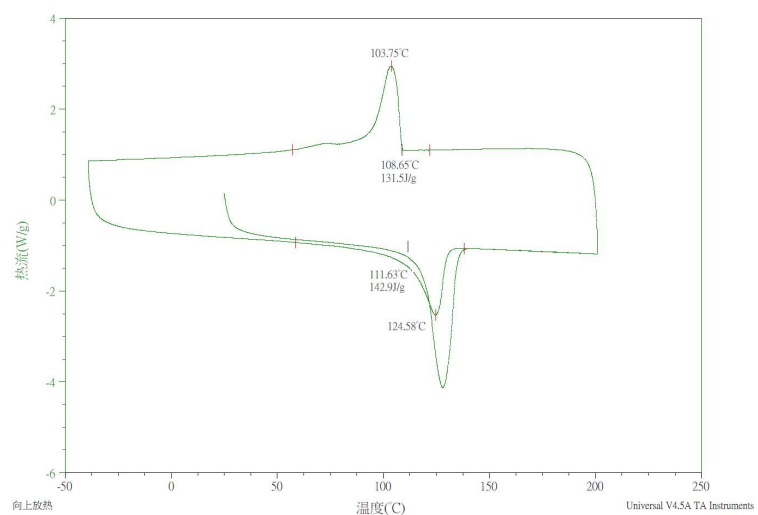

DSC spectrum of polymer in Entry 13, Table 3

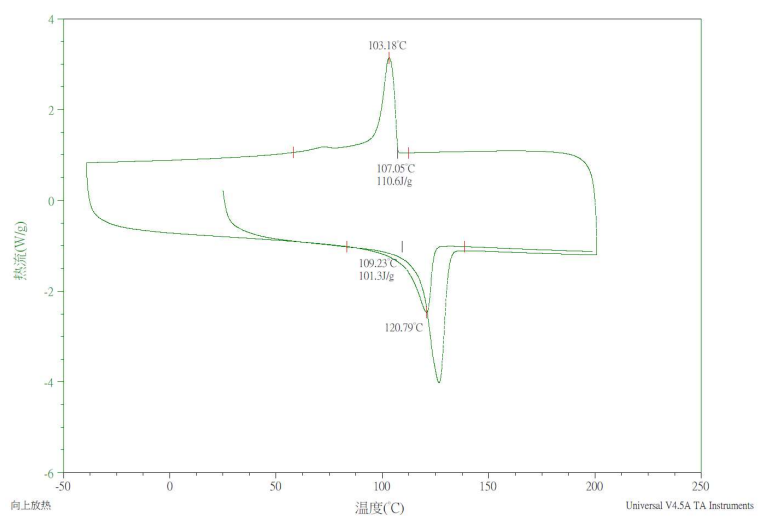

DSC spectrum of polymer in Entry 14, Table 3

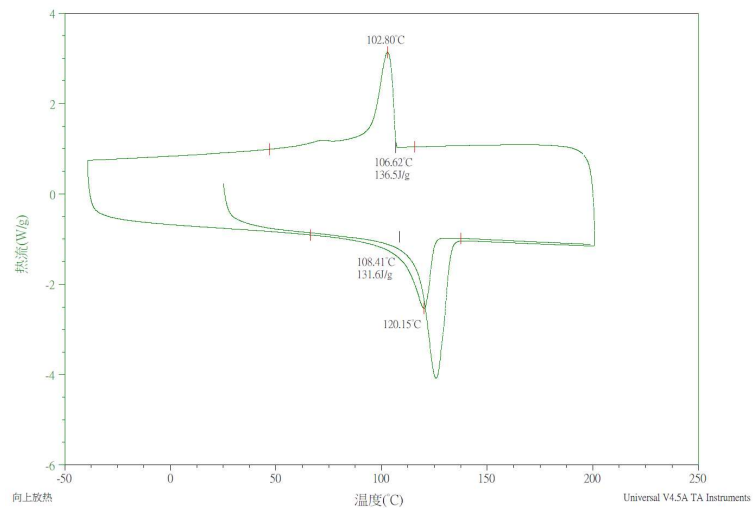

DSC spectrum of polymer in Entry 15, Table 3

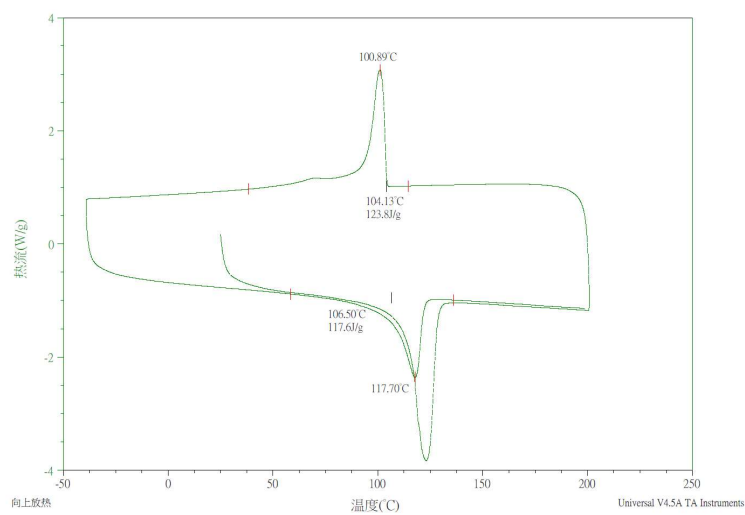

DSC spectrum of polymer in Entry 16, Table 3

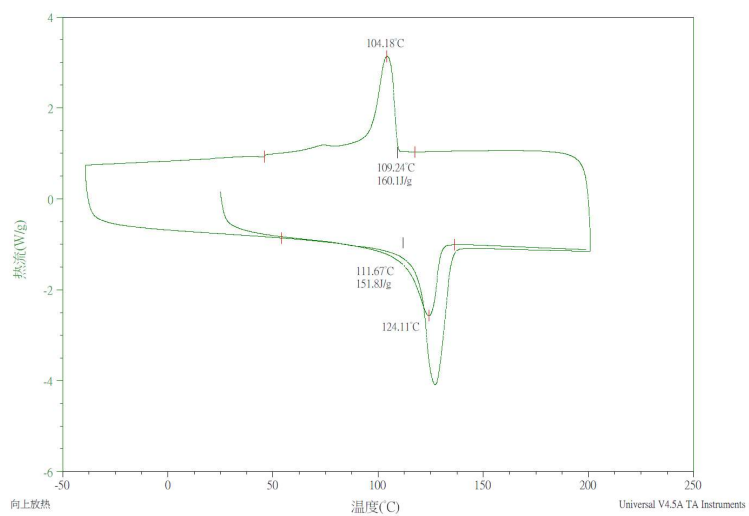

DSC spectrum of polymer in Entry 17, Table 3

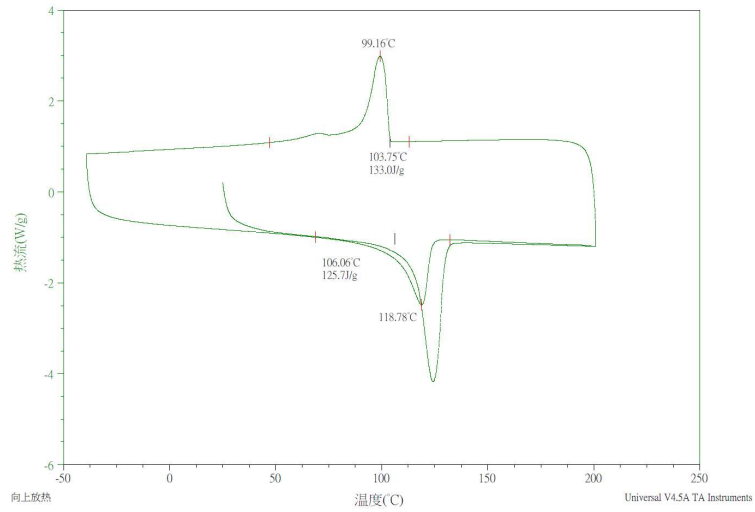

DSC spectrum of polymer in Entry 18, Table 3

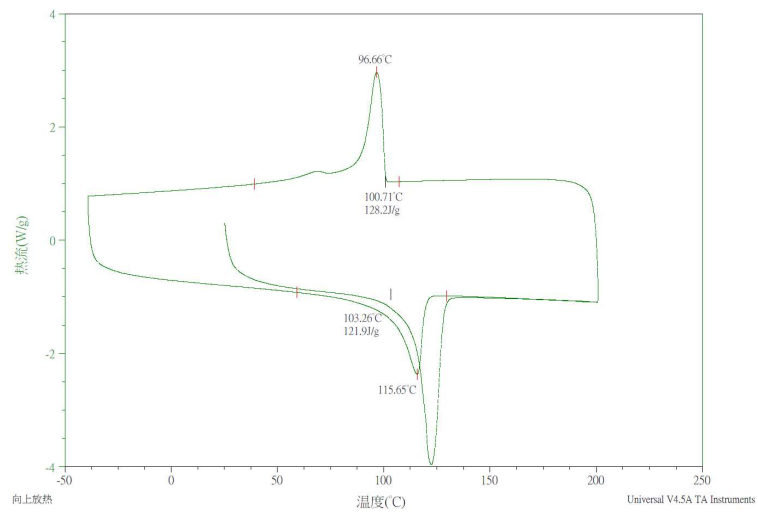

DSC spectrum of polymer in Entry 19, Table 3

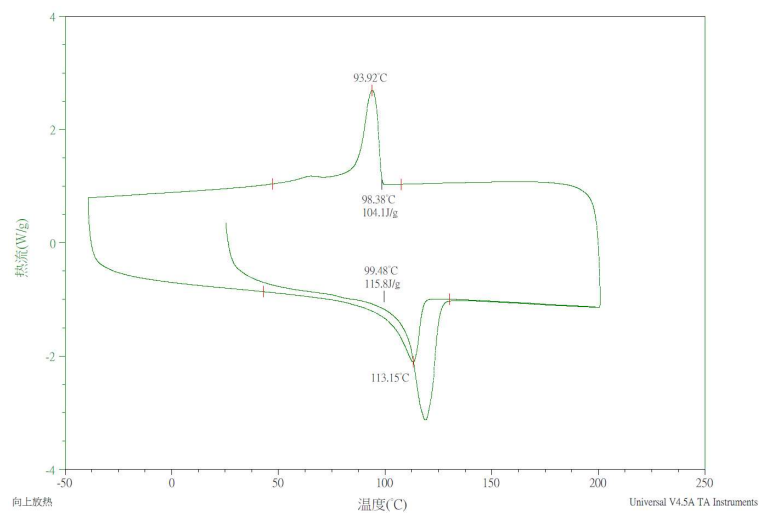

DSC spectrum of polymer in Entry 20, Table 3



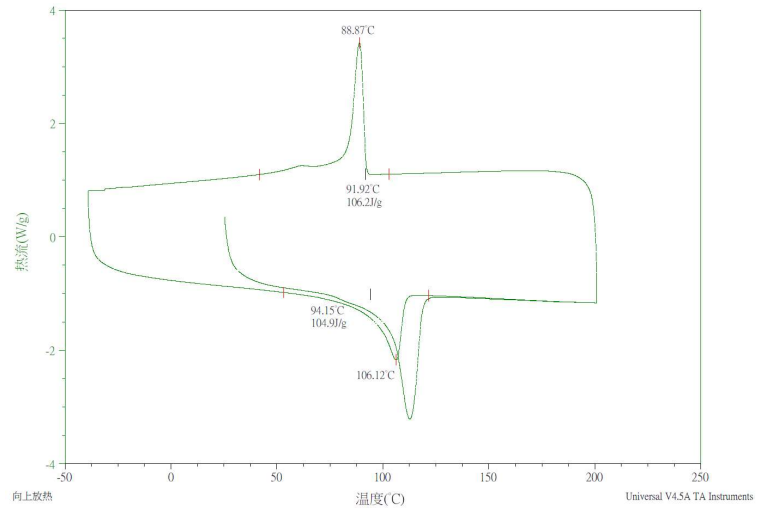

DSC spectrum of polymer in Entry 21, Table 3

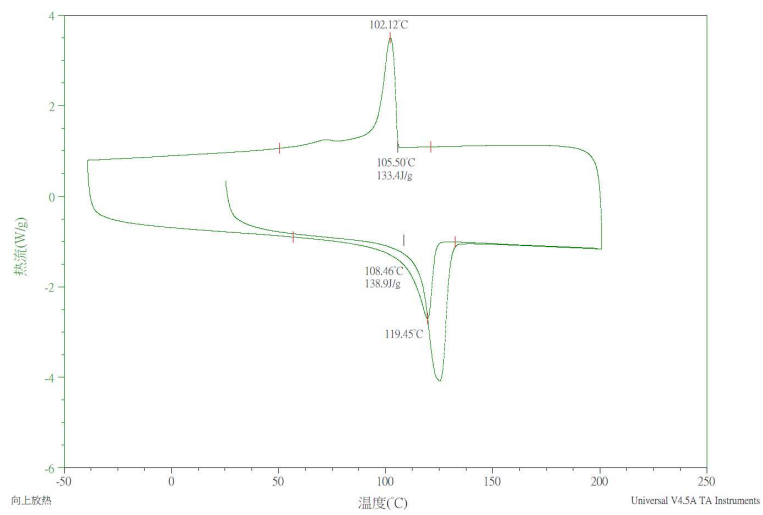

DSC spectrum of polymer in Entry 22, Table 3

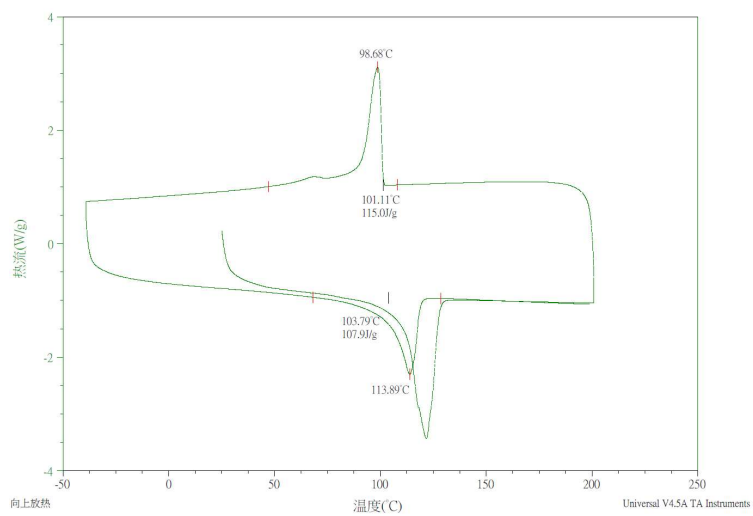

DSC spectrum of polymer in Entry 23, Table 3

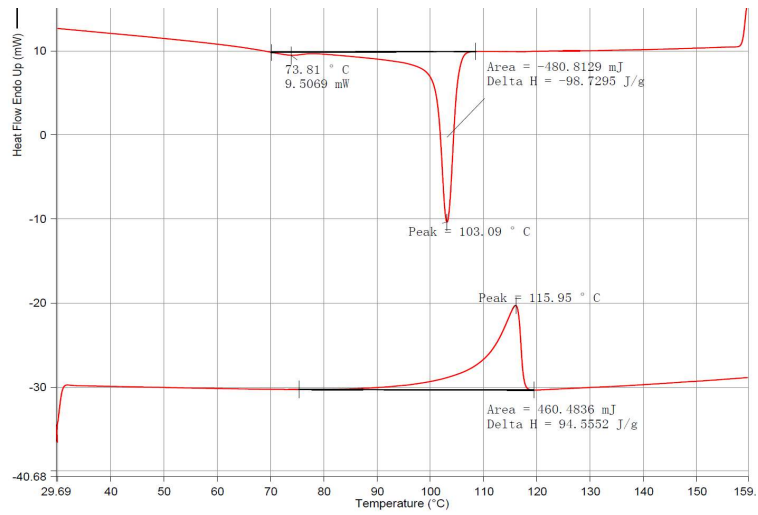

DSC spectrum of polymer in Entry 24, Table 3

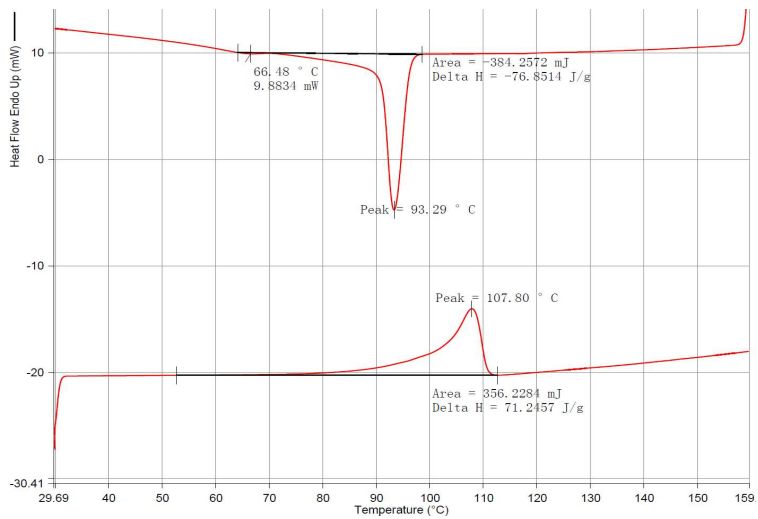

DSC spectrum of polymer in Entry 25, Table 3

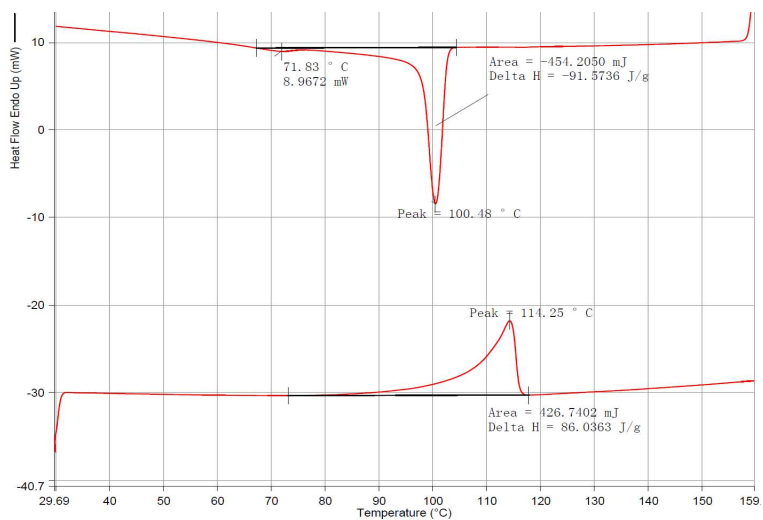

DSC spectrum of polymer in Entry 26, Table 3

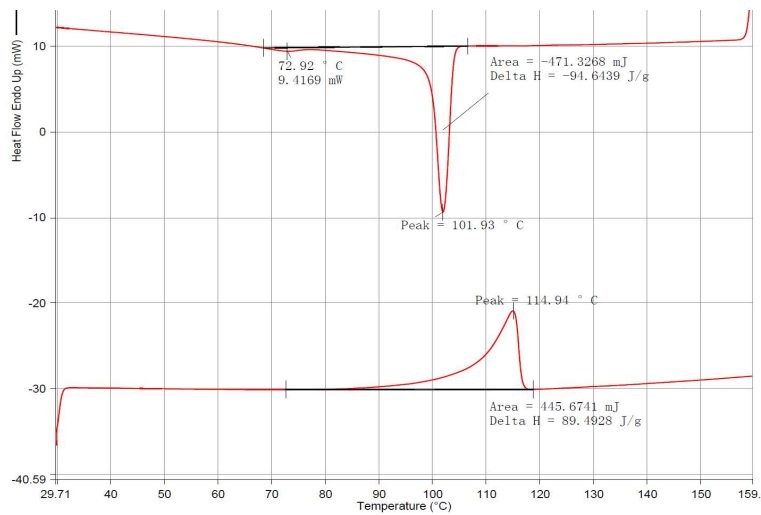

DSC spectrum of polymer in Entry 27, Table 3

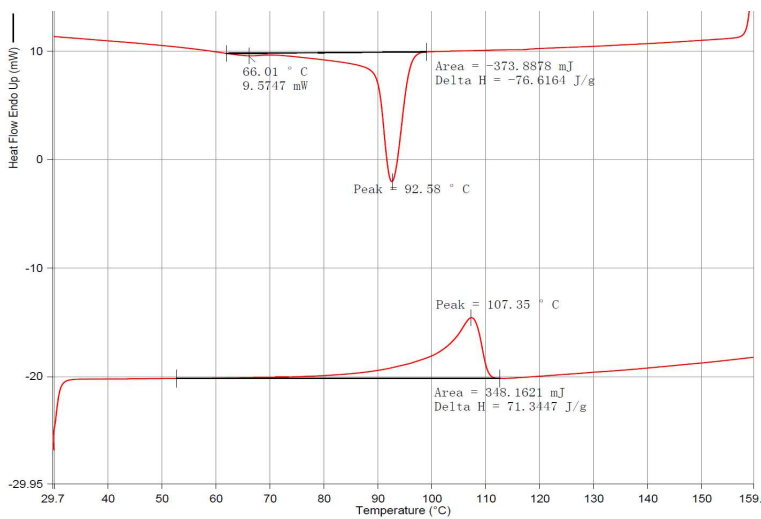

DSC spectrum of polymer in Entry 28, Table 3

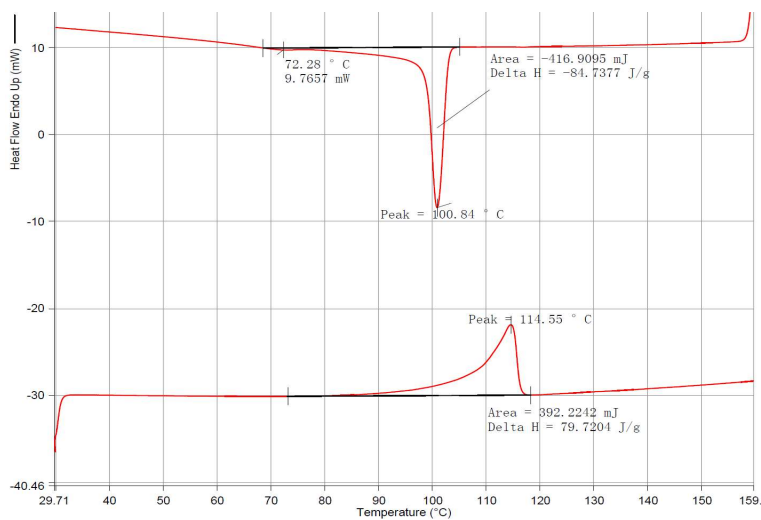

DSC spectrum of polymer in Entry 29, Table 3

# WCAs of polymers

E-Entry T-Table

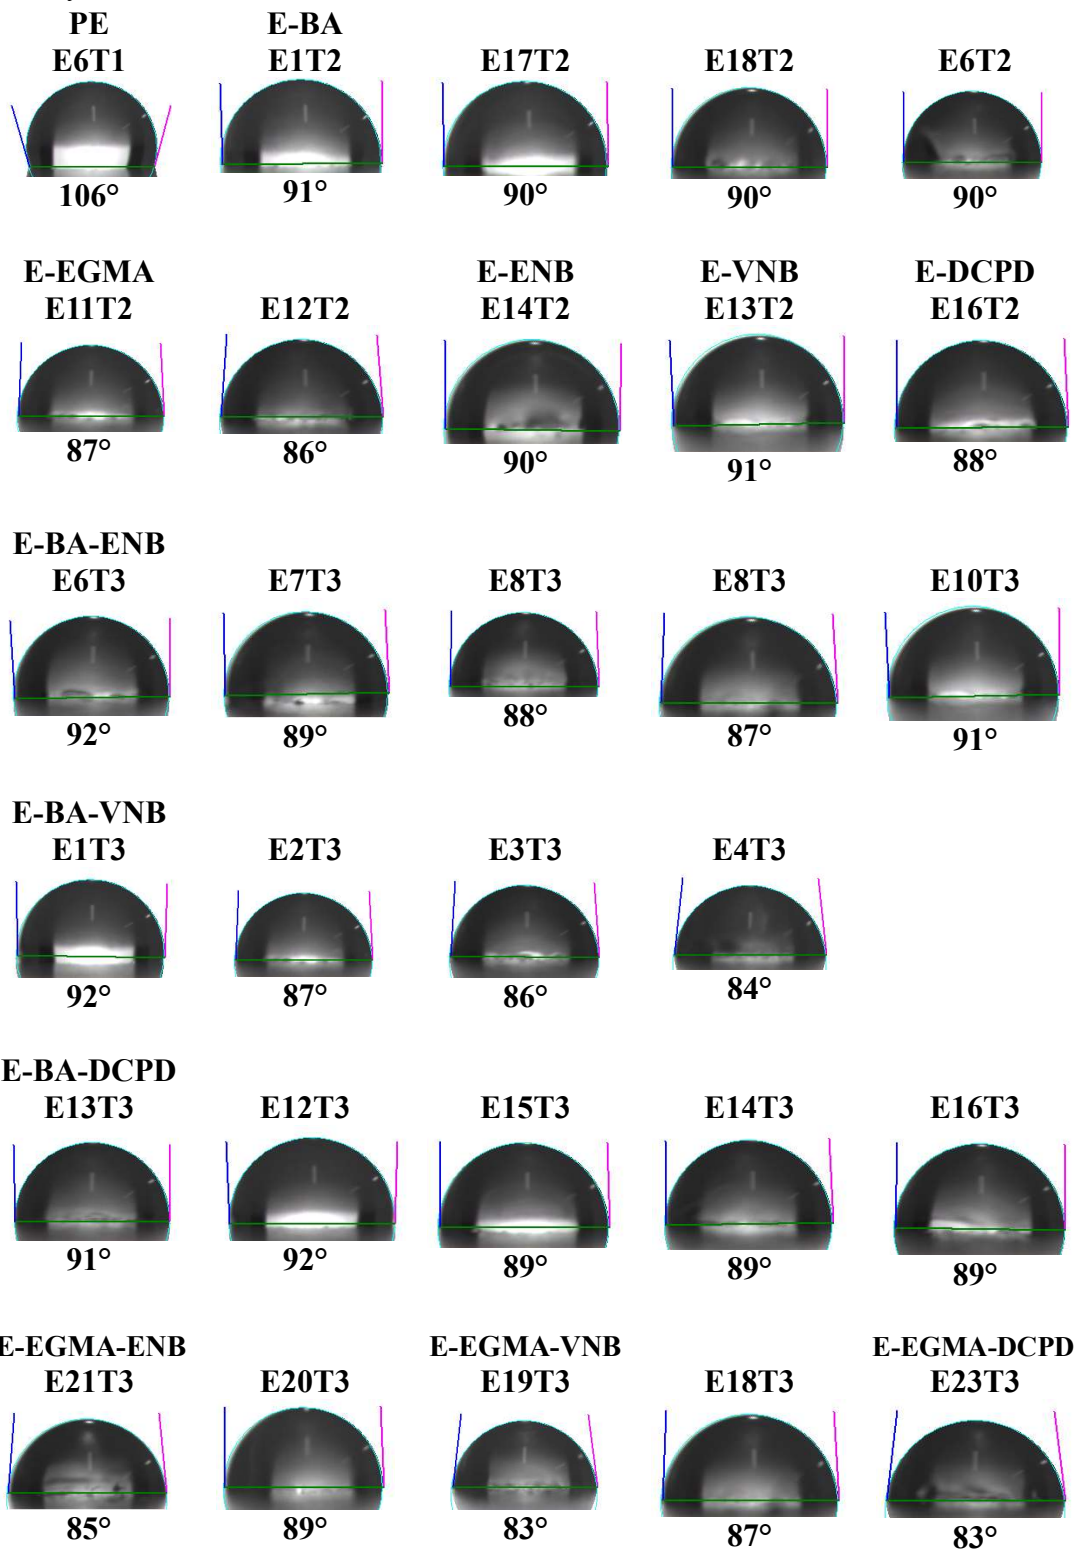

# Strain-stress curves of polymers

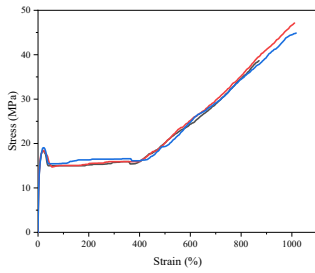

Entry 18, Table 2

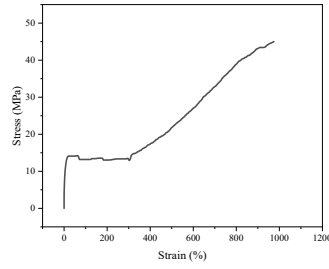

Entry 12, Table 2

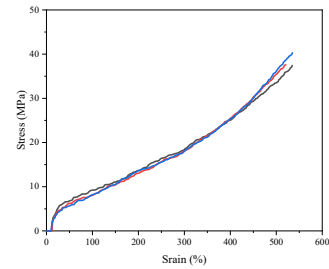

Entry 14, Table 2

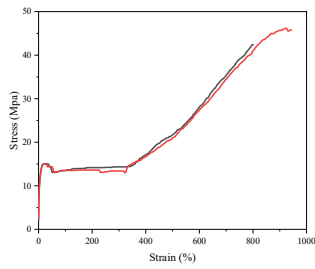

Entry 6, Table 2

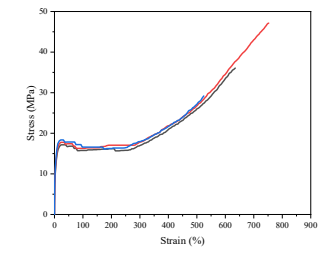

Entry 1, Table 2

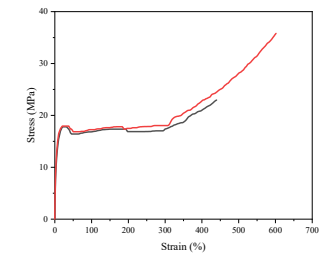

Entry 3, Table 2

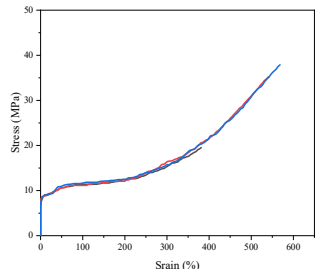

Entry 6, Table 3

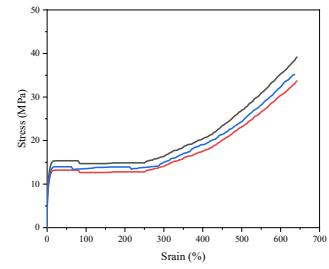

Entry 14, Table 3

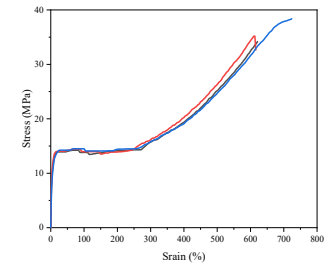

Entry 3, Table 3

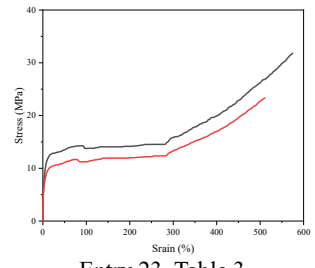

Entry 23, Table 3

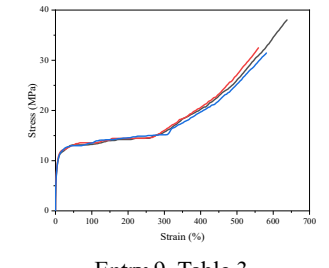

Entry 9, Table 3

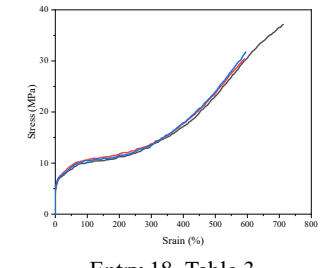

Entry 18, Table 3

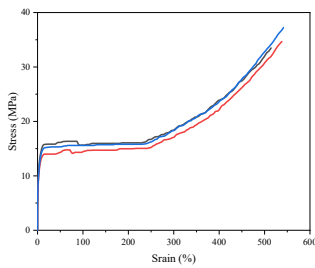

Entry 15, Table 2

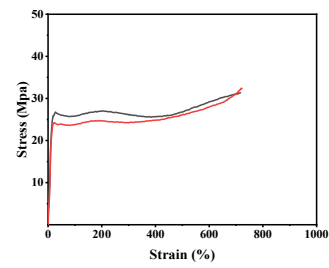

Entry 6, Table 1

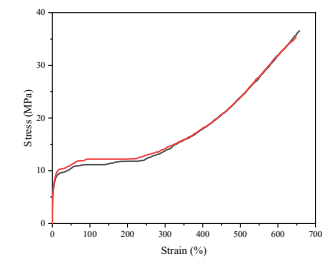

Entry 21, Table 3

# X-ray Crystallography

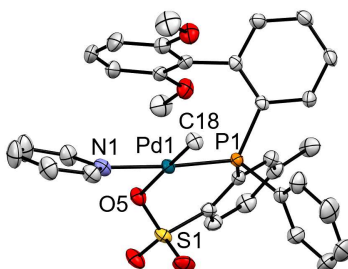

## Crystal data and structure refinement for **Pd1**

|                                   |                                                         |          |
|-----------------------------------|---------------------------------------------------------|----------|
| Empirical formula                 | C <sub>33</sub> H <sub>32</sub> N O <sub>5</sub> P Pd S |          |
| Formula weight                    | 692.02                                                  |          |
| Temperature [K]                   | 193(2) K                                                |          |
| Wavelength                        | 1.34139 Å                                               |          |
| Crystal system                    | Orthorhombic                                            |          |
| Space group                       | P2 <sub>1</sub> 2 <sub>1</sub> 2 <sub>1</sub>           |          |
| Unit cell dimensions              | a = 11.0896(6) Å                                        | α = 90°. |
|                                   | b = 12.0006(7) Å                                        | β = 90°. |
|                                   | c = 22.7952(13) Å                                       | γ = 90°. |
| Volume                            | 3033.6(3) Å <sup>3</sup>                                |          |
| Z                                 | 4                                                       |          |
| Absorption coefficient            | 4.324 mm <sup>-1</sup>                                  |          |
| F(000)                            | 1416                                                    |          |
| Crystal size                      | 0.20 x 0.16 x 0.10 mm <sup>3</sup>                      |          |
| Theta range for data collection   | 3.621 to 52.094°.                                       |          |
| Reflections collected             | 23824                                                   |          |
| Independent reflections           | 4771 [R(int) = 0.0338]                                  |          |
| Completeness to theta = 52.094°   | 96.4 %                                                  |          |
| Absorption correction             | Semi-empirical from equivalents                         |          |
| Max. and min. transmission        | 0.649 and 0.458                                         |          |
| Refinement method                 | Full-matrix least-squares on F <sup>2</sup>             |          |
| Data / restraints / parameters    | 4771 / 0 / 384                                          |          |
| Goodness-of-fit on F <sup>2</sup> | 1.093                                                   |          |
| Final R indices [I > 2σ(I)]       | R1 = 0.0215, wR2 = 0.0567                               |          |
| R indices (all data)              | R1 = 0.0215, wR2 = 0.0568                               |          |
| Absolute structure parameter      | 0.875(10)                                               |          |
| Largest diff. peak and hole       | 0.518 and -0.507 e.Å <sup>-3</sup>                      |          |

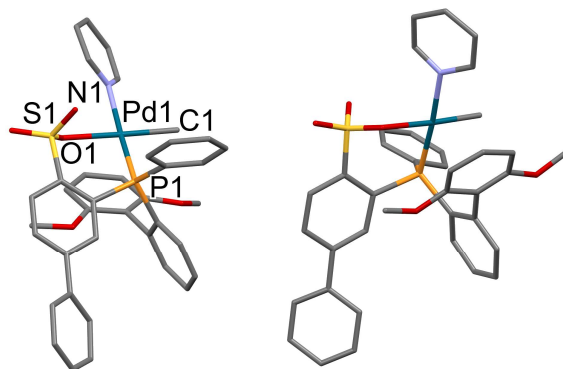

### Crystal data and structure refinement for **Pd2**

|                                             |                                                                                                              |
|---------------------------------------------|--------------------------------------------------------------------------------------------------------------|
| Empirical formula                           | C <sub>76</sub> H <sub>69</sub> N <sub>2</sub> O <sub>10</sub> P <sub>2</sub> Pd <sub>2</sub> S <sub>2</sub> |
| Formula weight                              | 1509.19                                                                                                      |
| Temperature [K]                             | 193.00                                                                                                       |
| Crystal system                              | monoclinic                                                                                                   |
| Space group (number)                        | <i>P</i> 2 <sub>1</sub> / <i>c</i> (14)                                                                      |
| <i>a</i> [Å]                                | 17.077(3)                                                                                                    |
| <i>b</i> [Å]                                | 19.687(4)                                                                                                    |
| <i>c</i> [Å]                                | 20.582(4)                                                                                                    |
| $\alpha$ [°]                                | 90.00(3)                                                                                                     |
| $\beta$ [°]                                 | 91.10(3)                                                                                                     |
| $\gamma$ [°]                                | 90.00(3)                                                                                                     |
| Volume [Å <sup>3</sup> ]                    | 6918(2)                                                                                                      |
| <i>Z</i>                                    | 4                                                                                                            |
| $\rho_{\text{calc}}$ [gcm <sup>-3</sup> ]   | 1.449                                                                                                        |
| $\mu$ [mm <sup>-1</sup> ]                   | 0.687                                                                                                        |
| <i>F</i> (000)                              | 3092                                                                                                         |
| Radiation                                   | MoK $\alpha$ ( $\lambda$ =0.71073 Å)                                                                         |
| 2 $\theta$ range [°]                        | 3.70 to 54.03 (0.78 Å)                                                                                       |
| Index ranges                                | -21 ≤ <i>h</i> ≤ 21<br>-25 ≤ <i>k</i> ≤ 25<br>-26 ≤ <i>l</i> ≤ 26                                            |
| Reflections collected                       | 129338                                                                                                       |
| Independent reflections                     | 15116<br><i>R</i> <sub>int</sub> = 0.1963<br><i>R</i> <sub>sigma</sub> = 0.1011                              |
| Completeness to<br>$\theta = 25.242^\circ$  | 100.0 %                                                                                                      |
| Data / Restraints / Parameters              | 15116/0/853                                                                                                  |
| Absorption correction                       | 0.6224/0.7455                                                                                                |
| T <sub>min</sub> /T <sub>max</sub> (method) | (none)                                                                                                       |
| Goodness-of-fit on <i>F</i> <sup>2</sup>    | 1.438                                                                                                        |
| Final <i>R</i> indexes                      | <i>R</i> <sub>1</sub> = 0.1906                                                                               |
| [ <i>I</i> ≥ 2 $\sigma$ ( <i>I</i> )]       | w <i>R</i> <sub>2</sub> = 0.3829                                                                             |
| Final <i>R</i> indexes                      | <i>R</i> <sub>1</sub> = 0.3259                                                                               |
| [all data]                                  | w <i>R</i> <sub>2</sub> = 0.4786                                                                             |
| Largest peak/hole [eÅ <sup>-3</sup> ]       | 13.88/-1.60                                                                                                  |

## References

- [1] De Graaf, W.; Boersma, J.; Smeets, W. J. J.; Spek, A. L.; Van Koten, G. *Organometallics* **1989**, 8, 2907-2917.
- [2] Biscoe, M. R.; Fors, B. P.; Buchwald, S. L. *Journal of the American Chemical Society* **2008**, 130, 6686-6687.
- [3] de Graaf, W.; Boersma, J.; Grove, D.; Spek, A. L.; van Koten, G. *Recueil des Travaux Chimiques des Pays-Bas* **1988**, 107, 299-301.
- [4] Vela, J.; Lief, G. R.; Shen, Z.; Jordan, R. F. *Organometallics* **2007**, 26, 6624-6635.
- [5] Becht, J.-M.; Ngouela, S.; Wagner, A.; Mioskowski, C. *Tetrahedron* **2004**, 60, 6853-6857.
- [6] Wada, S.; Jordan, R. F. *Angew. Chem. Int. Ed.* **2017**, 56, 1820-1824.
- [7] Neuwald, B.; Caporaso, L.; Cavallo, L.; Mecking, S. *J. Am. Chem. Soc.* **2013**, 135, 1026-1036.
- [8] Perrotin, P.; McCahill, J. S. J.; Wu, G.; Scott, S. L. *Chemical Communications* **2011**, 47, 6948-6950.
- [9] M. J. Frisch, G. W. T., H. B. Schlegel, G. E. Scuseria, M. A. Robb, J. R. Cheeseman, G. Scalmani, V. Barone, B. Mennucci, G. A. Petersson, H. Nakatsuji, M. Caricato, X. Li, H. P. Hratchian, A. F. Izmaylov, J. Bloino, G. Zheng, J. L. Sonnenberg, M. Hada, M. Ehara, K. Toyota, R. Fukuda, J. Hasegawa, M. Ishida, T. Nakajima, Y. Honda, O. Kitao, H. Nakai, T. Vreven, J. A. Montgomery, Jr., J. E. Peralta, F. Ogliaro, M. Bearpark, J. J. Heyd, E. Brothers, K. N. Kudin, V. N. Staroverov, T. Keith, R. Kobayashi, J. Normand, K. Raghavachari, A. Rendell, J. C. Burant, S. S. Iyengar, J. Tomasi, M. Cossi, N. Rega, J. M. Millam, M. Klene, J. E. Knox, J. B. Cross, V. Bakken, C. Adamo, J. Jaramillo, R. Gomperts, R. E. Stratmann, O. Yazyev, A. J. Austin, R. Cammi, C. Pomelli, J. W. Ochterski, R. L. Martin, K. Morokuma, V. G. Zakrzewski, G. A. Voth, P. Salvador, J. J. Dannenberg, S. Dapprich, A. D. Daniels, O. Farkas, J. B. Foresman, J. V. Ortiz, J. Cioslowski, and D. J. Fox: *Gaussian 09, Revision B.01*. Gaussian, Inc.: Wallingford CT, 2010.
- [10] (a) C. Lee, W. Yang, R. G. Parr, *Physical Review B* 1988, 37, 785-789. (b) B. Miehlich, A. Savin, H. Stoll, H. Preuss, *Chemical Physics Letters* 1989, 157, 200-206; cA. D. Becke, *The Journal of Chemical Physics* 1993, 98, 5648-5652.
- [11] S. Grimme, J. Antony, S. Ehrlich, H. Krieg, *The Journal of Chemical Physics* 2010, 132, 154104.
- [12] P. J. Hay, W. R. Wadt, *The Journal of Chemical Physics* 1985, 82, 270-283.
- [13] (a) R. Ditchfield, W. J. Hehre, J. A. Pople, *The Journal of Chemical Physics* 1971, 54, 724-728. (b) W. J. Hehre, R. Ditchfield, J. A. Pople, *The Journal of Chemical Physics* 1972, 56, 2257-2261.
- [14] Dunning T. H. Jr.; Hay, P. J. in *Modern Theoretical Chemistry*, Ed. H. F. Schaefer III, Vol. 3 (Plenum, New York, 1977) 128.
- [15] (a) G. W. Spitznagel, T. Clark, J. Chandrasekhar, P. V. R. Schleyer, *Journal of*



- Computational Chemistry 1982, 3, 363-371. (b) B. J. Lynch, Y. Zhao, D. G. Truhlar, The Journal of Physical Chemistry A 2003, 107, 1384-1388. (c) L. Goodman, R. R. Sauers, Journal of Computational Chemistry 2007, 28, 269-275.
- [16] Marenich, A. V.; Cramer, C. J.; Truhlar, D. G. J. Phys. Chem. B 2009, 113, 4538–4543.
- [17] Lu, T.; Chen, F. J. Comput. Chem. 2012, 33, 580–592.
- [18] Humphrey, W.; Dalke, A.; Schulten, K. J. Mol. Graphics 1996, 14,33–38.
- [19] Falivene, L.; Cao, Z.; Petta, A.; Serra, L.; Poater, A.; Oliva, R.; Scarano, V.; Cavallo, L. Nature Chemistry 2019, 11 (10), 872-879.
- [20] Wucher, P.; Goldbach, V.; Mecking, S. Organometallics **2013**, 32, 4516-4522.
- [21] Jian, Z. B.; Wucher, P.; Mecking, S. Organometallics **2014**, 33, 2879-2888.
- [22] Ye, J. H.; Mu, H. L.; Wang, Z.; Jian, Z. B. Organometallics **2019**, 38, 2990-2997.
- [23] Hu, X.; Zhang, Y.; Li, B.; Jian, Z. Chinese Journal of Chemistry **2021**, 39, 2829-2836.
- [24] Hu, X.; Zhang, Y.; Li, B.; Jian, Z. Chem. Eur. J. **2021**, 27, 11935-11942.
- [25] Zhang, Y.; Kang, X.; Jian, Z. Nat. Commun. **2022**, 13, 725.
- [26] Li, K.; Ye, J.; Wang, Z.; Mu, H.; Jian, Z. Polym. Chem. **2020**, 11, 2740-2748.
- [27] Vela, J.; Lief, G. R.; Shen, Z.; Jordan, R. F. Organometallics **2007**, 26, 6624-6635.
